# Supplementary material for: Electrochemical oxidative synthesis of 1,3,4-thiadiazoles from isothiocyanates and hydrazones
Source: Royal Society of Chemistry journal article supplement (doi:10.1039/d1qo00168j), 2021-01-01

# Supporting Information

## Electrochemical oxidative synthesis of 1,3,4-thiadiazoles from isothiocyanates and hydrazones

Zhongxiao Ma,<sup>a</sup> Xiao Hu,<sup>a</sup> Yanni Li,<sup>a</sup> Deqiang Liang,<sup>\*a</sup> Ying Dong,<sup>b</sup> Baoling Wang,<sup>a</sup>  
and Weili Li<sup>a</sup>

<sup>a</sup>School of Chemistry and Chemical Engineering, Kunming University, Kunming 650214, China

<sup>b</sup> College of Chemistry, Chemical Engineering and Materials Science, Shandong Normal  
University, Jinan 250014, China

E-mail: liangdq695@nenu.edu.cn, ldq@kmu.edu.cn

# Table of Contents

|                                                                                               |            |
|-----------------------------------------------------------------------------------------------|------------|
| <b>I. General considerations.....</b>                                                         | <b>S3</b>  |
| <b>II. Optimization of reaction conditions.....</b>                                           | <b>S4</b>  |
| <b>III. Experimental details .....</b>                                                        | <b>S6</b>  |
| 1. General procedure for the synthesis of hydrazone substrates 2.....                         | S6         |
| 2. General procedure for the electrosynthesis of 2-amino-1,3,4-thiadiazoles 3 .....           | S8         |
| 3. Procedure for the gram-scale synthesis .....                                               | S8         |
| 4. General procedure for the synthesis of thiosemicarbazides 4a,j.....                        | S9         |
| 5. Procedures for stoichiometric DDQ-mediated syntheses .....                                 | S10        |
| 6. General procedure for quenching experiments.....                                           | S10        |
| <b>IV. Spectroscopic investigations and DFT caclulations .....</b>                            | <b>S11</b> |
| 1. Cyclic voltammetry studies .....                                                           | S11        |
| 2. UV-Vis spectroscopic measurements.....                                                     | S13        |
| 3. Reaction kinetic profiles.....                                                             | S14        |
| 4. Hydrogen detection tests .....                                                             | S15        |
| 5. Electricity on-off experimnts.....                                                         | S16        |
| 6. DFT caclulations .....                                                                     | S16        |
| <b>V. Spectral data of products .....</b>                                                     | <b>S23</b> |
| <b>VI. Copies of <sup>1</sup>H, <sup>19</sup>F, <sup>13</sup>C and DEPT NMR spectra .....</b> | <b>S35</b> |

## I. General considerations

Unless otherwise stated, commercially available chemicals were used without treatment. Solvents were degassed by bubbling Ar for 30 minutes before use. Reactions were monitored by Thin Layer Chromatography (TLC) using silica gel F254 plates. Products were purified by column chromatography over 300-400 mesh silica gel under a positive pressure of air.  $^1\text{H}$  NMR,  $^{19}\text{F}$  NMR,  $^{13}\text{C}$  NMR and DEPT NMR spectra were recorded at 25 °C on a Bruker Ascend™ 400 spectrometer using TMS as internal standard. High-resolution mass spectra (HRMS) were obtained using a Bruker microTOF II Focus spectrometer (ESI). UV-Vis measurements were carried out on a UV-2450 UV-Visible spectrophotometer (Shimadzu, Japan) or a UV-3600 Plus UV-VIS-NIR spectrophotometer (Shimadzu, Japan). Cyclic voltammetry studies were carried out on a CHI600E electrochemical workstation (Shanghai CH Instruments Co., China). Electrolysis was performed using a DJS-292B dual display potentiostat (Shanghai Xinrui Instruments Co., China, Figure S1).

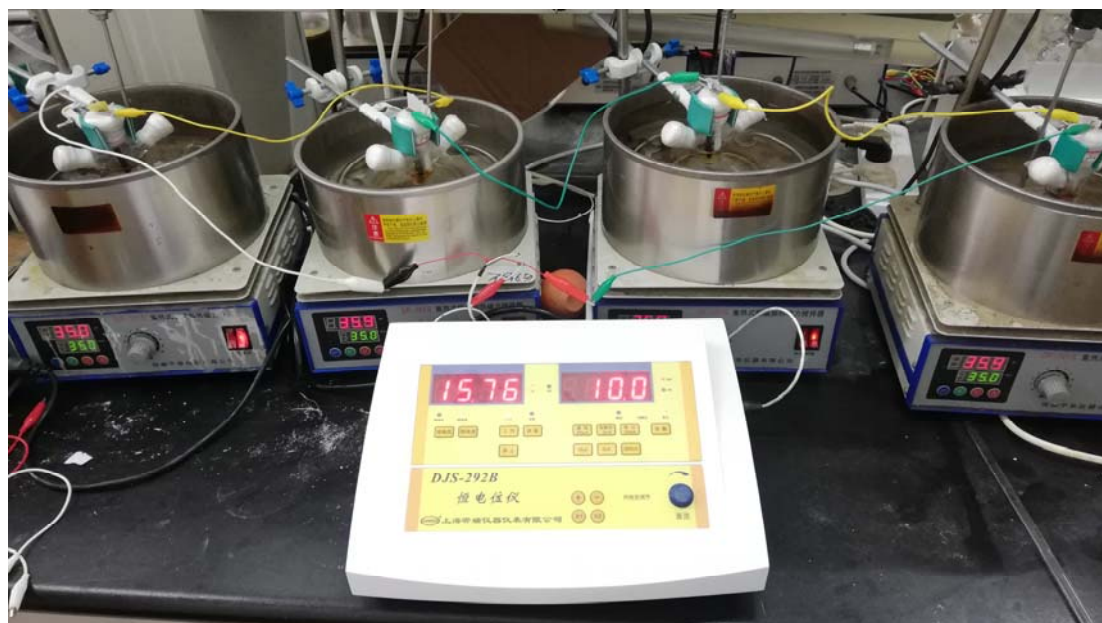

**Figure S1** Electrochemical setup

## II. Optimization of reaction conditions

Table S1 Optimization of reaction conditions<sup>a</sup>

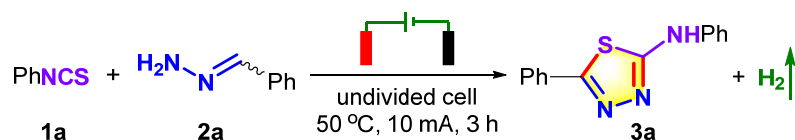

| entry | anode   | cathode | electrolyte                                  | mediator           | solvent                                                        | yield (%) |
|-------|---------|---------|----------------------------------------------|--------------------|----------------------------------------------------------------|-----------|
| 1     | C cloth | Pt      | <i>n</i> Bu <sub>4</sub> NBF <sub>4</sub>    | none               | CH <sub>3</sub> CN/H <sub>2</sub> O <sup>b</sup>               | trace     |
| 2     | C cloth | Pt      | <i>n</i> Bu <sub>4</sub> NBF <sub>4</sub>    | TEMPO              | CH <sub>3</sub> CN/H <sub>2</sub> O <sup>b</sup>               | trace     |
| 3     | C cloth | Pt      | <i>n</i> Bu <sub>4</sub> NBF <sub>4</sub>    | NHPI               | CH <sub>3</sub> CN/H <sub>2</sub> O <sup>b</sup>               | trace     |
| 4     | C cloth | Pt      | <i>n</i> Bu <sub>4</sub> NBF <sub>4</sub>    | Cp <sub>2</sub> Fe | CH <sub>3</sub> CN/H <sub>2</sub> O <sup>b</sup>               | 31        |
| 5     | C cloth | Pt      | <i>n</i> Bu <sub>4</sub> NBF <sub>4</sub>    | TBAI               | CH <sub>3</sub> CN/H <sub>2</sub> O <sup>b</sup>               | 0         |
| 6     | C cloth | Pt      | <i>n</i> Bu <sub>4</sub> NBF <sub>4</sub>    | TBAB               | CH <sub>3</sub> CN/H <sub>2</sub> O <sup>b</sup>               | 21        |
| 7     | C cloth | Pt      | <b><i>n</i>Bu<sub>4</sub>NBF<sub>4</sub></b> | <b>DDQ</b>         | <b>CH<sub>3</sub>CN/H<sub>2</sub>O<sup>b</sup></b>             | 56        |
| 8     | C cloth | Pt      | <i>n</i> Bu <sub>4</sub> NBF <sub>4</sub>    | DDQ                | CH <sub>3</sub> CN/HFIP <sup>b</sup>                           | 43        |
| 9     | C cloth | Pt      | <i>n</i> Bu <sub>4</sub> NBF <sub>4</sub>    | DDQ                | CH <sub>3</sub> CN/TFE <sup>b</sup>                            | 31        |
| 10    | C cloth | Pt      | <i>n</i> Bu <sub>4</sub> NBF <sub>4</sub>    | DDQ                | CH <sub>3</sub> CN/MeOH <sup>b</sup>                           | 41        |
| 11    | C cloth | Pt      | <i>n</i> Bu <sub>4</sub> NBF <sub>4</sub>    | DDQ                | CH <sub>3</sub> CN/HOAc <sup>b</sup>                           | 31        |
| 12    | C cloth | Pt      | <i>n</i> Bu <sub>4</sub> NBF <sub>4</sub>    | DDQ                | CH <sub>3</sub> CN/TFA <sup>b</sup>                            | 23        |
| 13    | C cloth | Pt      | <i>n</i> Bu <sub>4</sub> NBF <sub>4</sub>    | DDQ                | CH <sub>3</sub> CN                                             | 30        |
| 14    | C cloth | Pt      | <i>n</i> Bu <sub>4</sub> NBF <sub>4</sub>    | DDQ                | HFIP                                                           | 16        |
| 15    | C cloth | Pt      | <i>n</i> Bu <sub>4</sub> NBF <sub>4</sub>    | DDQ                | TFE                                                            | 31        |
| 16    | C cloth | Pt      | <i>n</i> Bu <sub>4</sub> NBF <sub>4</sub>    | DDQ                | MeOH                                                           | 14        |
| 17    | C cloth | Pt      | <i>n</i> Bu <sub>4</sub> NBF <sub>4</sub>    | DDQ                | DCE/H <sub>2</sub> O <sup>b</sup>                              | trace     |
| 18    | C cloth | Pt      | <i>n</i> Bu <sub>4</sub> NBF <sub>4</sub>    | DDQ                | PhCF <sub>3</sub> /H <sub>2</sub> O <sup>b</sup>               | 0         |
| 19    | C cloth | Pt      | <i>n</i> Bu <sub>4</sub> NBF <sub>4</sub>    | DDQ                | acetone/H <sub>2</sub> O <sup>b</sup>                          | trace     |
| 20    | C cloth | Pt      | <i>n</i> Bu <sub>4</sub> NBF <sub>4</sub>    | DDQ                | CH <sub>3</sub> NO <sub>2</sub> /H <sub>2</sub> O <sup>b</sup> | 0         |
| 21    | C cloth | Pt      | <i>n</i> Bu <sub>4</sub> NBF <sub>4</sub>    | DDQ                | THF/H <sub>2</sub> O <sup>b</sup>                              | 19        |
| 22    | C cloth | Pt      | <i>n</i> Bu <sub>4</sub> NBF <sub>4</sub>    | DDQ                | DMF/H <sub>2</sub> O <sup>b</sup>                              | 52        |
| 23    | C cloth | Pt      | <i>n</i> Bu <sub>4</sub> NBF <sub>4</sub>    | DDQ                | DMA/H <sub>2</sub> O <sup>b</sup>                              | 35        |
| 24    | C cloth | Pt      | <i>n</i> Bu <sub>4</sub> NBF <sub>4</sub>    | DDQ                | DMSO/H <sub>2</sub> O <sup>b</sup>                             | 27        |
| 25    | C cloth | Pt      | <i>n</i> Bu <sub>4</sub> NBF <sub>4</sub>    | DDQ                | HFIP/H <sub>2</sub> O <sup>b</sup>                             | 12        |
| 26    | C cloth | Pt      | <i>n</i> Bu <sub>4</sub> NBF <sub>4</sub>    | DDQ                | TFE/H <sub>2</sub> O <sup>b</sup>                              | 30        |
| 27    | C cloth | Pt      | <i>n</i> Bu <sub>4</sub> NBF <sub>4</sub>    | DDQ                | MeOH/H <sub>2</sub> O <sup>b</sup>                             | 38        |
| 28    | C cloth | Pt      | <i>n</i> Bu <sub>4</sub> NBF <sub>4</sub>    | DDQ                | CH <sub>3</sub> CN/H <sub>2</sub> O <sup>c</sup>               | 34        |
| 29    | C cloth | Pt      | <i>n</i> Bu <sub>4</sub> NBF <sub>4</sub>    | DDQ                | CH <sub>3</sub> CN/H <sub>2</sub> O <sup>d</sup>               | 50        |
| 30    | C cloth | Pt      | <i>n</i> Bu <sub>4</sub> NBF <sub>4</sub>    | DDQ                | CH <sub>3</sub> CN/H <sub>2</sub> O <sup>e</sup>               | 47        |
| 31    | C cloth | Pt      | <i>n</i> Bu <sub>4</sub> NBF <sub>4</sub>    | DDQ                | CH <sub>3</sub> CN/H <sub>2</sub> O <sup>f</sup>               | 38        |
| 32    | C cloth | Pt      | <i>n</i> Bu <sub>4</sub> NBF <sub>4</sub>    | DDQ                | CH <sub>3</sub> CN/H <sub>2</sub> O <sup>g</sup>               | 38        |
| 33    | C cloth | Pt      | <i>n</i> Bu <sub>4</sub> NBF <sub>4</sub>    | DDQ                | CH <sub>3</sub> CN/H <sub>2</sub> O <sup>h</sup>               | 30        |

|                  |               |                 |                                                        |                  |                                                    |           |
|------------------|---------------|-----------------|--------------------------------------------------------|------------------|----------------------------------------------------|-----------|
| 34               | C cloth       | Pt              | <i>n</i> Bu <sub>4</sub> NBF <sub>4</sub>              | DDQ              | CH <sub>3</sub> CN/H <sub>2</sub> O <sup>i</sup>   | trace     |
| 35               | C cloth       | Pt              | <i>n</i> Bu <sub>4</sub> NBF <sub>4</sub>              | DDQ              | MeOH/H <sub>2</sub> O <sup>d</sup>                 | 34        |
| 36               | C cloth       | Pt              | <i>n</i> Bu <sub>4</sub> NBF <sub>4</sub>              | DDQ              | MeOH/H <sub>2</sub> O <sup>e</sup>                 | 34        |
| 37               | C cloth       | Pt              | LiClO <sub>4</sub>                                     | DDQ              | CH <sub>3</sub> CN/H <sub>2</sub> O <sup>b</sup>   | 51        |
| 38               | C cloth       | Pt              | Et <sub>4</sub> NBF <sub>4</sub>                       | DDQ              | CH <sub>3</sub> CN/H <sub>2</sub> O <sup>b</sup>   | 50        |
| 39               | C cloth       | Pt              | <i>n</i> Bu <sub>4</sub> NPF <sub>6</sub>              | DDQ              | CH <sub>3</sub> CN/H <sub>2</sub> O <sup>b</sup>   | 52        |
| 40               | C cloth       | Pt              | <i>n</i> Bu <sub>4</sub> NOAc                          | DDQ              | CH <sub>3</sub> CN/H <sub>2</sub> O <sup>b</sup>   | 0         |
| 41               | C cloth       | Pt              | <i>n</i> Bu <sub>4</sub> NClO <sub>4</sub>             | DDQ              | CH <sub>3</sub> CN/H <sub>2</sub> O <sup>b</sup>   | 44        |
| 42 <sup>j</sup>  | C cloth       | Pt              | <i>n</i> Bu <sub>4</sub> NBF <sub>4</sub>              | DDQ              | CH <sub>3</sub> CN/H <sub>2</sub> O <sup>b</sup>   | 20        |
| 43 <sup>k</sup>  | C cloth       | Pt              | <i>n</i> Bu <sub>4</sub> NBF <sub>4</sub>              | DDQ              | CH <sub>3</sub> CN/H <sub>2</sub> O <sup>b</sup>   | 0         |
| 44 <sup>l</sup>  | C cloth       | Pt              | <i>n</i> Bu <sub>4</sub> NBF <sub>4</sub>              | DDQ              | CH <sub>3</sub> CN/H <sub>2</sub> O <sup>b</sup>   | 0         |
| 45               | Pt            | Pt              | <i>n</i> Bu <sub>4</sub> NBF <sub>4</sub>              | DDQ              | CH <sub>3</sub> CN/H <sub>2</sub> O <sup>b</sup>   | 29        |
| 46               | graphite felt | Pt              | <i>n</i> Bu <sub>4</sub> NBF <sub>4</sub>              | DDQ              | CH <sub>3</sub> CN/H <sub>2</sub> O <sup>b</sup>   | 47        |
| 47               | graphite rod  | <b>Pt</b>       | <i>n</i> Bu <sub>4</sub> NBF <sub>4</sub>              | DDQ              | CH <sub>3</sub> CN/H <sub>2</sub> O <sup>b</sup>   | 59        |
| 48               | graphite rod  | stainless steel | <i>n</i> Bu <sub>4</sub> NBF <sub>4</sub>              | DDQ              | CH <sub>3</sub> CN/H <sub>2</sub> O <sup>b</sup>   | 46        |
| 49               | graphite rod  | Ni              | <i>n</i> Bu <sub>4</sub> NBF <sub>4</sub>              | DDQ              | CH <sub>3</sub> CN/H <sub>2</sub> O <sup>b</sup>   | 44        |
| 50               | graphite rod  | Ni foam         | <i>n</i> Bu <sub>4</sub> NBF <sub>4</sub>              | DDQ              | CH <sub>3</sub> CN/H <sub>2</sub> O <sup>b</sup>   | 50        |
| 51               | graphite rod  | Cu foam         | <i>n</i> Bu <sub>4</sub> NBF <sub>4</sub>              | DDQ              | CH <sub>3</sub> CN/H <sub>2</sub> O <sup>b</sup>   | 37        |
| 52               | graphite rod  | C cloth         | <i>n</i> Bu <sub>4</sub> NBF <sub>4</sub>              | DDQ              | CH <sub>3</sub> CN/H <sub>2</sub> O <sup>b</sup>   | 22        |
| 53               | graphite rod  | graphite felt   | <i>n</i> Bu <sub>4</sub> NBF <sub>4</sub>              | DDQ              | CH <sub>3</sub> CN/H <sub>2</sub> O <sup>b</sup>   | 44        |
| 54               | graphite rod  | graphite rod    | <i>n</i> Bu <sub>4</sub> NBF <sub>4</sub>              | DDQ              | CH <sub>3</sub> CN/H <sub>2</sub> O <sup>b</sup>   | 56        |
| 55               | graphite rod  | Pt              | <i>n</i> Bu <sub>4</sub> NBF <sub>4</sub>              | DDQ              | CH <sub>3</sub> CN/H <sub>2</sub> O <sup>b</sup>   | 50        |
| 56               | graphite rod  | Pt              | <i>n</i> Bu <sub>4</sub> NBF <sub>4</sub>              | DDQ              | CH <sub>3</sub> CN/H <sub>2</sub> O <sup>b</sup>   | 45        |
| 57               | graphite rod  | Pt              | <i>n</i> Bu <sub>4</sub> NBF <sub>4</sub>              | DDQ              | CH <sub>3</sub> CN/H <sub>2</sub> O <sup>b</sup>   | 54        |
| 58               | graphite rod  | Pt              | <i>n</i> Bu <sub>4</sub> NBF <sub>4</sub>              | DDQ              | CH <sub>3</sub> CN/H <sub>2</sub> O <sup>b</sup>   | 13        |
| 59               | graphite rod  | Pt              | <i>n</i> Bu <sub>4</sub> NBF <sub>4</sub>              | DDQ              | CH <sub>3</sub> CN/H <sub>2</sub> O <sup>b,m</sup> | 58        |
| 60 <sup>n</sup>  | graphite rod  | Pt              | <i>n</i> Bu <sub>4</sub> NBF <sub>4</sub>              | DDQ              | CH <sub>3</sub> CN/H <sub>2</sub> O <sup>b</sup>   | 48        |
| 61 <sup>o</sup>  | graphite rod  | Pt              | <i>n</i> Bu <sub>4</sub> NBF <sub>4</sub>              | DDQ              | CH <sub>3</sub> CN/H <sub>2</sub> O <sup>b</sup>   | 40        |
| 62 <sup>p</sup>  | graphite rod  | Pt              | <i>n</i> Bu <sub>4</sub> NBF <sub>4</sub>              | DDQ              | CH <sub>3</sub> CN/H <sub>2</sub> O <sup>b</sup>   | 51        |
| 63               | graphite rod  | Pt              | <i>n</i> Bu <sub>4</sub> NBF <sub>4</sub>              | DDQ <sup>q</sup> | CH <sub>3</sub> CN/H <sub>2</sub> O <sup>b</sup>   | 49        |
| 64               | graphite rod  | Pt              | <i>n</i> Bu <sub>4</sub> NBF <sub>4</sub>              | DDQ <sup>r</sup> | CH <sub>3</sub> CN/H <sub>2</sub> O <sup>b</sup>   | 36        |
| 65               | graphite rod  | Pt              | <i>n</i> Bu <sub>4</sub> NBF <sub>4</sub>              | DDQ <sup>s</sup> | CH <sub>3</sub> CN/H <sub>2</sub> O <sup>b</sup>   | 35        |
| 66               | graphite rod  | Pt              | none                                                   | DDQ              | CH <sub>3</sub> CN/H <sub>2</sub> O <sup>b</sup>   | 36        |
| 67               | graphite rod  | Pt              | <i>n</i> Bu <sub>4</sub> NBF <sub>4</sub> <sup>t</sup> | DDQ              | CH <sub>3</sub> CN/H <sub>2</sub> O <sup>b</sup>   | 38        |
| 68               | graphite rod  | Pt              | <i>n</i> Bu <sub>4</sub> NBF <sub>4</sub> <sup>u</sup> | DDQ              | CH <sub>3</sub> CN/H <sub>2</sub> O <sup>b</sup>   | 58        |
| 69 <sup>v</sup>  | graphite rod  | Pt              | <i>n</i> Bu <sub>4</sub> NBF <sub>4</sub>              | DDQ              | CH <sub>3</sub> CN/H <sub>2</sub> O <sup>b</sup>   | 43        |
| 70 <sup>w</sup>  | graphite rod  | Pt              | <i>n</i> Bu <sub>4</sub> NBF <sub>4</sub>              | DDQ              | CH <sub>3</sub> CN/H <sub>2</sub> O <sup>b</sup>   | 61        |
| 71 <sup>x</sup>  | graphite rod  | Pt              | <i>n</i> Bu <sub>4</sub> NBF <sub>4</sub>              | DDQ              | CH <sub>3</sub> CN/H <sub>2</sub> O <sup>b</sup>   | 60        |
| 72 <sup>y</sup>  | graphite rod  | <b>Pt</b>       | <b><i>n</i>Bu<sub>4</sub>NBF<sub>4</sub></b>           | <b>DDQ</b>       | <b>CH<sub>3</sub>CN/H<sub>2</sub>O<sup>b</sup></b> | <b>62</b> |
| 73 <sup>z</sup>  | graphite rod  | Pt              | <i>n</i> Bu <sub>4</sub> NBF <sub>4</sub>              | DDQ              | CH <sub>3</sub> CN/H <sub>2</sub> O <sup>b</sup>   | 56        |
| 74 <sup>aa</sup> | graphite rod  | Pt              | <i>n</i> Bu <sub>4</sub> NBF <sub>4</sub>              | DDQ              | CH <sub>3</sub> CN/H <sub>2</sub> O <sup>b</sup>   | 54        |
| 75 <sup>ab</sup> | -             | -               | <i>n</i> Bu <sub>4</sub> NBF <sub>4</sub>              | DDQ              | CH <sub>3</sub> CN/H <sub>2</sub> O <sup>b</sup>   | 0         |

<sup>a</sup> Reaction conditions: Undivided cell, electrodes (15 mm × 15 mm), constant current electrolysis at 10 mA, **1a** (0.5 mmol), **2a** (0.75 mmol), mediator (0.1 mmol),

supporting electrolyte (0.5 mmol), solvents (12.0 mL), Ar, 50 °C, 3 h. <sup>b</sup> 9:1, v/v. <sup>c</sup> 15:1, v/v. <sup>d</sup> 12:1, v/v. <sup>e</sup> 7:1, v/v. <sup>f</sup> 4:1, v/v. <sup>g</sup> 2:1, v/v. <sup>h</sup> 1:1, v/v. <sup>i</sup> 1:2, v/v. <sup>j</sup> Trifluoroacetic acid (1.0 equiv) was added as an additive. <sup>k</sup> KOAc (1.0 equiv) was added as an additive. <sup>l</sup> K<sub>2</sub>CO<sub>3</sub> (1.0 equiv) was added as an additive. <sup>m</sup> 6.0 mL. <sup>n</sup> 2.0 equiv of **2a** were used. <sup>o</sup> 1.2 equiv of **2a** were used. <sup>p</sup> The reaction was run with 0.5 mmol of **2a** and 0.75 mmol of **1a**. <sup>q</sup> 10 mol%. <sup>r</sup> 30 mol%. <sup>s</sup> 40 mol%. <sup>t</sup> 0.5 equiv. <sup>u</sup> 1.5 equiv. <sup>v</sup> The reaction was run at room temperature. <sup>w</sup> **The reaction was run at 35 °C.** <sup>x</sup> The reaction was run at 65 °C. <sup>y</sup> **The reaction time was 2.7 h.** <sup>z</sup> The reaction time was 3.5 h. <sup>aa</sup> The reaction was run under air atmosphere. <sup>ab</sup> No electricity.

### III. Experimental details

#### 1. General procedure for the synthesis of hydrazone substrates **2**<sup>1</sup>

A conical flask, equipped with a dropping funnel and a magnetic stirring bar, was charged with hydrazine hydrate (12.0 mmol, 1.2 equiv), then a solution of aldehyde (10.0 mmol) in methanol (25.0 mL) was added dropwise for 30 min. The mixture was stirred at room temperature for 1 h. After the aldehyde was consumed as indicated by TLC, methanol and the extra hydrazine were removed under reduced pressure at 25 °C. Water (30.0 mL) was added and the mixture was extracted with dichloromethane (3 × 20 mL). The combined extracts were washed with brine and dried with anhydrous sodium sulfate. Solvent was removed by rotary evaporation at 25 °C to provide the desired hydrazones **2**, which were used directly without further purification.

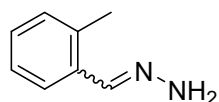

**2p**, (2-methylbenzylidene)hydrazine, yellow oil. <sup>1</sup>H NMR (400 MHz, DMSO-*d*<sub>6</sub>) δ 8.93 (s, 1H), 7.98 (d, *J* = 7.4 Hz, 1H), 7.41 (ddd, *J* = 7.3, 7.3, 1.5 Hz, 1H), 7.31 (ddd, *J* = 7.6, 3.7, 3.7 Hz, 2H), 2.54 (s, 3H). <sup>13</sup>C {<sup>1</sup>H} NMR (100 MHz, DMSO-*d*<sub>6</sub>) δ 160.4, 139.0, 132.2, 131.6, 131.5, 127.7, 126.7, 19.8. HRMS (ESI-TOF) Calcd for C<sub>8</sub>H<sub>11</sub>N<sub>2</sub><sup>+</sup> ([M+H]<sup>+</sup>) 135.0917. Found 135.0925.

<sup>1</sup> D. Cao, P. Pan, H. Zeng and C.-J. Li, *Chem. Commun.*, 2019, **55**, 9323–9326.

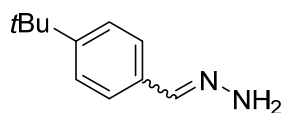

**2q**, (4-(*tert*-butyl)benzylidene)hydrazine, yellow solid: mp 199–200 °C.  $^1\text{H}$  NMR (400 MHz, Pyridine-*d*<sub>5</sub>)  $\delta$  8.92 (s, 1H), 8.00 (d,  $J$  = 7.9 Hz, 2H), 7.49 (d,  $J$  = 8.0 Hz, 2H), 1.24 (s, 9H).  $^{13}\text{C}\{^1\text{H}\}$  NMR (100 MHz, Pyridine-*d*<sub>5</sub>)  $\delta$  161.6, 154.6, 132.1, 128.6, 126.0, 34.8, 30.9. HRMS (ESI-TOF) Calcd for  $\text{C}_{11}\text{H}_{17}\text{N}_2^+$  ( $[\text{M}+\text{H}]^+$ ) 177.1386. Found 177.1389.

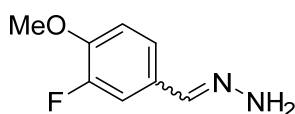

**2r**, (3-fluoro-4-methoxybenzylidene)hydrazine, yellow solid: mp 204–205 °C.  $^1\text{H}$  NMR (400 MHz, Pyridine-*d*<sub>5</sub>)  $\delta$  8.80 (d,  $J$  = 1.4 Hz, 1H), 7.94 (dd,  $J$  = 12.1, 2.0 Hz, 1H), 7.63 (ddd,  $J$  = 8.5, 1.5, 1.5 Hz, 1H), 7.06 (dd,  $J$  = 8.5, 8.5 Hz, 1H), 3.75 (s, 3H).  $^{13}\text{C}\{^1\text{H}\}$  NMR (100 MHz, Pyridine-*d*<sub>5</sub>)  $\delta$  160.5 (d,  $J$  = 2.7 Hz), 152.5 (d,  $J$  = 246.2 Hz), 150.4 (d,  $J$  = 10.9 Hz), 127.8 (d,  $J$  = 6.6 Hz), 126.5 (d,  $J$  = 3.1 Hz), 114.7 (d,  $J$  = 19.0 Hz), 113.5 (d,  $J$  = 2.0 Hz), 55.9.  $^{19}\text{F}$  NMR (376 MHz, Pyridine-*d*<sub>5</sub>)  $\delta$  -134.27 – -134.32 (m, 1F). HRMS (ESI-TOF) Calcd for  $\text{C}_8\text{H}_{10}\text{FN}_2\text{O}^+$  ( $[\text{M}+\text{H}]^+$ ) 169.0772. Found 169.0770.

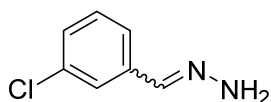

**2v**, (3-chlorobenzylidene)hydrazine, yellow oil.  $^1\text{H}$  NMR (400 MHz, DMSO-*d*<sub>6</sub>)  $\delta$  8.73 (s, 1H), 7.94 (dd,  $J$  = 1.8, 1.8 Hz, 1H), 7.86 (ddd,  $J$  = 7.6, 1.4, 1.4 Hz, 1H), 7.61 (ddd,  $J$  = 8.0, 2.2, 1.3 Hz, 1H), 7.56 (dd,  $J$  = 7.8, 7.8 Hz, 1H).  $^{13}\text{C}\{^1\text{H}\}$  NMR (100 MHz, DMSO-*d*<sub>6</sub>)  $\delta$  161.2, 136.2, 134.2, 131.7, 131.4, 128.3, 127.4. HRMS (ESI-TOF) Calcd for  $\text{C}_7\text{H}_8\text{ClN}_2^+$  ( $[\text{M}+\text{H}]^+$ ) 155.0371. Found 155.0359.

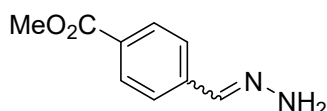

**2ab**, methyl 4-(hydrazonomethyl)benzoate, yellow solid: mp 191–192 °C.  $^1\text{H}$  NMR (400 MHz, DMSO-*d*<sub>6</sub>)  $\delta$  7.90 (d,  $J$  = 8.4 Hz, 2H), 7.59 (d,  $J$  = 8.4 Hz, 2H), 7.23 (s, 2H), 3.84 (s, 3H).  $^{13}\text{C}\{^1\text{H}\}$  NMR (100 MHz, DMSO-*d*<sub>6</sub>)  $\delta$  166.5, 141.7, 136.4, 130.0, 128.1, 125.4, 52.5. HRMS (ESI-TOF) Calcd for  $\text{C}_9\text{H}_{11}\text{N}_2\text{O}_2^+$  ( $[\text{M}+\text{H}]^+$ ) 179.0815.

Found 179.0814.

## 2. General procedure for the electrosynthesis of 2-amino-1,3,4-thiadiazoles **3**

A custom-made undivided cell, equipped with a magnetic stirring bar, a graphite rod anode ( $\varnothing$  6 mm) and a platinum plate cathode (15 mm  $\times$  15 mm  $\times$  0.3 mm, carefully polished until shining), was charged under argon sequentially with hydrazone **2** (1.5 equiv, 0.75 mmol), electrolyte *n*Bu<sub>4</sub>NBF<sub>4</sub> (1.0 equiv, 0.5 mmol), aryl isothiocyanate **1** (0.5 mmol), degassed CH<sub>3</sub>CN (8.8 mL), and water (1.2 mL), followed by the addition of a solution of DDQ (20 mol%, 0.1 mmol) in CH<sub>3</sub>CN (2.0 mL). The mixture was electrolyzed with stirring using a constant current of 10.0 mA at 35 °C (oil bath) for 2.7 h (2 F/mol); then it was quenched with water (60.0 mL) and extracted with CH<sub>2</sub>Cl<sub>2</sub> (50.0 mL) four times. The residue obtained after evaporation of the solvent was purified by column chromatography on silica gel (petroleum ether–ethyl acetate–dichloromethane–triethylamine = 60:5:12:1) to afford 2-amino-1,3,4-thiadiazoles **3**.

## 3. Procedure for the gram-scale synthesis

A 100-mL two-necked flask, equipped with a magnetic stirring bar, a graphite rod anode ( $\varnothing$  6 mm) and a platinum plate cathode (15 mm  $\times$  15 mm  $\times$  0.3 mm, carefully polished until shining), was charged under argon sequentially with benzaldehyde hydrazone **2a** (1.5 equiv, 12.0 mmol, 1.44 g), electrolyte *n*Bu<sub>4</sub>NBF<sub>4</sub> (1.0 equiv, 8.0 mmol, 2.63 g), phenyl isothiocyanate **1a** (8.0 mmol, 0.96 mL), degassed CH<sub>3</sub>CN (62.0 mL), and water (8.0 mL), followed by the addition of a solution of DDQ (20 mol%, 1.6 mmol, 0.36 g) in CH<sub>3</sub>CN (10.0 mL). The mixture was electrolyzed with stirring using a constant current of 10.0 mA at 35 °C (oil bath) for 44 h (2 F/mol, Figure S2); then it was quenched with water (200.0 mL) and extracted with CH<sub>2</sub>Cl<sub>2</sub> (150.0 mL) four times. The residue obtained after evaporation of the solvent was purified by column chromatography on silica gel (petroleum ether–ethyl acetate–dichloromethane–triethylamine = 60:5:12:1) to afford the 2-amino-1,3,4-thiadiazole **3a**.



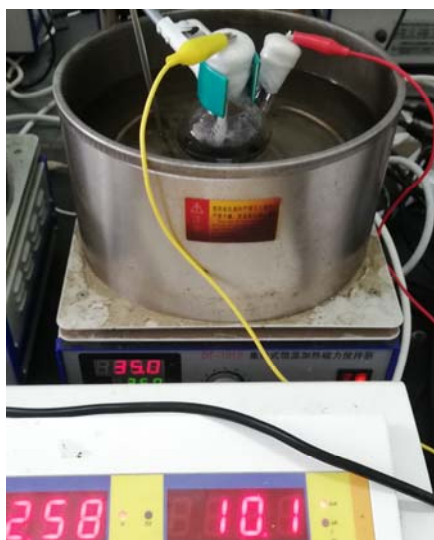

**Figure S2** Setup for the gram-scale synthesis

#### 4. General procedure for the synthesis of thiosemicarbazides **4a,j**

A custom-made undivided cell, equipped with a magnetic stirring bar, was charged sequentially with hydrazone **2** (1.5 equiv, 0.75 mmol), degassed CH<sub>3</sub>CN (10.8 mL), and water (1.2 mL), followed by the addition of aryl isothiocyanate **1** (0.5 mmol). The mixture was stirred at 35 °C (oil bath) for 2.0 h; then it was quenched with water (60.0 mL) and extracted with CH<sub>2</sub>Cl<sub>2</sub> (50.0 mL) four times. The residue obtained after evaporation of the solvent was purified by column chromatography on silica gel (petroleum ether–ethyl acetate–dichloromethane–triethylamine = 60:5:12:1) to afford the thiosemicarbazides **4a** and **4j**.

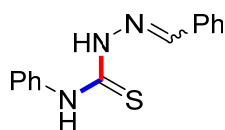

**4a**, 2-benzylidene-*N*-phenylhydrazine-1-carbothioamide, <sup>2</sup> white solid: mp 190–191 °C. <sup>1</sup>H NMR (400 MHz, DMSO-*d*<sub>6</sub>) δ 11.75 (brs, 1H), 10.11 (s, 1H), 8.14 (s, 1H), 7.89 – 7.86 (m, 2H), 7.52 (d, *J* = 7.1 Hz, 2H), 7.42 (p, *J* = 3.5 Hz, 3H), 7.37 (t, *J* = 7.8 Hz, 2H), 7.21 (t, *J* = 7.4 Hz, 1H). <sup>13</sup>C{<sup>1</sup>H} NMR (100 MHz, DMSO-*d*<sub>6</sub>) δ 176.4, 143.7, 139.3, 134.2, 130.7, 129.2, 128.6, 128.0, 126.4, 126.0. HRMS (ESI-TOF) Calcd for C<sub>14</sub>H<sub>14</sub>N<sub>3</sub>S<sup>+</sup> ([M+H]<sup>+</sup>) 256.0903. Found 256.0905.

<sup>2</sup> M. Bonizzoni, L. Fabbri, A. Taglietti and F. Tiengo, *Eur. J. Org. Chem.*, 2006, 3567–3574.

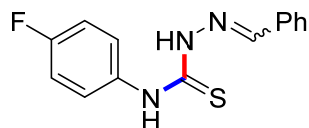

**4j**, 2-benzylidene-*N*-(4-fluorophenyl)hydrazine-1-carbothioamide, white solid: mp 190–191 °C. <sup>1</sup>H NMR (400 MHz, DMSO-*d*<sub>6</sub>) δ 11.89 (s, 1H), 10.14 (s, 1H), 8.20 (s, 1H), 7.92 (dd, *J* = 6.6, 2.9 Hz, 2H), 7.58 (dd, *J* = 8.8, 5.1 Hz, 2H), 7.45 – 7.42 (m, 3H), 7.21 (dd, *J* = 8.8, 8.8 Hz, 2H). <sup>13</sup>C{<sup>1</sup>H} NMR (100 MHz, DMSO-*d*<sub>6</sub>) δ 176.9, 160.15 (d, *J* = 242.1 Hz), 143.5, 135.89 (d, *J* = 2.9 Hz), 134.5, 130.5, 129.1, 128.64 (d, *J* = 8.3 Hz), 128.1, 115.17 (d, *J* = 22.4 Hz). <sup>19</sup>F NMR (376 MHz, DMSO-*d*<sub>6</sub>) δ -116.98 – -117.05 (m, 1F). HRMS (ESI-TOF) Calcd for C<sub>14</sub>H<sub>13</sub>FN<sub>3</sub>S<sup>+</sup> ([M+H]<sup>+</sup>) 274.0809. Found 274.0816.

## 5. Procedures for stoichiometric DDQ-mediated syntheses

From **1a** and **2a**: A custom-made undivided cell, equipped with a magnetic stirring bar, was charged under argon sequentially with hydrazone **2a** (1.5 equiv, 0.75 mmol, 90 mg), isothiocyanate **1a** (0.5 mmol, 68 mg), degassed CH<sub>3</sub>CN (8.8 mL), and water (1.2 mL), followed by the addition of a solution of DDQ (1.2 equiv, 136 mg) in CH<sub>3</sub>CN (2.0 mL). The mixture was stirred at 35 °C (oil bath) for 2.7 h; then it was quenched with saturated aqueous Na<sub>2</sub>S<sub>2</sub>O<sub>3</sub> (2.0 mL) and saturated aqueous NaHCO<sub>3</sub> (60.0 mL), and extracted with CH<sub>2</sub>Cl<sub>2</sub> (50.0 mL) four times. No 1,3,4-thiadiazole product **3a** was detected by TLC.

From **4a**: A custom-made undivided cell, equipped with a magnetic stirring bar, was charged under argon sequentially with thiosemicarbazide **4a** (0.5 mmol, 128 mg) and DDQ (1.2 equiv, 136 mg), followed by the addition of degassed CH<sub>3</sub>CN (10.8 mL) and water (1.2 mL). The mixture was stirred at 35 °C (oil bath) for 2.7 h; then it was quenched with saturated aqueous Na<sub>2</sub>S<sub>2</sub>O<sub>3</sub> (2.0 mL) and saturated aqueous NaHCO<sub>3</sub> (60.0 mL), and extracted with CH<sub>2</sub>Cl<sub>2</sub> (50.0 mL) four times. The residue obtained after evaporation of the solvent was purified by column chromatography on silica gel (petroleum ether–ethyl acetate–dichloromethane–triethylamine = 60:5:12:1) to afford the 2-amino-1,3,4-thiadiazole **3a**.

## 6. General procedure for quenching experiments

A custom-made undivided cell, equipped with a magnetic stirring bar, a graphite rod anode (Ø 6 mm) and a platinum plate cathode (15 mm × 15 mm × 0.3 mm, carefully

polished until shining), was charged under argon sequentially with 2-benzylidene-*N*-(4-fluorophenyl)hydrazine-1-carbothioamide **4j** (0.5 mmol, 137 mg), electrolyte *n*Bu<sub>4</sub>NBF<sub>4</sub> (1.0 equiv, 0.5 mmol), a quencher (2.0 equiv, 1.0 mmol), degassed CH<sub>3</sub>CN (8.8 mL), and water (1.2 mL), followed by the addition of a solution of DDQ (20 mol%, 0.1 mmol) in CH<sub>3</sub>CN (2.0 mL). The mixture was electrolyzed with stirring using a constant current of 10.0 mA at 35 °C (oil bath) for 2.7 h (2 F/mol), and the yield of product **3j** formed was determined by <sup>19</sup>F NMR analysis based on a 4,4'-difluoro-1,1'-biphenyl internal standard.

## IV. Spectroscopic investigations and DFT caclulations

### 1. Cyclic voltammetry studies

**General procedure:** Cyclic voltammeteries were performed in a three-electrode cell at room temperature. The working electrode was a platinum disk electrode, and the counter electrode was a platinum wire. The reference was an Ag/AgCl electrode submerged in a saturated aqueous KCl solution, and separated from reactions by a salt bridge. 10 mL of CH<sub>3</sub>CN/H<sub>2</sub>O (9:1, v/v) or CH<sub>3</sub>CN solution containing 1.0 mmol *n*Bu<sub>4</sub>NBF<sub>4</sub> was poured into the electrochemical cell. The scan rate was 0.05 V/s, ranging from 0 V to 1.8 V.

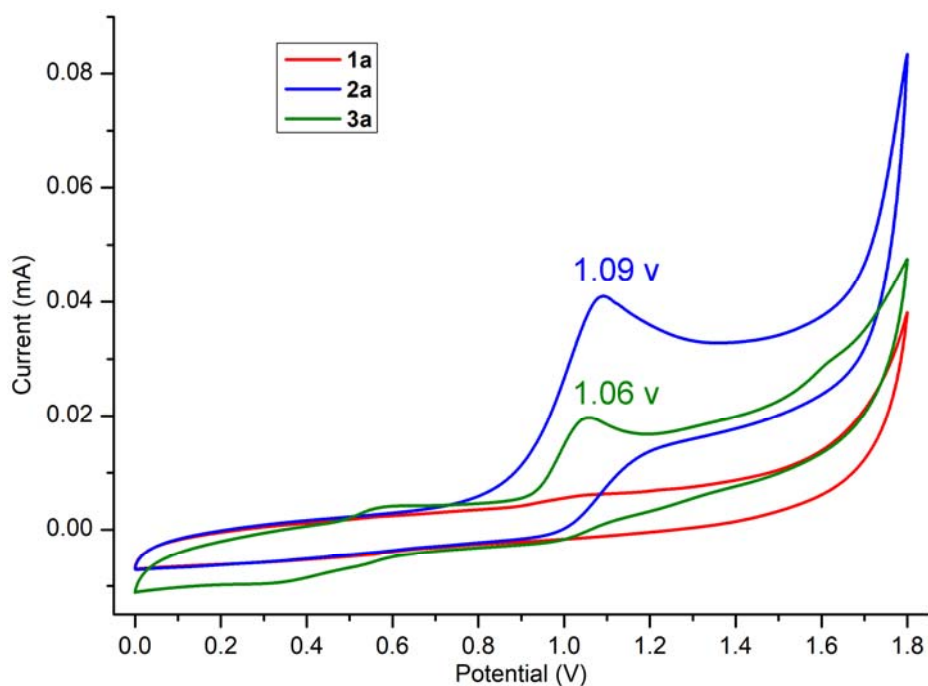

**Figure S3** Cyclic voltammograms of **1a**, **2a** and **3a** ( $10^{-3}$  M in CH<sub>3</sub>CN/H<sub>2</sub>O (9:1, v/v))

No obvious oxidation wave was observed in the cyclic voltammogram of intermediate **4a** in aqueous CH<sub>3</sub>CN in the region of 0.0–1.8 V vs. Ag/AgCl (Figure S4).

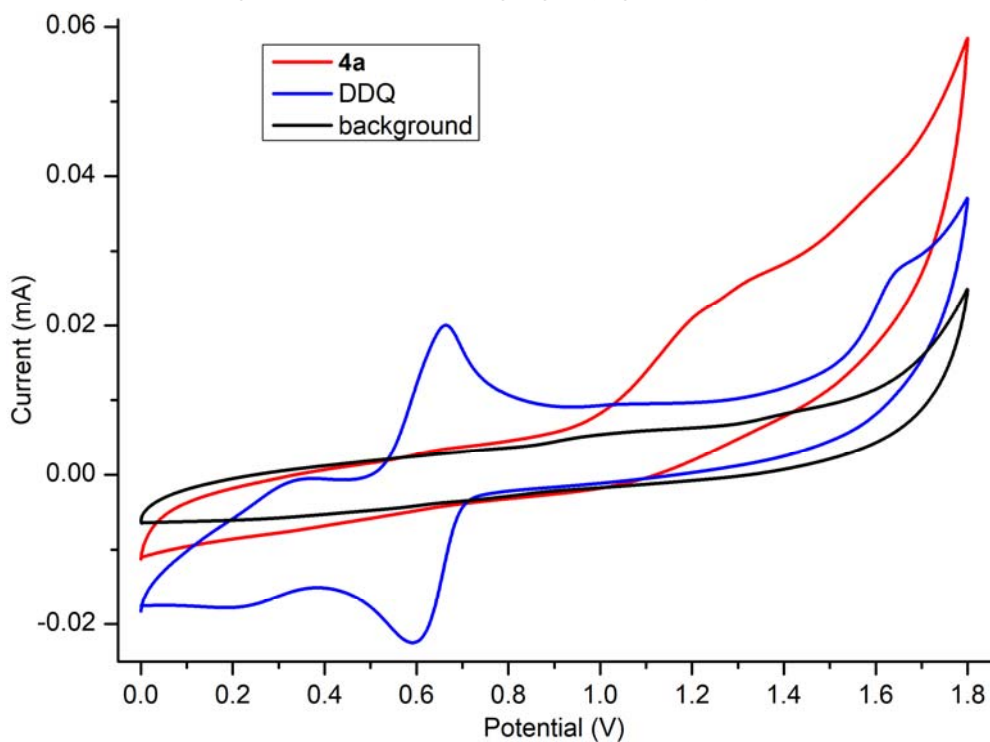

**Figure S4** Cyclic voltammograms of **4a** and DDQ ( $10^{-3}$  M in CH<sub>3</sub>CN/H<sub>2</sub>O (9:1, v/v))

Upon mixed with DDQ, the peak current diminished and the potential increased. Furthermore, the oxidation wave of DDQ disappeared (Figure S5).

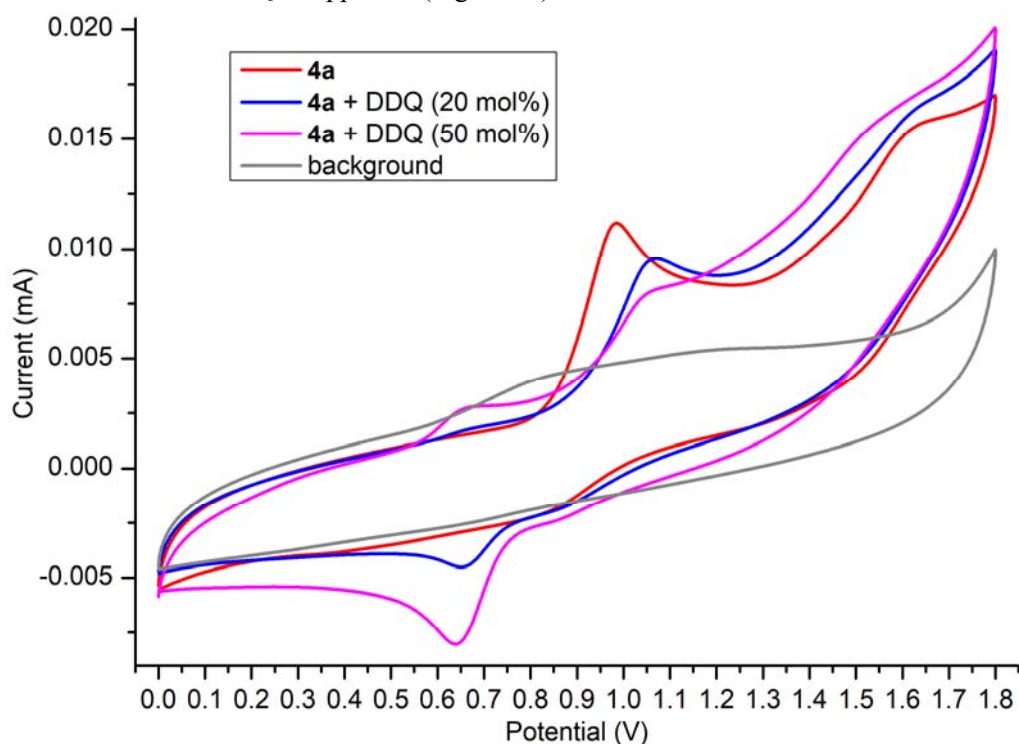

**Figure S5** Cyclic voltammograms of **4a** ( $10^{-3}$  M in CH<sub>3</sub>CN) and mixtures of **4a** ( $10^{-3}$  M in CH<sub>3</sub>CN) and DDQ

## 2. UV-Vis spectroscopic measurements

The following UV-Vis absorption spectra were collected on a UV-2450 UV-Visible spectrophotometer (Shimadzu, Japan). A significant bathochromic shift was observed.

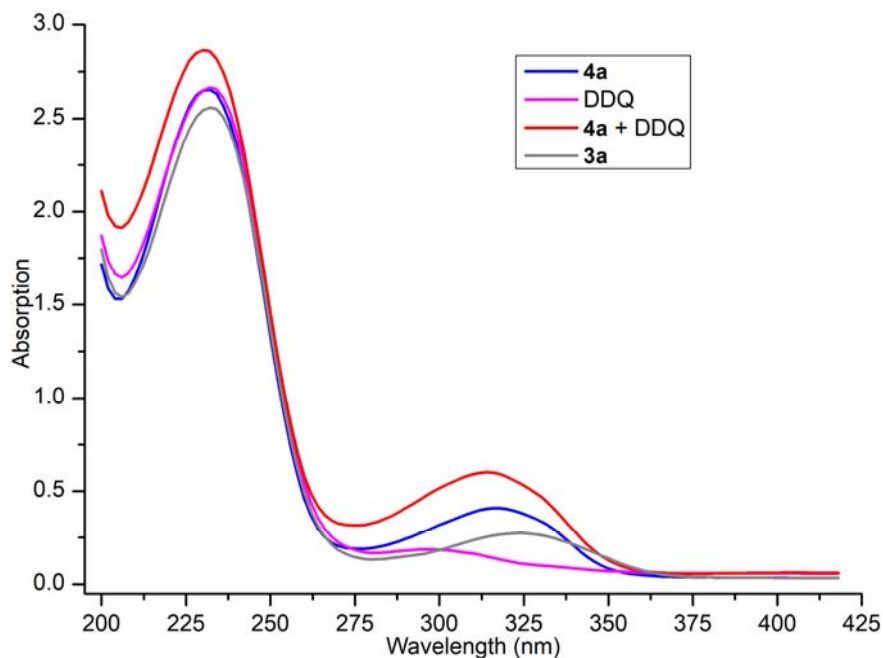

**Figure S6** UV-vis spectra of **4a**, DDQ, **3a** and an equimolar mixture of **4a** and DDQ ( $10^{-5}$  M in CH<sub>3</sub>CN/H<sub>2</sub>O (9:1, v/v))

The following UV-Vis absorption spectra were collected on a UV-3600 Plus UV-VIS-NIR spectrophotometer (Shimadzu, Japan). A significant bathochromic shift was observed.

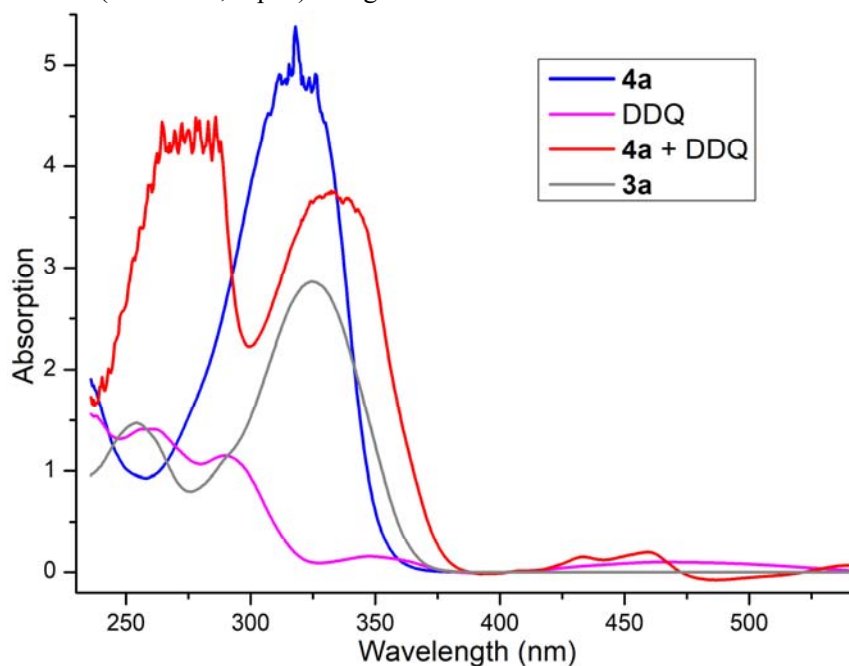

**Figure S7** UV-vis spectra of **4a**, DDQ, **3a** and an equimolar mixture of **4a** and DDQ ( $10^{-4}$  M in CH<sub>3</sub>CN/H<sub>2</sub>O (9:1, v/v))

### 3. Reaction kinetic profiles

4,4'-Difluoro-1,1'-biphenyl (1 equiv) was added as an internal standard to the reaction mixture before electrolysis. 0.1 mL of the crude reaction solution was taken out each time via a syringe and was subjected to  $^{19}\text{F}$  NMR analysis.

**Table S2 Kinetic profiles of reaction R1**

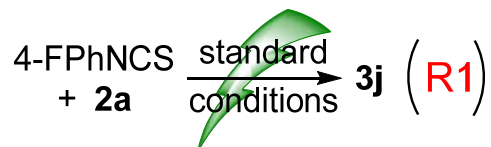

| time (h) | yield of <b>3j</b> (%) | yield of <b>4j</b> (%) | yield of 4-FPhNCS (%) |
|----------|------------------------|------------------------|-----------------------|
| 0        | 0 (not determined)     | 0 (not determined)     | 100 (not determined)  |
| 0.5      | 13.4                   | 75.9                   | 10                    |
| 1        | 27.7                   | 60.7                   | -                     |
| 1.5      | 47.3                   | 47.3                   | -                     |
| 2        | 68.8                   | 25.9                   | -                     |
| 2.5      | 91.3                   | 8.9                    | -                     |
| 2.7      | 95.5                   | 0                      | -                     |
| 3        | 83.0                   | -                      | -                     |
| 3.5      | 63.4                   | -                      | -                     |
| 4        | 36.6                   | -                      | -                     |

**Table S3 Kinetic profiles of reaction R2**

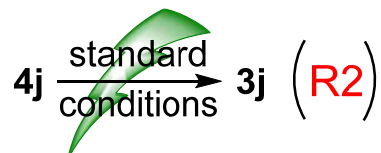

| time (h) | yield of <b>3j</b> (%) | yield of <b>4j</b> (%) |
|----------|------------------------|------------------------|
| 0        | 0 (not determined)     | 100 (not determined)   |
| 0.5      | 32.7                   | 67.2                   |
| 1        | 48.2                   | 50.0                   |
| 1.5      | 64.3                   | 33.0                   |
| 2        | 80.5                   | 19.5                   |
| 2.5      | 94.1                   | 5.9                    |
| 2.7      | 96.8                   | 3.2                    |
| 3        | 93.7                   | 0                      |
| 3.5      | 89.7                   | -                      |
| 4        | 82.5                   | -                      |

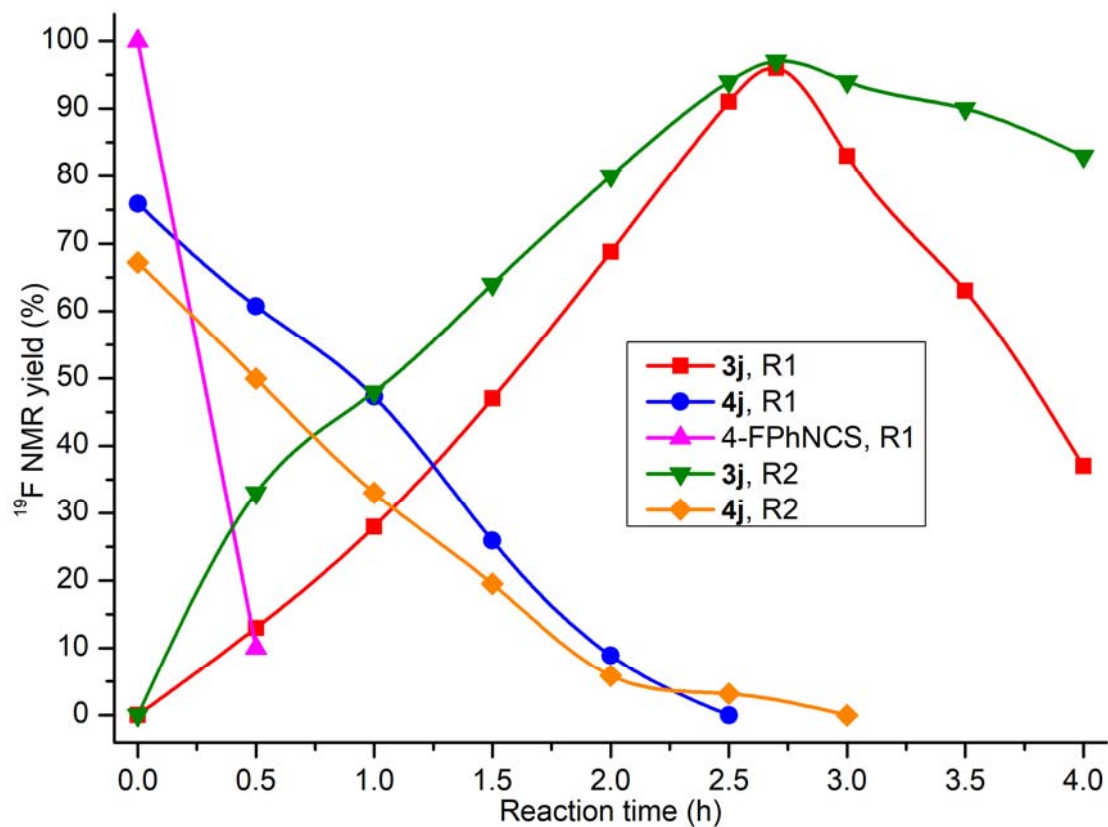

**Figure S8** Reaction kinetic profiles

#### 4. Hydrogen detection tests

The hydrogen detection tests were conducted with a H<sub>2</sub> detector (XLA-BX-H2, Figure S9), which was connected with a model reaction under standard conditions by a syringe with pumping off. The detector readings were recorded (Table S4), which reached 910 ppm within 7 min.

**Table S4** Readings of the H<sub>2</sub> detector

| time (min)          | 1   | 2   | 3   | 4   | 5   | 6   | 7   |
|---------------------|-----|-----|-----|-----|-----|-----|-----|
| concentration (ppm) | 610 | 675 | 710 | 765 | 813 | 854 | 910 |



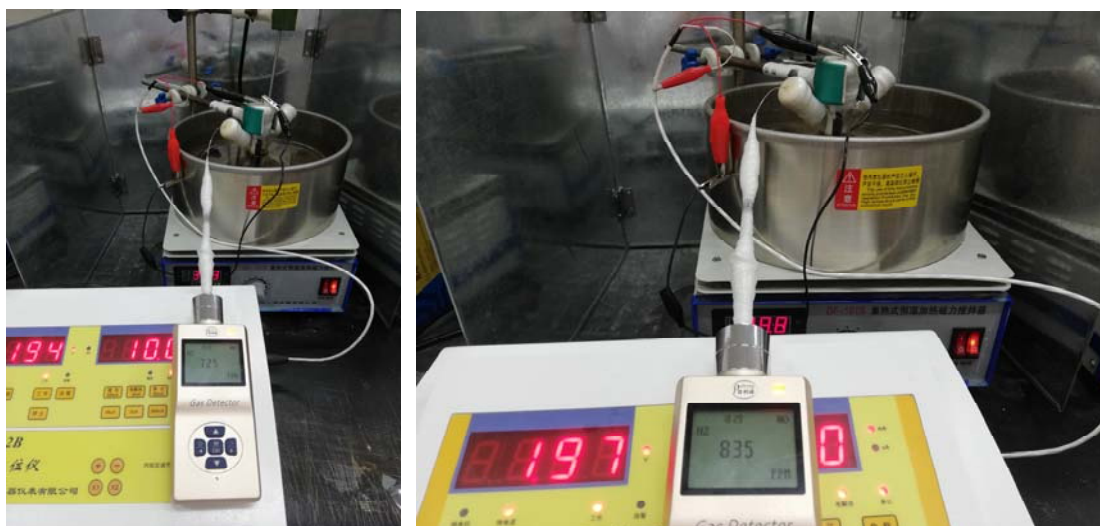

**Figure S9** Setup for hydrogen detection tests

## 5. Electricity on-off experiments

4,4'-Difluoro-1,1'-biphenyl (1 equiv) was added as an internal standard to the reaction mixture before electrolysis. 0.1 mL of the crude reaction solution was taken out each time via a syringe and was subjected to  $^{19}\text{F}$  NMR analysis.

**Table S5** Electricity on-off experiments using **4j** as the starting material

|            |      |      |      |      |      |      |
|------------|------|------|------|------|------|------|
| time (min) | 40   | 80   | 120  | 160  | 200  | 240  |
| yield (%)  | 37.5 | 36.6 | 58.9 | 58.9 | 83.1 | 83.0 |

## 6. DFT calculations

All calculations were performed using the Gaussian 16 package.<sup>3</sup> Geometries were optimised and harmonic frequencies were performed at the M062X/6-31g(d) level.<sup>4</sup> The solvation effects on the structures and molecular properties were accounted using

<sup>3</sup> Gaussian 16, Revision A.03, M. J. Frisch, G. W. Trucks, H. B. Schlegel, G. E. Scuseria, M. A. Robb, J. R. Cheeseman, G. Scalmani, V. Barone, G. A. Petersson, H. Nakatsuji, X. Li, M. Caricato, A. V. Marenich, J. Bloino, B. G. Janesko, R. Gomperts, B. Mennucci, H. P. Hratchian, J. V. Ortiz, A. F. Izmaylov, J. L. Sonnenberg, D. Williams-Young, F. Ding, F. Lipparini, F. Egidi, J. Goings, B. Peng, A. Petrone, T. Henderson, D. Ranasinghe, V. G. Zakrzewski, J. Gao, N. Rega, G. Zheng, W. Liang, M. Hada, M. Ehara, K. Toyota, R. Fukuda, J. Hasegawa, M. Ishida, T. Nakajima, Y. Honda, O. Kitao, H. Nakai, T. Vreven, K. Throssell, J. A. Montgomery, Jr., J. E. Peralta, F. Ogliaro, M. J. Bearpark, J. J. Heyd, E. N. Brothers, K. N. Kudin, V. N. Staroverov, T. A. Keith, R. Kobayashi, J. Normand, K. Raghavachari, A. P. Rendell, J. C. Burant, S. S. Iyengar, J. Tomasi, M. Cossi, J. M. Millam, M. Klene, C. Adamo, R. Cammi, J. W. Ochterski, R. L. Martin, K. Morokuma, O. Farkas, J. B. Foresman and D. J. Fox, Gaussian, Inc., Wallingford CT, 2016.

<sup>4</sup> Y. Zhao and D. G. Truhlar, *Theor. Chem. Acc.*, 2008, **120**, 215–241.



the integral-equation-formalism polarizable continuum model (IEF-PCM),<sup>5</sup> and the dielectric constant for 90% acetonitrile/water solvent,  $\epsilon = 39.95473$ , were used for all calculations. Harmonic vibration frequencies and the intrinsic reaction coordinates (IRC)<sup>6, 7</sup> were computed at the same level (IEF-PCM/M062X/6-31g(d)) to characterize the stationary points and the reaction path, respectively.

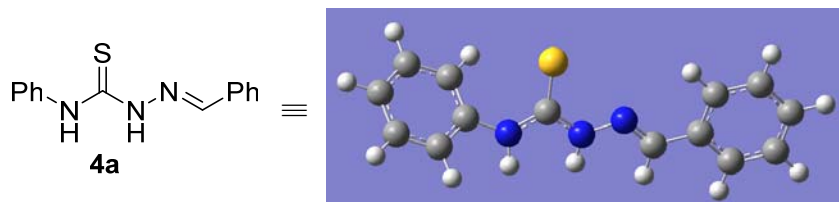

|   |             |             |             |  |
|---|-------------|-------------|-------------|--|
| 0 | 1           |             |             |  |
| S | 1.04604900  | 1.60890600  | -0.32272000 |  |
| C | 0.99289600  | -0.03995900 | 0.00276600  |  |
| C | -2.39720900 | -0.91817000 | 0.22184200  |  |
| H | -2.28181400 | -1.97345400 | 0.49533600  |  |
| C | -3.76675600 | -0.40869300 | 0.09060500  |  |
| C | -4.02562400 | 0.92679100  | -0.24819800 |  |
| C | -4.83611800 | -1.28229200 | 0.31142300  |  |
| C | -5.33513200 | 1.37339800  | -0.36202300 |  |
| H | -3.19212100 | 1.60072500  | -0.41863100 |  |
| C | -6.14839600 | -0.83110500 | 0.19629400  |  |
| H | -4.63709900 | -2.31806100 | 0.57387000  |  |
| C | -6.39989800 | 0.49651100  | -0.14018600 |  |
| H | -5.53063700 | 2.40837300  | -0.62421400 |  |
| H | -6.97217300 | -1.51601800 | 0.36960200  |  |
| H | -7.42205700 | 0.85037400  | -0.23019700 |  |
| N | -1.38637900 | -0.16031300 | 0.02458300  |  |
| C | 3.44826900  | -0.44846700 | 0.06835900  |  |
| C | 3.94100300  | 0.55312700  | 0.90601600  |  |
| C | 4.30836000  | -1.14259100 | -0.78127900 |  |
| C | 5.29396100  | 0.87231200  | 0.86760500  |  |
| H | 3.26525500  | 1.06947200  | 1.57784000  |  |

<sup>5</sup> J. Tomasi, B. Mennucci and R. Cammi, *Chem. Rev.*, 2005, **105**, 2999–3094.

<sup>6</sup> C. Gonzalez and H. B. Schlegel, *J. Phys. Chem.*, 1990, **94**, 5523–5527.

<sup>7</sup> C. Gonzalez and H. B. Schlegel, *J. Chem. Phys.*, 1989, **90**, 2154–2161.

|   |             |             |             |
|---|-------------|-------------|-------------|
| C | 5.66486300  | -0.82732900 | -0.80108300 |
| H | 3.91178100  | -1.92239100 | -1.42480200 |
| C | 6.15968000  | 0.18516000  | 0.01666500  |
| H | 5.67547800  | 1.65409200  | 1.51656100  |
| H | 6.33083200  | -1.37125800 | -1.46307800 |
| H | 7.21539500  | 0.43529600  | -0.00369400 |
| N | 2.08280900  | -0.84106800 | 0.11186000  |
| H | 1.92964800  | -1.84429400 | 0.09766000  |
| N | -0.16784000 | -0.73430200 | 0.17293100  |
| H | -0.12880300 | -1.71772500 | 0.43880600  |

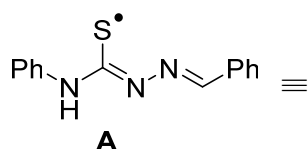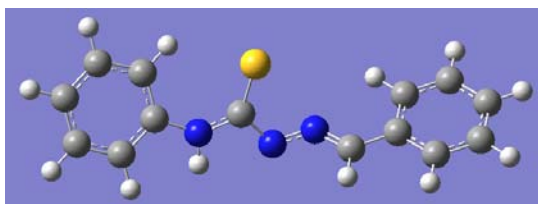

0 2

|   |             |             |             |
|---|-------------|-------------|-------------|
| C | 4.35932400  | 1.34582000  | -0.20497500 |
| C | 3.42716400  | 0.29845900  | -0.20175600 |
| C | 3.86097800  | -1.01668200 | -0.00533300 |
| C | 5.21626800  | -1.26201100 | 0.20383000  |
| C | 6.14248200  | -0.22314600 | 0.21412700  |
| C | 5.70615900  | 1.08462900  | 0.00264000  |
| H | 4.01796900  | 2.36484900  | -0.36510200 |
| H | 3.15364700  | -1.83302300 | -0.02353100 |
| H | 5.54624800  | -2.28498200 | 0.35449800  |
| H | 7.19470900  | -0.42887800 | 0.38002100  |
| H | 6.41495800  | 1.90624200  | 0.00158500  |
| N | 2.09087900  | 0.66022900  | -0.45659500 |
| H | 1.97150700  | 1.58022300  | -0.87265000 |
| C | 0.91215100  | 0.06555200  | -0.15817000 |
| S | 0.67253500  | -1.39281400 | 0.63344200  |
| C | -2.28385300 | 0.94359600  | 0.21048600  |
| C | -3.64807200 | 0.42741900  | 0.08863500  |
| C | -3.95519600 | -0.63686300 | -0.77004700 |
| C | -4.65924100 | 1.01955000  | 0.85158800  |

|   |             |             |             |
|---|-------------|-------------|-------------|
| C | -5.26189400 | -1.09493000 | -0.86349300 |
| H | -3.16285600 | -1.09679300 | -1.35294200 |
| C | -5.96834600 | 0.55672100  | 0.75533000  |
| H | -4.41733000 | 1.84298600  | 1.51799200  |
| C | -6.27014200 | -0.49905400 | -0.10164700 |
| H | -5.49884400 | -1.91926200 | -1.52820100 |
| H | -6.75027100 | 1.01905900  | 1.34861200  |
| H | -7.29039200 | -0.86166700 | -0.17653000 |
| N | -0.10882300 | 0.91123000  | -0.58227200 |
| N | -1.31230600 | 0.45446300  | -0.45505800 |
| H | -2.09486900 | 1.76044600  | 0.91137000  |

TS1 ≡

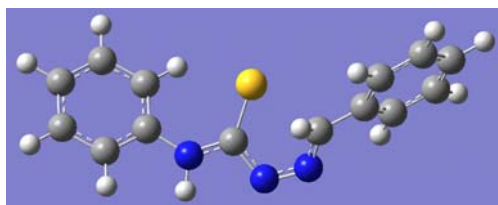

0 2

|   |             |             |             |
|---|-------------|-------------|-------------|
| C | -4.34530700 | 0.83575900  | -0.49220400 |
| C | -3.19111000 | 0.31906200  | 0.10512800  |
| C | -3.21195600 | -0.95198800 | 0.68380400  |
| C | -4.38070800 | -1.70706700 | 0.63185800  |
| C | -5.52947900 | -1.20239700 | 0.02746700  |
| C | -5.50849100 | 0.07636900  | -0.52734000 |
| H | -4.32119800 | 1.82767400  | -0.93430600 |
| H | -2.33341700 | -1.33914500 | 1.18489800  |
| H | -4.39121900 | -2.69459400 | 1.08181900  |
| H | -6.43595300 | -1.79759100 | -0.00534500 |
| H | -6.39801600 | 0.48485000  | -0.99575800 |
| N | -2.05370000 | 1.15543300  | 0.14020600  |
| H | -2.23437600 | 2.15602000  | 0.14176300  |
| C | -0.74191100 | 0.86184600  | 0.06368800  |
| S | -0.07183600 | -0.69699900 | -0.10119300 |
| C | 1.80197300  | 0.75124000  | -0.58333200 |
| C | 3.12036300  | 0.18578200  | -0.28048000 |
| C | 3.73476900  | 0.41615700  | 0.95706600  |

|   |            |             |             |
|---|------------|-------------|-------------|
| C | 3.75740300 | -0.61461000 | -1.23442600 |
| C | 4.97923700 | -0.13820200 | 1.22676700  |
| H | 3.22918700 | 1.03406900  | 1.69273400  |
| C | 5.00036300 | -1.17522000 | -0.95815800 |
| H | 3.27486500 | -0.79605600 | -2.19126700 |
| C | 5.61235700 | -0.93553400 | 0.27096600  |
| H | 5.45735200 | 0.04564300  | 2.18344800  |
| H | 5.49188800 | -1.79508700 | -1.70075600 |
| H | 6.58306400 | -1.37077400 | 0.48649200  |
| N | 0.04211400 | 1.98852000  | 0.15592300  |
| N | 1.32515400 | 1.77377500  | 0.12408700  |
| H | 1.44720300 | 0.64568500  | -1.61097200 |

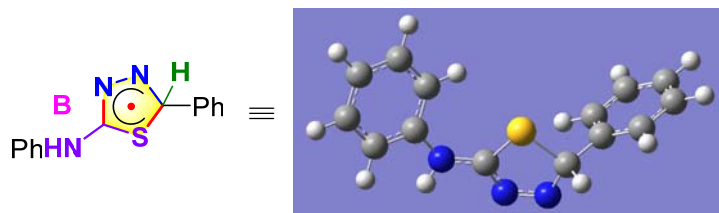

0 2

|   |             |             |             |
|---|-------------|-------------|-------------|
| C | 4.25319400  | 0.70927600  | -0.08192100 |
| C | 2.95322500  | 0.24651100  | -0.30897100 |
| C | 2.69233200  | -1.12602700 | -0.32826100 |
| C | 3.72709500  | -2.02411600 | -0.07901700 |
| C | 5.02124300  | -1.56854600 | 0.15838100  |
| C | 5.28068700  | -0.19838000 | 0.14459300  |
| H | 4.44775000  | 1.77764400  | -0.07435700 |
| H | 1.70019700  | -1.49311400 | -0.56691600 |
| H | 3.51725900  | -3.08874400 | -0.09165300 |
| H | 5.82366800  | -2.27457700 | 0.34389500  |
| H | 6.28639900  | 0.16916800  | 0.32090300  |
| N | 1.94326800  | 1.19958800  | -0.55640200 |
| H | 2.22747100  | 2.07611100  | -0.98285100 |
| C | 0.65228800  | 1.18433000  | -0.16201900 |
| S | -0.07370400 | -0.05371100 | 0.84521100  |
| C | -1.63137900 | 0.95974100  | 0.80464600  |
| C | -2.81250400 | 0.16036100  | 0.30463300  |

|   |             |             |             |
|---|-------------|-------------|-------------|
| C | -2.94120100 | -0.11309200 | -1.05951400 |
| C | -3.77243000 | -0.31340100 | 1.19684000  |
| C | -4.02096400 | -0.85556800 | -1.52410800 |
| H | -2.19282200 | 0.26401600  | -1.75223600 |
| C | -4.85398100 | -1.06084300 | 0.73182800  |
| H | -3.67551200 | -0.09644100 | 2.25745800  |
| C | -4.97927400 | -1.33212800 | -0.62787000 |
| H | -4.11810400 | -1.06267500 | -2.58521000 |
| H | -5.59817100 | -1.42652100 | 1.43225600  |
| H | -5.82211300 | -1.91145200 | -0.99155300 |
| N | -0.14652100 | 2.18655700  | -0.50573800 |
| N | -1.36875400 | 2.13102700  | -0.03484200 |
| H | -1.82270500 | 1.29704300  | 1.83033700  |

TS2 ≡

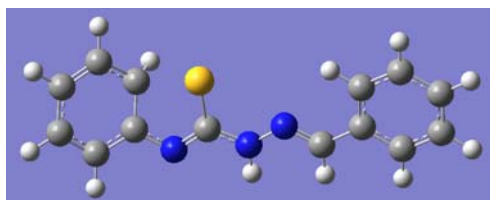

0 2

|   |             |             |             |
|---|-------------|-------------|-------------|
| C | 3.28615800  | 0.63388500  | 0.70068700  |
| C | 3.34823300  | -0.73648400 | 0.19716500  |
| C | 4.47304400  | -1.19303100 | -0.48171300 |
| C | 5.50629900  | -0.31176400 | -0.78326700 |
| C | 5.42676700  | 1.05138600  | -0.40152700 |
| H | 4.49246200  | -2.22231100 | -0.82507800 |
| H | 6.36848400  | -0.66258000 | -1.33994300 |
| H | 6.24325300  | 1.72040000  | -0.65457400 |
| N | 2.18592800  | -1.47029600 | 0.28573000  |
| S | 1.29754400  | 1.05919200  | 0.07091800  |
| C | 1.14070400  | -0.69221300 | 0.23604300  |
| H | -0.15167100 | -2.26454200 | 0.29968700  |
| C | -2.33441800 | -1.11033200 | 0.11229000  |
| H | -2.38852500 | -2.20247600 | 0.17581100  |
| C | -3.60027500 | -0.37991200 | -0.01019500 |
| C | -3.63926200 | 1.01936000  | -0.09091800 |

|   |             |             |             |
|---|-------------|-------------|-------------|
| C | -4.79678000 | -1.10315000 | -0.04862100 |
| C | -4.85678300 | 1.67608900  | -0.20813400 |
| H | -2.70918900 | 1.57801600  | -0.06036700 |
| C | -6.01632000 | -0.44138500 | -0.16598300 |
| H | -4.76915700 | -2.18790700 | 0.01321200  |
| C | -6.04877200 | 0.94850800  | -0.24604200 |
| H | -4.88050200 | 2.75951600  | -0.27027000 |
| H | -6.93920200 | -1.01170900 | -0.19504300 |
| H | -6.99835300 | 1.46622900  | -0.33766700 |
| N | -0.09749100 | -1.24727400 | 0.26068400  |
| N | -1.21314500 | -0.49417700 | 0.14254400  |
| H | 2.96979500  | 0.72064300  | 1.74257700  |
| C | 4.36586100  | 1.52168100  | 0.32549000  |
| H | 4.34811600  | 2.54606000  | 0.68260600  |

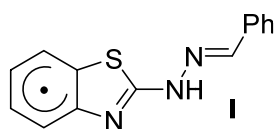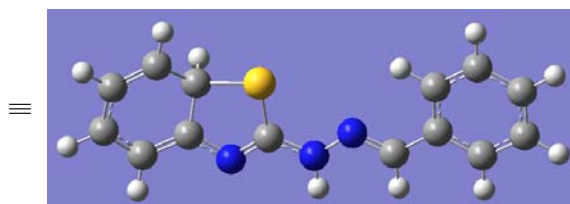

0 2

|   |             |             |             |
|---|-------------|-------------|-------------|
| C | 3.09860900  | 0.69911600  | 0.56180800  |
| C | 3.34243500  | -0.73829900 | 0.17223800  |
| C | 4.59977700  | -1.15463100 | -0.21897100 |
| C | 5.59441900  | -0.20886700 | -0.48744900 |
| C | 5.28700600  | 1.18675700  | -0.45727100 |
| H | 4.77055900  | -2.21215400 | -0.39590800 |
| H | 6.57531500  | -0.53325500 | -0.81537100 |
| H | 6.03707800  | 1.89273700  | -0.80198100 |
| N | 2.22355300  | -1.53465000 | 0.19278900  |
| S | 1.29921900  | 0.95872300  | 0.18420600  |
| C | 1.14653500  | -0.80964100 | 0.19324200  |
| H | -0.15943100 | -2.37580700 | 0.09048300  |
| C | -2.32443600 | -1.15716100 | 0.00664100  |
| H | -2.40382200 | -2.24835700 | -0.03895100 |
| C | -3.57137300 | -0.38814900 | -0.04554800 |

|   |             |             |             |
|---|-------------|-------------|-------------|
| C | -3.57858200 | 1.01277700  | 0.01498800  |
| C | -4.78387200 | -1.07640500 | -0.15947100 |
| C | -4.78056900 | 1.70536600  | -0.03858100 |
| H | -2.63676900 | 1.54494900  | 0.10422900  |
| C | -5.98754800 | -0.37866400 | -0.21274900 |
| H | -4.78093900 | -2.16223700 | -0.20673600 |
| C | -5.98843000 | 1.01263700  | -0.15252200 |
| H | -4.77977000 | 2.78979500  | 0.00873000  |
| H | -6.92288600 | -0.92193400 | -0.30134400 |
| H | -6.92565800 | 1.55849900  | -0.19399600 |
| N | -0.08947000 | -1.36089100 | 0.14821400  |
| N | -1.18792100 | -0.57537100 | 0.10169800  |
| H | 3.13543900  | 0.77809400  | 1.66299000  |
| C | 4.08239400  | 1.65076900  | -0.03412500 |
| H | 3.86205000  | 2.71285500  | -0.01172400 |

## V. Spectral data of products

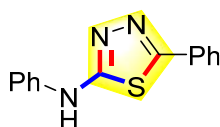

**3a**, *N*,5-diphenyl-1,3,4-thiadiazol-2-amine,<sup>8</sup> white solid: mp 206–207 °C. <sup>1</sup>H NMR (400 MHz, DMSO-*d*<sub>6</sub>) δ 10.57 (s, 1H), 7.88 – 7.86 (m, 2H), 7.66 (d, *J* = 8.0 Hz, 2H), 7.52 (h, *J* = 3.6 Hz, 3H), 7.38 (t, *J* = 7.8 Hz, 2H), 7.03 (t, *J* = 7.3 Hz, 1H). <sup>1</sup>H NMR (400 MHz, CDCl<sub>3</sub>) δ 9.65 (brs, 1H), 7.88 (dd, *J* = 7.5, 1.9 Hz, 2H), 7.49 – 7.40 (m, 7H), 7.14 (t, *J* = 7.2 Hz, 1H). <sup>13</sup>C{<sup>1</sup>H} NMR (100 MHz, DMSO-*d*<sub>6</sub>) δ 164.5, 158.0, 140.9, 130.74, 130.72, 129.7, 129.6, 127.2, 122.6, 118.0. <sup>13</sup>C{<sup>1</sup>H} NMR (100 MHz, CDCl<sub>3</sub>) δ 166.1 (br), 157.9 (br), 140.3, 130.7, 130.1, 129.7, 129.0, 127.0, 123.7, 118.4. HRMS (ESI-TOF) Calcd for C<sub>14</sub>H<sub>12</sub>N<sub>3</sub>S<sup>+</sup> ([M+H]<sup>+</sup>) 254.0746. Found 254.0759.

<sup>8</sup> S. J. Singh, S. Rajamanickam, A. Gogoi and B. K. Patel, *Tetrahedron Lett.*, 2016, **57**, 1044–1047

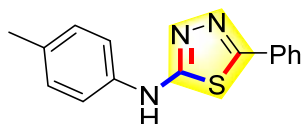

**3b**, 5-phenyl-*N*-(*p*-tolyl)-1,3,4-thiadiazol-2-amine,<sup>9</sup> pale yellow solid: mp 179–180 °C. <sup>1</sup>H NMR (400 MHz, DMSO-*d*<sub>6</sub>) δ 10.46 (s, 1H), 7.87 – 7.83 (m, 2H), 7.56 – 7.47 (m, 5H), 7.18 (d, *J* = 8.2 Hz, 2H), 2.28 (s, 3H). <sup>13</sup>C{<sup>1</sup>H} NMR (100 MHz, DMSO-*d*<sub>6</sub>) δ 164.7, 157.7, 138.6, 131.6, 130.8, 130.6, 130.0, 129.7, 127.2, 118.1, 20.8. HRMS (ESI-TOF) Calcd for C<sub>15</sub>H<sub>14</sub>N<sub>3</sub>S<sup>+</sup> ([M+H]<sup>+</sup>) 268.0903. Found 268.0901.

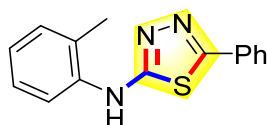

**3c**, 5-phenyl-*N*-(*o*-tolyl)-1,3,4-thiadiazol-2-amine,<sup>8</sup> pale yellow solid: mp 140–141 °C. <sup>1</sup>H NMR (400 MHz, DMSO-*d*<sub>6</sub>) δ 9.66 (s, 1H), 7.86 – 7.81 (m, 3H), 7.52 – 7.46 (m, 3H), 7.25 (dd, *J* = 9.6, 7.4 Hz, 2H), 7.08 (dd, *J* = 7.3, 7.3 Hz, 1H), 2.51 (s, 3H). <sup>13</sup>C{<sup>1</sup>H} NMR (100 MHz, DMSO-*d*<sub>6</sub>) δ 167.0 (br), 157.9 (br), 139.6 (br), 131.2, 131.0, 130.5, 130.0, 129.7, 127.2, 127.1, 124.8, 122.2, 18.4. HRMS (ESI-TOF) Calcd for C<sub>15</sub>H<sub>14</sub>N<sub>3</sub>S<sup>+</sup> ([M+H]<sup>+</sup>) 268.0903. Found 268.0888.

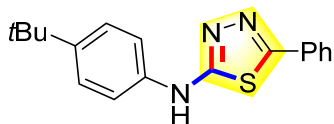

**3d**, *N*-(4-(*tert*-butyl)phenyl)-5-phenyl-1,3,4-thiadiazol-2-amine, white solid: mp 224–225 °C. <sup>1</sup>H NMR (400 MHz, DMSO-*d*<sub>6</sub>) δ 10.46 (s, 1H), 7.86 – 7.84 (m, 2H), 7.57 – 7.47 (m, 5H), 7.39 (d, *J* = 8.7 Hz, 2H), 1.28 (s, 9H). <sup>13</sup>C{<sup>1</sup>H} NMR (100 MHz, DMSO-*d*<sub>6</sub>) δ 164.8, 157.7, 145.1, 138.5, 130.8, 130.6, 129.7, 127.2, 126.2, 117.9, 34.4, 31.7. HRMS (ESI-TOF) Calcd for C<sub>18</sub>H<sub>20</sub>N<sub>3</sub>S<sup>+</sup> ([M+H]<sup>+</sup>) 310.1372. Found 310.1375.

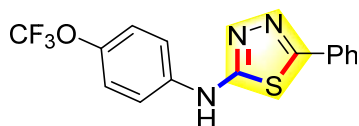

**3e**, 5-phenyl-*N*-(4-(trifluoromethoxy)phenyl)-1,3,4-thiadiazol-2-amine, yellowish

<sup>9</sup> U. Salar, M. Taha, N. H. Ismail, K. M. Khan, S. Imran, S. Perveen, A. Wadood, M. Riaz, *Bioorg. Med. Chem.*, 2016, **24**, 1909–1918.



solid: mp 220–221 °C.  $^1\text{H}$  NMR (400 MHz,  $\text{DMSO-}d_6$ )  $\delta$  10.77 (s, 1H), 7.88 – 7.86 (m, 2H), 7.78 (d,  $J = 9.0$  Hz, 2H), 7.55 – 7.49 (m, 3H), 7.38 (d,  $J = 8.5$  Hz, 2H).  $^{13}\text{C}\{^1\text{H}\}$  NMR (100 MHz,  $\text{DMSO-}d_6$ )  $\delta$  164.3, 158.6, 143.0 (q,  $J = 1.7$  Hz), 140.1, 130.8, 130.6, 129.8, 127.3, 122.5, 120.7 (q,  $J = 255.3$  Hz), 119.2.  $^{19}\text{F}$  NMR (376 MHz,  $\text{DMSO-}d_6$ )  $\delta$  -57.11 – -57.12 (m, 3F). HRMS (ESI-TOF) Calcd for  $\text{C}_{15}\text{H}_{11}\text{F}_3\text{N}_3\text{OS}^+$  ( $[\text{M}+\text{H}]^+$ ) 338.0569. Found 338.0580.

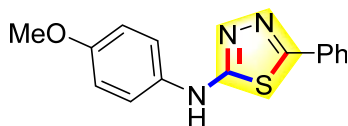

**3f**, *N*-(4-methoxyphenyl)-5-phenyl-1,3,4-thiadiazol-2-amine,<sup>10</sup> pale yellow solid: mp 175–176 °C.  $^1\text{H}$  NMR (400 MHz,  $\text{DMSO-}d_6$ )  $\delta$  10.33 (s, 1H), 7.85 – 7.82 (m, 2H), 7.56 (d,  $J = 9.0$  Hz, 2H), 7.54 – 7.47 (m, 3H), 6.96 (d,  $J = 9.0$  Hz, 2H), 3.75 (s, 3H).  $^{13}\text{C}\{^1\text{H}\}$  NMR (100 MHz,  $\text{DMSO-}d_6$ )  $\delta$  165.2, 157.3, 155.2, 134.5, 130.9, 130.5, 129.7, 127.1, 119.9, 114.8, 55.7. HRMS (ESI-TOF) Calcd for  $\text{C}_{15}\text{H}_{14}\text{N}_3\text{OS}^+$  ( $[\text{M}+\text{H}]^+$ ) 284.0852. Found 284.0856.

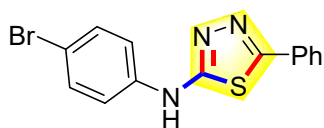

**3g**, *N*-(4-bromophenyl)-5-phenyl-1,3,4-thiadiazol-2-amine,<sup>11</sup> yellowish solid: mp 223–224 °C.  $^1\text{H}$  NMR (400 MHz,  $\text{DMSO-}d_6$ )  $\delta$  10.72 (s, 1H), 7.88 – 7.85 (m, 2H), 7.65 (d,  $J = 8.5$  Hz, 2H), 7.55 – 7.51 (m, 5H).  $^{13}\text{C}\{^1\text{H}\}$  NMR (100 MHz,  $\text{DMSO-}d_6$ )  $\delta$  164.1, 158.5, 140.2, 132.3, 130.9, 130.6, 129.8, 127.3, 119.9, 113.8. HRMS (ESI-TOF) Calcd for  $\text{C}_{14}\text{H}_{11}\text{BrN}_3\text{S}^+$  ( $[\text{M}+\text{H}]^+$ ) 331.9852. Found 331.9854.

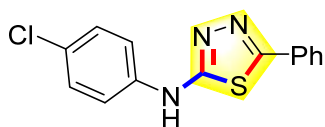

**3h**, *N*-(4-chlorophenyl)-5-phenyl-1,3,4-thiadiazol-2-amine, yellowish solid: mp 222–223 °C.  $^1\text{H}$  NMR (400 MHz,  $\text{DMSO-}d_6$ )  $\delta$  10.71 (s, 1H), 7.88 – 7.85 (m, 2H), 7.71 (d,  $J = 8.9$  Hz, 2H), 7.55 – 7.48 (m, 3H), 7.42 (d,  $J = 8.9$  Hz, 2H).  $^{13}\text{C}\{^1\text{H}\}$  NMR

<sup>10</sup> S.-J. Yang, S.-H. Lee, H.-J. Kwak and Y.-D. Gong, *J. Org. Chem.*, 2013, **78**, 438–444.

<sup>11</sup> E. E. Oruç, S. Rollas, F. Kandemirli, N. Shvets and A. S. Dimoglo, *J. Med. Chem.*, 2004, **47**, 6760–6767.

(100 MHz, DMSO-*d*<sub>6</sub>)  $\delta$  164.2, 158.5, 139.8, 130.8, 130.6, 129.8, 129.4, 127.3, 125.9, 119.5. HRMS (ESI-TOF) Calcd for C<sub>14</sub>H<sub>11</sub>ClN<sub>3</sub>S<sup>+</sup> ([M+H]<sup>+</sup>) 288.0357. Found 288.0359.

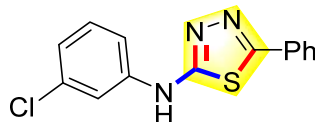

**3i**, *N*-(3-chlorophenyl)-5-phenyl-1,3,4-thiadiazol-2-amine, white solid: mp 198–199 °C. <sup>1</sup>H NMR (400 MHz, DMSO-*d*<sub>6</sub>)  $\delta$  10.76 (s, 1H), 7.96 (dd, *J* = 2.1, 2.1 Hz, 1H), 7.89 – 7.87 (m, 2H), 7.56 – 7.51 (m, 3H), 7.47 (dd, *J* = 7.8, 1.5 Hz, 1H), 7.39 (dd, *J* = 8.0, 8.0 Hz, 1H), 7.08 (dd, *J* = 7.8, 1.2 Hz, 1H). <sup>13</sup>C{<sup>1</sup>H} NMR (100 MHz, DMSO-*d*<sub>6</sub>)  $\delta$  164.1, 158.8, 142.2, 134.0, 131.2, 130.9, 130.6, 129.8, 127.3, 122.0, 117.4, 116.4. HRMS (ESI-TOF) Calcd for C<sub>14</sub>H<sub>11</sub>ClN<sub>3</sub>S<sup>+</sup> ([M+H]<sup>+</sup>) 288.0357. Found 288.0353.

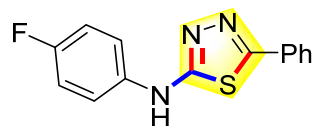

**3j**, *N*-(4-fluorophenyl)-5-phenyl-1,3,4-thiadiazol-2-amine,<sup>10</sup> yellowish solid: mp 204–205 °C. <sup>1</sup>H NMR (400 MHz, DMSO-*d*<sub>6</sub>)  $\delta$  10.59 (s, 1H), 7.87 – 7.84 (m, 2H), 7.72 – 7.66 (m, 2H), 7.55 – 7.47 (m, 3H), 7.25 – 7.19 (m, 2H). <sup>13</sup>C{<sup>1</sup>H} NMR (100 MHz, DMSO-*d*<sub>6</sub>)  $\delta$  164.6, 158.1, 157.8 (d, *J* = 238.6 Hz), 137.4 (d, *J* = 2.2 Hz), 130.74, 130.68, 129.7, 127.2, 119.7 (d, *J* = 7.8 Hz), 116.2 (d, *J* = 22.4 Hz). <sup>19</sup>F NMR (376 MHz, DMSO-*d*<sub>6</sub>)  $\delta$  -120.96 – -121.03 (m, 1F). HRMS (ESI-TOF) Calcd for C<sub>14</sub>H<sub>11</sub>FN<sub>3</sub>S<sup>+</sup> ([M+H]<sup>+</sup>) 272.0652. Found 272.0653.

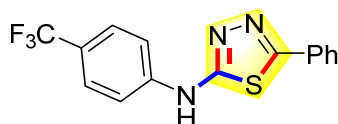

**3k**, 5-phenyl-*N*-(4-(trifluoromethyl)phenyl)-1,3,4-thiadiazol-2-amine, yellowish solid: mp 250–251 °C. <sup>1</sup>H NMR (400 MHz, DMSO-*d*<sub>6</sub>)  $\delta$  10.99 (brs, 1H), 7.89 – 7.86 (m, 4H), 7.72 (d, *J* = 8.4 Hz, 2H), 7.55 – 7.51 (m, 3H). <sup>13</sup>C{<sup>1</sup>H} NMR (100 MHz, DMSO-*d*<sub>6</sub>)  $\delta$  163.9, 159.3, 144.1, 131.0, 130.5, 129.8, 127.4, 126.9 (q, *J* = 3.9 Hz), 125.0 (q, *J* = 271.1 Hz), 122.2 (q, *J* = 32.0 Hz), 117.7. <sup>19</sup>F NMR (376 MHz, DMSO-*d*<sub>6</sub>)  $\delta$  -60.00 (s, 3F). HRMS (ESI-TOF) Calcd for C<sub>15</sub>H<sub>11</sub>F<sub>3</sub>N<sub>3</sub>S<sup>+</sup> ([M+H]<sup>+</sup>) 322.0620. Found 322.0633.

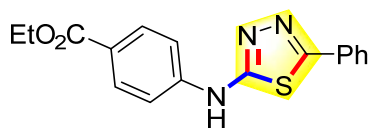

**3l**, ethyl 4-((5-phenyl-1,3,4-thiadiazol-2-yl)amino)benzoate, white solid: mp 208–209 °C.  $^1\text{H}$  NMR (400 MHz,  $\text{DMSO-}d_6$ )  $\delta$  10.97 (s, 1H), 7.97 (d,  $J = 8.9$  Hz, 2H), 7.90 – 7.88 (m, 2H), 7.79 (d,  $J = 8.9$  Hz, 2H), 7.56 – 7.49 (m, 3H), 4.29 (q,  $J = 7.1$  Hz, 2H), 1.32 (t,  $J = 7.1$  Hz, 3H).  $^{13}\text{C}\{^1\text{H}\}$  NMR (100 MHz,  $\text{DMSO-}d_6$ )  $\delta$  165.8, 163.8, 159.3, 144.9, 131.1, 131.0, 130.5, 129.8, 127.4, 123.2, 117.3, 60.8, 14.7. HRMS (ESI-TOF) Calcd for  $\text{C}_{17}\text{H}_{16}\text{N}_3\text{O}_2\text{S}^+$  ( $[\text{M}+\text{H}]^+$ ) 326.0958. Found 326.0956.

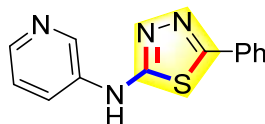

**3m**, 5-phenyl-*N*-(pyridin-3-yl)-1,3,4-thiadiazol-2-amine, yellow solid: mp 226–227 °C.  $^1\text{H}$  NMR (400 MHz,  $\text{DMSO-}d_6$ )  $\delta$  10.77 (s, 1H), 8.80 (d,  $J = 2.7$  Hz, 1H), 8.25 – 8.21 (m, 2H), 7.89 – 7.87 (m, 2H), 7.56 – 7.49 (m, 3H), 7.42 (dd,  $J = 8.3, 4.7$  Hz, 1H).  $^{13}\text{C}\{^1\text{H}\}$  NMR (100 MHz,  $\text{DMSO-}d_6$ )  $\delta$  164.2, 159.0, 143.3, 139.7, 137.7, 130.9, 130.6, 129.8, 127.3, 124.6, 124.4. HRMS (ESI-TOF) Calcd for  $\text{C}_{13}\text{H}_{11}\text{N}_4\text{S}^+$  ( $[\text{M}+\text{H}]^+$ ) 255.0699. Found 255.0687.

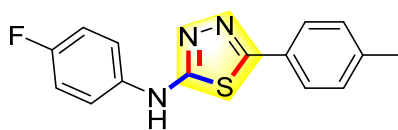

**3n**, *N*-(4-fluorophenyl)-5-(*p*-tolyl)-1,3,4-thiadiazol-2-amine, yellowish solid: mp 210–211 °C.  $^1\text{H}$  NMR (400 MHz,  $\text{DMSO-}d_6$ )  $\delta$  10.52 (s, 1H), 7.74 (d,  $J = 8.2$  Hz, 2H), 7.70 – 7.66 (m, 2H), 7.32 (d,  $J = 7.9$  Hz, 2H), 7.21 (dd,  $J = 8.9, 8.9$  Hz, 2H), 2.37 (s, 3H).  $^{13}\text{C}\{^1\text{H}\}$  NMR (100 MHz,  $\text{DMSO-}d_6$ )  $\delta$  164.3, 158.1, 157.8 (d,  $J = 238.6$  Hz), 140.6, 137.5 (d,  $J = 2.1$  Hz), 130.3, 128.0, 127.2, 119.6 (d,  $J = 7.8$  Hz), 116.1 (d,  $J = 22.4$  Hz), 21.4.  $^{19}\text{F}$  NMR (376 MHz,  $\text{DMSO-}d_6$ )  $\delta$  -121.10 – -121.15 (m, 1F). HRMS (ESI-TOF) Calcd for  $\text{C}_{15}\text{H}_{13}\text{FN}_3\text{S}^+$  ( $[\text{M}+\text{H}]^+$ ) 286.0809. Found 286.0812.

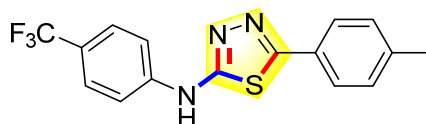

**3o**, 5-(*p*-tolyl)-*N*-(4-(trifluoromethyl)phenyl)-1,3,4-thiadiazol-2-amine, yellowish solid: mp 215–216 °C. <sup>1</sup>H NMR (400 MHz, DMSO-*d*<sub>6</sub>) δ 10.94 (s, 1H), 7.87 (d, *J* = 8.5 Hz, 2H), 7.77 (d, *J* = 8.0 Hz, 2H), 7.72 (d, *J* = 8.6 Hz, 2H), 7.33 (d, *J* = 7.9 Hz, 2H), 2.37 (s, 3H). <sup>13</sup>C{<sup>1</sup>H} NMR (100 MHz, DMSO-*d*<sub>6</sub>) δ 163.5, 159.3, 144.2, 140.9, 130.3, 127.8, 127.3, 126.9 (q, *J* = 3.7 Hz), 125.0 (q, *J* = 271.1 Hz), 122.1 (q, *J* = 31.8 Hz), 117.7, 21.4. <sup>19</sup>F NMR (376 MHz, DMSO-*d*<sub>6</sub>) δ -59.98 (s, 3F). HRMS (ESI-TOF) Calcd for C<sub>16</sub>H<sub>13</sub>F<sub>3</sub>N<sub>3</sub>S<sup>+</sup> ([M+H]<sup>+</sup>) 336.0777. Found 336.0792.

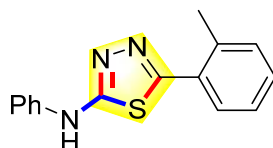

**3p**, *N*-phenyl-5-(*o*-tolyl)-1,3,4-thiadiazol-2-amine, pale yellow solid: mp 168–169 °C. <sup>1</sup>H NMR (400 MHz, DMSO-*d*<sub>6</sub>) δ 10.50 (s, 1H), 7.67 (d, *J* = 7.4 Hz, 2H), 7.62 (d, *J* = 7.1 Hz, 1H), 7.42 – 7.31 (m, 5H), 7.03 (dd, *J* = 7.4, 7.4 Hz, 1H), 2.53 (s, 3H). <sup>13</sup>C{<sup>1</sup>H} NMR (100 MHz, DMSO-*d*<sub>6</sub>) δ 164.9, 157.3, 141.0, 136.7, 131.9, 130.6, 130.1, 129.8, 129.6, 126.9, 122.5, 118.0, 21.7. HRMS (ESI-TOF) Calcd for C<sub>15</sub>H<sub>14</sub>N<sub>3</sub>S<sup>+</sup> ([M+H]<sup>+</sup>) 268.0903. Found 268.0907.

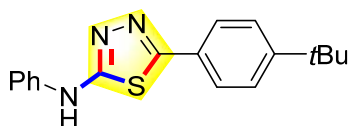

**3q**, 5-(4-(*tert*-butyl)phenyl)-*N*-phenyl-1,3,4-thiadiazol-2-amine,<sup>8</sup> white solid: mp 178–179 °C. <sup>1</sup>H NMR (400 MHz, DMSO-*d*<sub>6</sub>) δ 10.51 (s, 1H), 7.78 (d, *J* = 8.4 Hz, 2H), 7.66 (d, *J* = 7.4 Hz, 2H), 7.53 (d, *J* = 8.4 Hz, 2H), 7.37 (dd, *J* = 8.5, 7.3 Hz, 2H), 7.03 (dd, *J* = 7.3, 7.3 Hz, 1H), 1.31 (s, 9H). <sup>13</sup>C{<sup>1</sup>H} NMR (100 MHz, DMSO-*d*<sub>6</sub>) δ 164.3, 158.0, 153.5, 141.0, 129.6, 128.1, 127.0, 126.5, 122.5, 117.9, 35.1, 31.4. HRMS (ESI-TOF) Calcd for C<sub>18</sub>H<sub>20</sub>N<sub>3</sub>S<sup>+</sup> ([M+H]<sup>+</sup>) 310.1372. Found 310.1372.

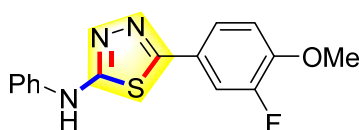

**3r**, 5-(3-fluoro-4-methoxyphenyl)-*N*-phenyl-1,3,4-thiadiazol-2-amine, white solid: mp

250–251 °C.  $^1\text{H}$  NMR (400 MHz, DMSO- $d_6$ )  $\delta$  10.52 (s, 1H), 7.73 (dd,  $J = 12.2, 2.2$  Hz, 1H), 7.66 – 7.62 (m, 3H), 7.39 – 7.35 (m, 2H), 7.30 (dd,  $J = 8.7, 8.7$  Hz, 1H), 7.03 (dd,  $J = 7.4, 7.4$  Hz, 1H), 3.91 (s, 3H).  $^{13}\text{C}\{^1\text{H}\}$  NMR (100 MHz, DMSO- $d_6$ )  $\delta$  164.4, 156.8 (d,  $J = 2.8$  Hz), 151.9 (d,  $J = 245.2$  Hz), 149.2 (d,  $J = 10.5$  Hz), 141.0, 129.6, 124.3 (d,  $J = 3.2$  Hz), 123.6 (d,  $J = 7.1$  Hz), 122.5, 118.0, 114.8 (d,  $J = 2.2$  Hz), 114.2 (d,  $J = 20.1$  Hz), 56.7.  $^{19}\text{F}$  NMR (376 MHz, DMSO- $d_6$ )  $\delta$  -134.26 – -134.32 (m, 1F). HRMS (ESI-TOF) Calcd for  $\text{C}_{15}\text{H}_{13}\text{FN}_3\text{OS}^+$  ( $[\text{M}+\text{H}]^+$ ) 302.0758. Found 302.0760.

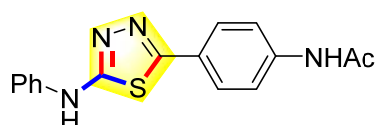

**3s**, *N*-(4-(5-(phenylamino)-1,3,4-thiadiazol-2-yl)phenyl)acetamide, white solid: mp 227–228 °C.  $^1\text{H}$  NMR (400 MHz, DMSO- $d_6$ )  $\delta$  10.51 (s, 1H), 10.23 (s, 1H), 7.80 (d,  $J = 8.7$  Hz, 2H), 7.73 (d,  $J = 8.8$  Hz, 2H), 7.66 (d,  $J = 7.3$  Hz, 2H), 7.37 (dd,  $J = 8.6, 7.3$  Hz, 2H), 7.02 (dddd,  $J = 7.4, 7.4, 1.1, 1.1$  Hz, 1H), 2.09 (s, 3H).  $^{13}\text{C}\{^1\text{H}\}$  NMR (100 MHz, DMSO- $d_6$ )  $\delta$  169.1, 164.0, 157.9, 141.5, 141.1, 129.6, 127.9, 125.3, 122.4, 119.6, 117.9, 24.6. HRMS (ESI-TOF) Calcd for  $\text{C}_{16}\text{H}_{15}\text{N}_4\text{OS}^+$  ( $[\text{M}+\text{H}]^+$ ) 311.0961. Found 311.0957.

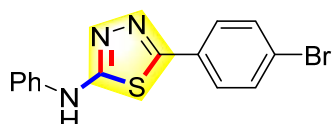

**3t**, 5-(4-bromophenyl)-*N*-phenyl-1,3,4-thiadiazol-2-amine,<sup>9</sup> yellowish solid: mp 210–211 °C.  $^1\text{H}$  NMR (400 MHz, DMSO- $d_6$ )  $\delta$  10.61 (s, 1H), 7.82 (d,  $J = 8.6$  Hz, 2H), 7.72 (d,  $J = 8.6$  Hz, 2H), 7.65 (d,  $J = 7.8$  Hz, 2H), 7.38 (dd,  $J = 8.6, 7.3$  Hz, 2H), 7.04 (dd,  $J = 7.4, 7.4$  Hz, 1H).  $^{13}\text{C}\{^1\text{H}\}$  NMR (100 MHz, DMSO- $d_6$ )  $\delta$  164.8, 156.9, 140.8, 132.7, 129.9, 129.6, 129.0, 123.9, 122.7, 118.0. HRMS (ESI-TOF) Calcd for  $\text{C}_{14}\text{H}_{11}\text{BrN}_3\text{S}^+$  ( $[\text{M}+\text{H}]^+$ ) 331.9852. Found 331.9853.

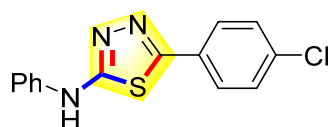

**3u**, 5-(4-chlorophenyl)-*N*-phenyl-1,3,4-thiadiazol-2-amine,<sup>8</sup> yellowish solid: mp 228–229 °C.  $^1\text{H}$  NMR (400 MHz, DMSO- $d_6$ )  $\delta$  10.59 (s, 1H), 7.88 (d,  $J = 8.6$  Hz, 2H),

7.66 (d,  $J = 7.4$  Hz, 2H), 7.58 (d,  $J = 8.6$  Hz, 2H), 7.37 (dd,  $J = 8.5, 7.2$  Hz, 2H), 7.04 (dd,  $J = 7.3, 7.3$  Hz, 1H).  $^{13}\text{C}\{^1\text{H}\}$  NMR (100 MHz, DMSO- $d_6$ )  $\delta$  164.9, 156.8, 140.9, 135.1, 129.8, 129.64, 129.62, 128.8, 122.7, 118.0. HRMS (ESI-TOF) Calcd for  $\text{C}_{14}\text{H}_{11}\text{ClN}_3\text{S}^+$  ( $[\text{M}+\text{H}]^+$ ) 288.0357. Found 288.0358.

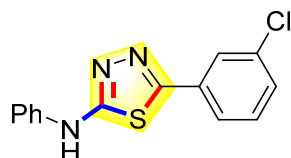

**3v**, 5-(3-chlorophenyl)-*N*-phenyl-1,3,4-thiadiazol-2-amine, pale yellow solid: mp 182–183 °C.  $^1\text{H}$  NMR (400 MHz, DMSO- $d_6$ )  $\delta$  10.63 (s, 1H), 7.92 – 7.90 (m, 1H), 7.85 – 7.79 (m, 1H), 7.66 (d,  $J = 7.5$  Hz, 2H), 7.59 – 7.52 (m, 2H), 7.38 (dd,  $J = 8.6, 7.3$  Hz, 2H), 7.04 (dd,  $J = 7.4, 7.4$  Hz, 1H).  $^{13}\text{C}\{^1\text{H}\}$  NMR (100 MHz, DMSO- $d_6$ )  $\delta$  165.1, 156.5, 140.8, 134.4, 132.7, 131.7, 130.4, 129.7, 126.4, 126.0, 122.7, 118.1. HRMS (ESI-TOF) Calcd for  $\text{C}_{14}\text{H}_{11}\text{ClN}_3\text{S}^+$  ( $[\text{M}+\text{H}]^+$ ) 288.0357. Found 288.0365.

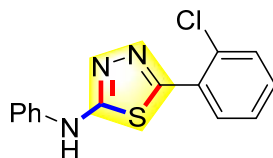

**3w**, 5-(2-chlorophenyl)-*N*-phenyl-1,3,4-thiadiazol-2-amine, pale yellow solid: mp 218–219 °C.  $^1\text{H}$  NMR (400 MHz, DMSO- $d_6$ )  $\delta$  10.58 (s, 1H), 8.11 – 8.07 (m, 1H), 7.68 – 7.66 (m, 3H), 7.57 – 7.50 (m, 2H), 7.38 (dd,  $J = 8.6, 7.3$  Hz, 2H), 7.04 (dddd,  $J = 7.3, 7.3, 1.1, 1.1$  Hz, 1H).  $^{13}\text{C}\{^1\text{H}\}$  NMR (100 MHz, DMSO- $d_6$ )  $\delta$  166.2, 153.3, 140.9, 132.0, 131.3, 131.0, 129.7, 129.4, 128.3, 122.7, 118.1. HRMS (ESI-TOF) Calcd for  $\text{C}_{14}\text{H}_{11}\text{ClN}_3\text{S}^+$  ( $[\text{M}+\text{H}]^+$ ) 288.0357. Found 288.0355.

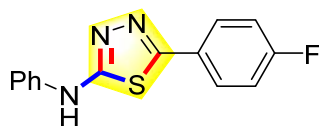

**3x**, 5-(4-fluorophenyl)-*N*-phenyl-1,3,4-thiadiazol-2-amine,<sup>11</sup> white solid: mp 214–215 °C.  $^1\text{H}$  NMR (400 MHz, DMSO- $d_6$ )  $\delta$  10.55 (s, 1H), 7.95 – 7.90 (m, 2H), 7.66 (d,  $J = 7.3$  Hz, 2H), 7.40 – 7.34 (m, 4H), 7.03 (dddd,  $J = 7.4, 7.4, 1.1, 1.1$  Hz, 1H).  $^{13}\text{C}\{^1\text{H}\}$  NMR (100 MHz, DMSO- $d_6$ )  $\delta$  164.6, 163.5 (d,  $J = 248.1$  Hz), 156.9, 140.9, 129.6, 129.5 (d,  $J = 8.8$  Hz), 127.4 (d,  $J = 3.1$  Hz), 122.6, 118.0, 116.8 (d,  $J = 22.1$  Hz).  $^{19}\text{F}$  NMR (376 MHz, DMSO- $d_6$ )  $\delta$  -110.43 – -110.51 (m, 1F). HRMS (ESI-TOF) Calcd for  $\text{C}_{14}\text{H}_{11}\text{FN}_3\text{S}^+$  ( $[\text{M}+\text{H}]^+$ ) 272.0652. Found 272.0651.

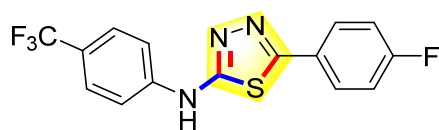

**3y**, 5-(4-fluorophenyl)-*N*-(4-(trifluoromethyl)phenyl)-1,3,4-thiadiazol-2-amine, white solid: mp 268–269 °C.  $^1\text{H}$  NMR (400 MHz,  $\text{DMSO-}d_6$ )  $\delta$  10.95 (s, 1H), 7.93 (dd,  $J = 8.5, 5.3$  Hz, 2H), 7.85 (d,  $J = 8.4$  Hz, 2H), 7.71 (d,  $J = 8.4$  Hz, 2H), 7.36 (dd,  $J = 8.6, 8.6$  Hz, 2H).  $^{13}\text{C}\{^1\text{H}\}$  NMR (100 MHz,  $\text{DMSO-}d_6$ )  $\delta$  164.0, 163.7 (d,  $J = 248.4$  Hz), 158.1, 144.1, 129.6 (d,  $J = 8.7$  Hz), 127.1 (d,  $J = 3.2$  Hz), 126.9 (q,  $J = 3.9$  Hz), 125.0 (q,  $J = 271.1$  Hz), 122.3 (q,  $J = 32.1$  Hz), 117.7, 116.8 (d,  $J = 22.1$  Hz).  $^{19}\text{F}$  NMR (376 MHz,  $\text{DMSO-}d_6$ )  $\delta$  -60.04 (s, 3F), -110.02 – -110.08 (m, 1F). HRMS (ESI-TOF) Calcd for  $\text{C}_{15}\text{H}_{10}\text{F}_4\text{N}_3\text{S}^+$  ( $[\text{M}+\text{H}]^+$ ) 340.0526. Found 340.0529.

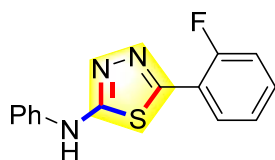

**3z**, 5-(2-fluorophenyl)-*N*-phenyl-1,3,4-thiadiazol-2-amine,<sup>8</sup> white solid: mp 206–207 °C.  $^1\text{H}$  NMR (400 MHz,  $\text{DMSO-}d_6$ )  $\delta$  10.58 (s, 1H), 8.18 (ddd,  $J = 7.7, 7.7, 1.8$  Hz, 1H), 7.67 (d,  $J = 7.5$  Hz, 2H), 7.58 (dddd,  $J = 8.6, 7.2, 5.5, 1.8$  Hz, 1H), 7.47 – 7.37 (m, 4H), 7.04 (dddd,  $J = 7.3, 7.3, 1.1, 1.1$  Hz, 1H).  $^{13}\text{C}\{^1\text{H}\}$  NMR (100 MHz,  $\text{DMSO-}d_6$ )  $\delta$  166.0 (d,  $J = 4.7$  Hz), 158.6 (d,  $J = 249.0$  Hz), 150.2 (d,  $J = 7.8$  Hz), 140.9, 132.6 (d,  $J = 8.6$  Hz), 129.6, 128.4 (d,  $J = 2.4$  Hz), 125.8 (d,  $J = 3.2$  Hz), 122.7, 118.6 (d,  $J = 12.0$  Hz), 118.1, 116.9 (d,  $J = 21.7$  Hz).  $^{19}\text{F}$  NMR (376 MHz,  $\text{DMSO-}d_6$ )  $\delta$  -113.09 – -113.16 (m, 1F). HRMS (ESI-TOF) Calcd for  $\text{C}_{14}\text{H}_{11}\text{FN}_3\text{S}^+$  ( $[\text{M}+\text{H}]^+$ ) 272.0652. Found 272.0652.

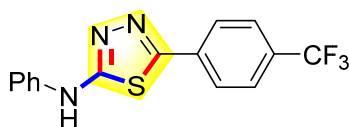

**3aa**, *N*-phenyl-5-(4-(trifluoromethyl)phenyl)-1,3,4-thiadiazol-2-amine, white solid: mp 232–233 °C.  $^1\text{H}$  NMR (400 MHz,  $\text{DMSO-}d_6$ )  $\delta$  10.68 (s, 1H), 8.08 (d,  $J = 8.0$  Hz, 2H), 7.87 (d,  $J = 8.0$  Hz, 2H), 7.67 (d,  $J = 8.0$  Hz, 2H), 7.39 (dd,  $J = 7.8, 7.8$  Hz, 2H), 7.05 (dd,  $J = 7.4, 7.4$  Hz, 1H).  $^{13}\text{C}\{^1\text{H}\}$  NMR (100 MHz,  $\text{DMSO-}d_6$ )  $\delta$  165.4, 156.4, 140.8, 134.5 (d,  $J = 1.0$  Hz), 130.3 (q,  $J = 32.1$  Hz), 129.7, 127.8, 126.7 (q,  $J = 3.8$  Hz), 124.4 (d,  $J = 272.3$  Hz), 122.9, 118.2.  $^{19}\text{F}$  NMR (376 MHz,  $\text{DMSO-}d_6$ )  $\delta$  -61.29

(s, 3F). HRMS (ESI-TOF) Calcd for  $C_{15}H_{11}F_3N_3S^+$  ( $[M+H]^+$ ) 322.0620. Found 322.0627.

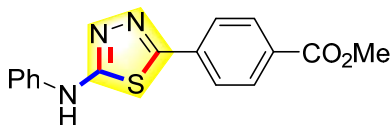

**3ab**, methyl 4-(5-(phenylamino)-1,3,4-thiadiazol-2-yl)benzoate, yellow solid: mp 214–215 °C.  $^1H$  NMR (400 MHz, DMSO- $d_6$ )  $\delta$  10.68 (s, 1H), 8.08 (d,  $J$  = 8.5 Hz, 2H), 8.01 (d,  $J$  = 8.5 Hz, 2H), 7.67 (d,  $J$  = 7.3 Hz, 2H), 7.39 (dd,  $J$  = 8.6, 7.3 Hz, 2H), 7.05 (dddd,  $J$  = 7.3, 7.3, 1.1, 1.1 Hz, 1H), 3.89 (s, 3H).  $^{13}C\{^1H\}$  NMR (100 MHz, DMSO- $d_6$ )  $\delta$  166.1, 165.3, 156.8, 140.8, 134.9, 131.0, 130.5, 129.7, 127.4, 122.8, 118.2, 52.8. HRMS (ESI-TOF) Calcd for  $C_{16}H_{14}N_3O_2S^+$  ( $[M+H]^+$ ) 312.0801. Found 312.0800.

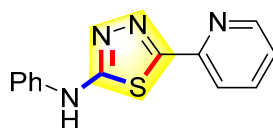

**3ac**, *N*-phenyl-5-(pyridin-2-yl)-1,3,4-thiadiazol-2-amine,<sup>12</sup> pale yellow solid: mp 219–220 °C.  $^1H$  NMR (400 MHz, DMSO- $d_6$ )  $\delta$  10.64 (s, 1H), 8.64 (ddd,  $J$  = 4.9, 1.4, 1.4 Hz, 1H), 8.15 (ddd,  $J$  = 8.0, 1.1, 1.1 Hz, 1H), 7.98 (ddd,  $J$  = 7.7, 7.7, 1.7 Hz, 1H), 7.67 (d,  $J$  = 7.4 Hz, 2H), 7.49 (ddd,  $J$  = 7.5, 4.9, 1.2 Hz, 1H), 7.38 (dd,  $J$  = 8.5, 7.3 Hz, 2H), 7.04 (dd,  $J$  = 7.4, 7.4 Hz, 1H).  $^{13}C\{^1H\}$  NMR (100 MHz, DMSO- $d_6$ )  $\delta$  166.0, 160.1, 150.3, 149.5, 140.8, 138.1, 129.6, 125.4, 122.7, 119.9, 118.1. HRMS (ESI-TOF) Calcd for  $C_{13}H_{11}N_4S^+$  ( $[M+H]^+$ ) 255.0699. Found 255.0692.

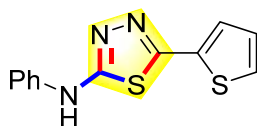

**3ad**, *N*-phenyl-5-(thiophen-2-yl)-1,3,4-thiadiazol-2-amine,<sup>13</sup> pale yellow solid: mp 175–176 °C.  $^1H$  NMR (400 MHz, DMSO- $d_6$ )  $\delta$  10.53 (s, 1H), 7.67 (dd,  $J$  = 5.1, 1.2 Hz, 1H), 7.60 – 7.57 (m, 2H), 7.53 (dd,  $J$  = 3.7, 1.2 Hz, 1H), 7.36 (dd,  $J$  = 8.6, 7.3 Hz, 2H), 7.17 (dd,  $J$  = 5.1, 3.7 Hz, 1H), 7.03 (ddd,  $J$  = 7.4, 7.4, 1.2, 1.2 Hz, 1H).  $^{13}C\{^1H\}$

<sup>12</sup> A. Bharti, P. Bharati, N. K. Singh and M. K. Bharty, *J. Coord. Chem.*, 2016, **69**, 1258–1271.

<sup>13</sup> H. Muğlu, H. Yakan, H. A. Shouaib, *J. Mol. Struct.*, 2020, **1203**, 127470.



NMR (100 MHz, DMSO-*d*<sub>6</sub>)  $\delta$  164.2, 152.5, 140.7, 132.6, 129.7, 129.3, 129.1, 128.8, 122.9, 118.1. HRMS (ESI-TOF) Calcd for C<sub>12</sub>H<sub>10</sub>N<sub>3</sub>S<sub>2</sub><sup>+</sup> ([M+H]<sup>+</sup>) 260.0311. Found 260.0313.

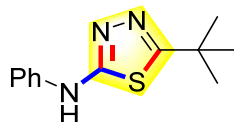

**3ae**, 5-(*tert*-butyl)-*N*-phenyl-1,3,4-thiadiazol-2-amine, pale yellow solid: mp 194–195 °C. <sup>1</sup>H NMR (400 MHz, DMSO-*d*<sub>6</sub>)  $\delta$  10.23 (s, 1H), 7.54 (d, *J* = 7.5 Hz, 2H), 7.31 (dd, *J* = 8.6, 7.3 Hz, 2H), 6.97 (dd, *J* = 8.1, 6.8 Hz, 1H), 1.34 (s, 9H). <sup>13</sup>C{<sup>1</sup>H} NMR (100 MHz, DMSO-*d*<sub>6</sub>)  $\delta$  170.1, 164.6, 141.2, 129.5, 122.3, 117.8, 36.0, 30.9. HRMS (ESI-TOF) Calcd for C<sub>12</sub>H<sub>16</sub>N<sub>3</sub>S<sup>+</sup> ([M+H]<sup>+</sup>) 234.1059. Found 234.1055.

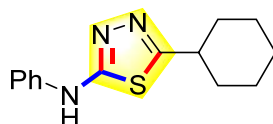

**3af**, 5-cyclohexyl-*N*-phenyl-1,3,4-thiadiazol-2-amine, white solid: mp 188–189 °C. <sup>1</sup>H NMR (400 MHz, DMSO-*d*<sub>6</sub>)  $\delta$  10.22 (s, 1H), 7.55 (d, *J* = 7.4 Hz, 2H), 7.31 (dd, *J* = 8.5, 7.3 Hz, 2H), 6.97 (dd, *J* = 7.3, 7.3 Hz, 1H), 2.94 (tt, *J* = 11.1, 3.6 Hz, 1H), 1.97 (dd, *J* = 10.5, 4.8 Hz, 2H), 1.73 (dt, *J* = 12.5, 3.3 Hz, 2H), 1.66 – 1.61 (m, 1H), 1.48 – 1.29 (m, 4H), 1.22 (ddt, *J* = 15.5, 12.1, 6.0 Hz, 1H). <sup>13</sup>C{<sup>1</sup>H} NMR (100 MHz, DMSO-*d*<sub>6</sub>)  $\delta$  165.9, 164.1, 141.1, 129.6, 122.3, 117.7, 39.3, 33.4, 25.71, 25.66. HRMS (ESI-TOF) Calcd for C<sub>14</sub>H<sub>18</sub>N<sub>3</sub>S<sup>+</sup> ([M+H]<sup>+</sup>) 260.1216. Found 260.1214.

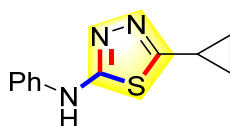

**3ag**, 5-cyclopropyl-*N*-phenyl-1,3,4-thiadiazol-2-amine, white solid: mp 153–154 °C. <sup>1</sup>H NMR (400 MHz, DMSO-*d*<sub>6</sub>)  $\delta$  10.18 (s, 1H), 7.52 (d, *J* = 7.5 Hz, 2H), 7.31 (dd, *J* = 8.5, 7.2 Hz, 2H), 6.97 (dd, *J* = 7.3, 7.3 Hz, 1H), 2.27 (tt, *J* = 8.3, 4.9 Hz, 1H), 1.15 – 1.03 (m, 2H), 0.94 – 0.83 (m, 2H). <sup>13</sup>C{<sup>1</sup>H} NMR (100 MHz, DMSO-*d*<sub>6</sub>)  $\delta$  163.5, 163.3, 141.1, 129.6, 122.3, 117.6, 11.3, 10.2. HRMS (ESI-TOF) Calcd for C<sub>11</sub>H<sub>12</sub>N<sub>3</sub>S<sup>+</sup> ([M+H]<sup>+</sup>) 218.0746. Found 218.0747.

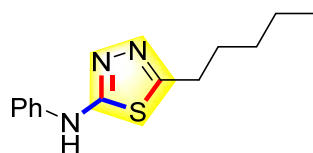

**3ah**, 5-pentyl-*N*-phenyl-1,3,4-thiadiazol-2-amine,<sup>14</sup> white solid: mp 157–158 °C. <sup>1</sup>H NMR (400 MHz, DMSO-*d*<sub>6</sub>) δ 10.23 (s, 1H), 7.57 – 7.53 (m, 2H), 7.32 (ddd, *J* = 8.6, 7.3, 2.0 Hz, 2H), 6.98 (ddd, *J* = 7.3, 7.3, 1.2 Hz, 1H), 2.87 (t, *J* = 7.5 Hz, 2H), 1.64 (p, *J* = 7.3 Hz, 2H), 1.28 (h, *J* = 3.7 Hz, 4H), 0.86 – 0.82 (m, 3H). <sup>13</sup>C{<sup>1</sup>H} NMR (100 MHz, DMSO-*d*<sub>6</sub>) δ 164.6, 160.8, 141.1, 129.6, 122.3, 117.7, 30.9, 29.6, 29.2, 22.1, 14.2. HRMS (ESI-TOF) Calcd for C<sub>13</sub>H<sub>18</sub>N<sub>3</sub>S<sup>+</sup> ([M+H]<sup>+</sup>) 248.1216. Found 248.1222.

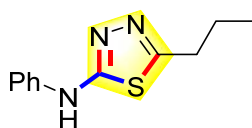

**3ai**, *N*-phenyl-5-propyl-1,3,4-thiadiazol-2-amine, white solid: mp 186–187 °C. <sup>1</sup>H NMR (400 MHz, DMSO-*d*<sub>6</sub>) δ 10.23 (s, 1H), 7.59 (d, *J* = 7.4 Hz, 2H), 7.33 (dd, *J* = 8.6, 7.3 Hz, 2H), 6.98 (dddd, *J* = 7.3, 7.3, 1.2, 1.2 Hz, 1H), 2.88 (t, *J* = 7.4 Hz, 2H), 1.69 (h, *J* = 7.4 Hz, 2H), 0.95 (t, *J* = 7.4 Hz, 3H). <sup>13</sup>C{<sup>1</sup>H} NMR (100 MHz, DMSO-*d*<sub>6</sub>) δ 164.4, 160.1, 141.3, 129.5, 122.0, 117.6, 31.6, 23.0, 13.8. HRMS (ESI-TOF) Calcd for C<sub>11</sub>H<sub>14</sub>N<sub>3</sub>S<sup>+</sup> ([M+H]<sup>+</sup>) 220.0903. Found 220.0906.

<sup>14</sup> E. N. W. Howe, N. Busschaert, X. Wu, S. N. Berry, J. Ho, M. E. Light, D. D. Czech, H. A. Klein, J. A. Kitchen and P. A. Gale, *J. Am. Chem. Soc.*, 2016, **138**, 8301–8308.

## VI. Copies of $^1\text{H}$ , $^{19}\text{F}$ , $^{13}\text{C}$ and DEPT NMR spectra

### 3a, $^1\text{H}$ NMR (in $\text{DMSO-}d_6$ )

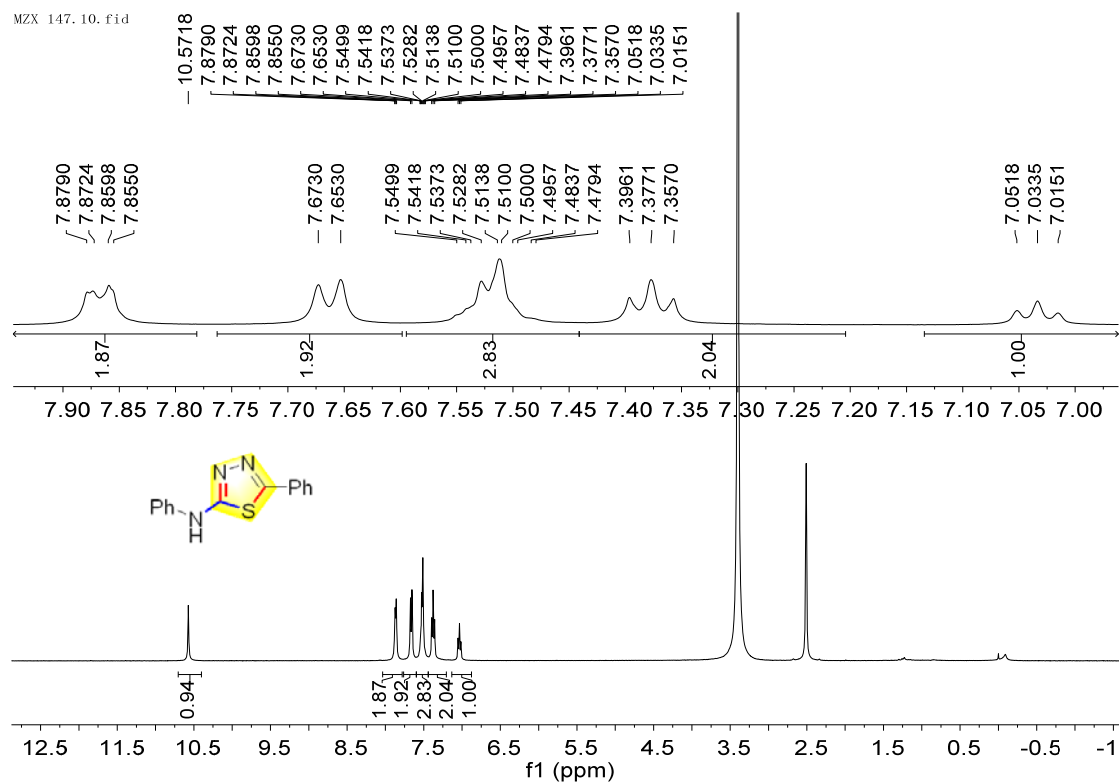

### $^{13}\text{C}$ NMR (in $\text{DMSO-}d_6$ )

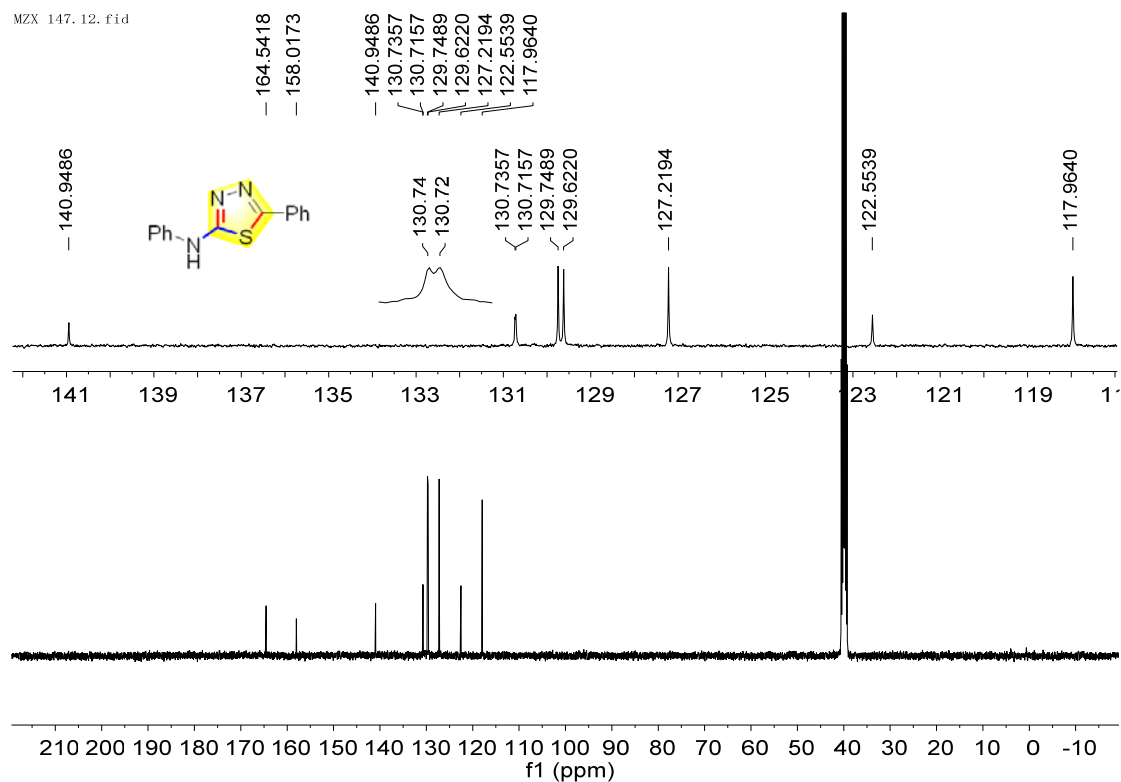

DEPT 90 and DEPT 135 (in DMSO-*d*<sub>6</sub>)

MZX 147.13.fid  
90

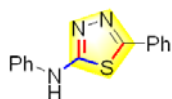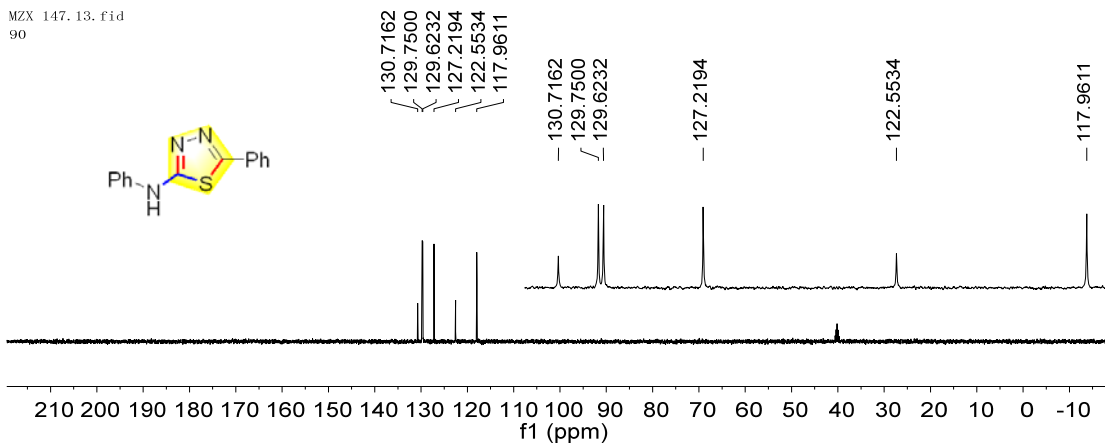

MZX 147.14.fid  
135

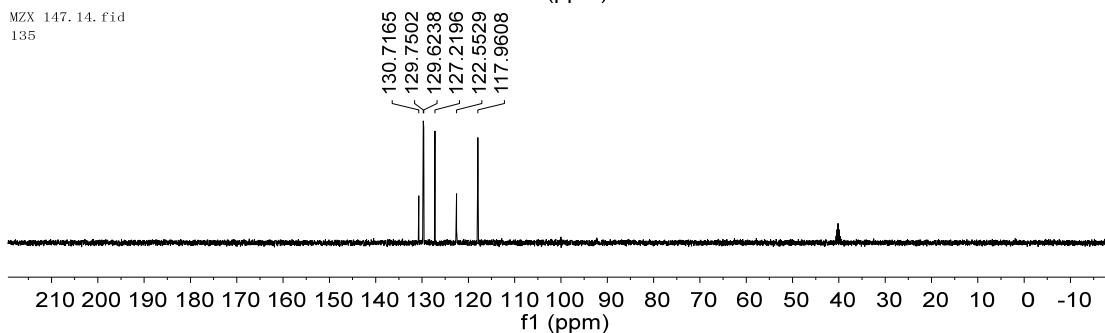

<sup>1</sup>H NMR (in CDCl<sub>3</sub>)

MZX a1 model.10.fid

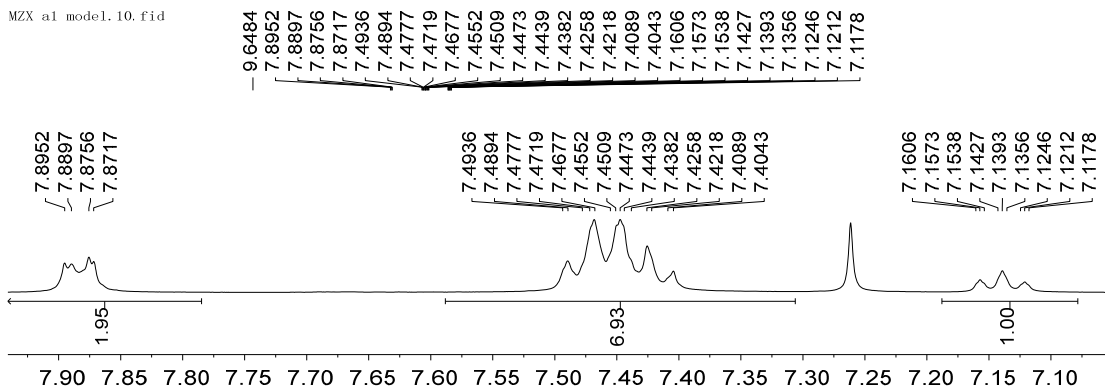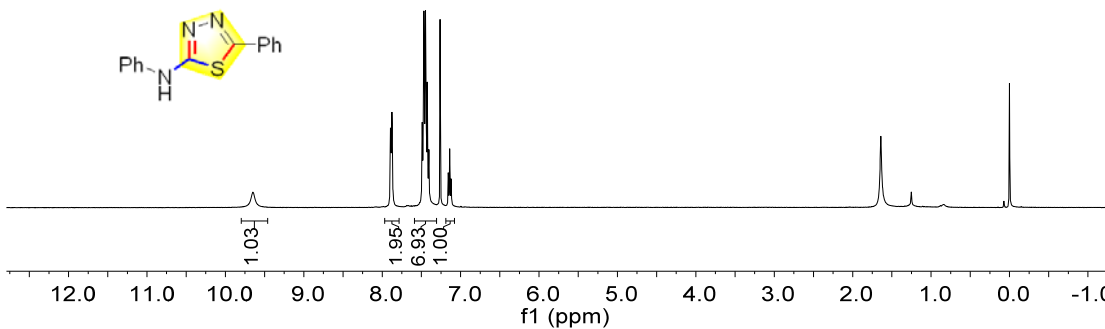

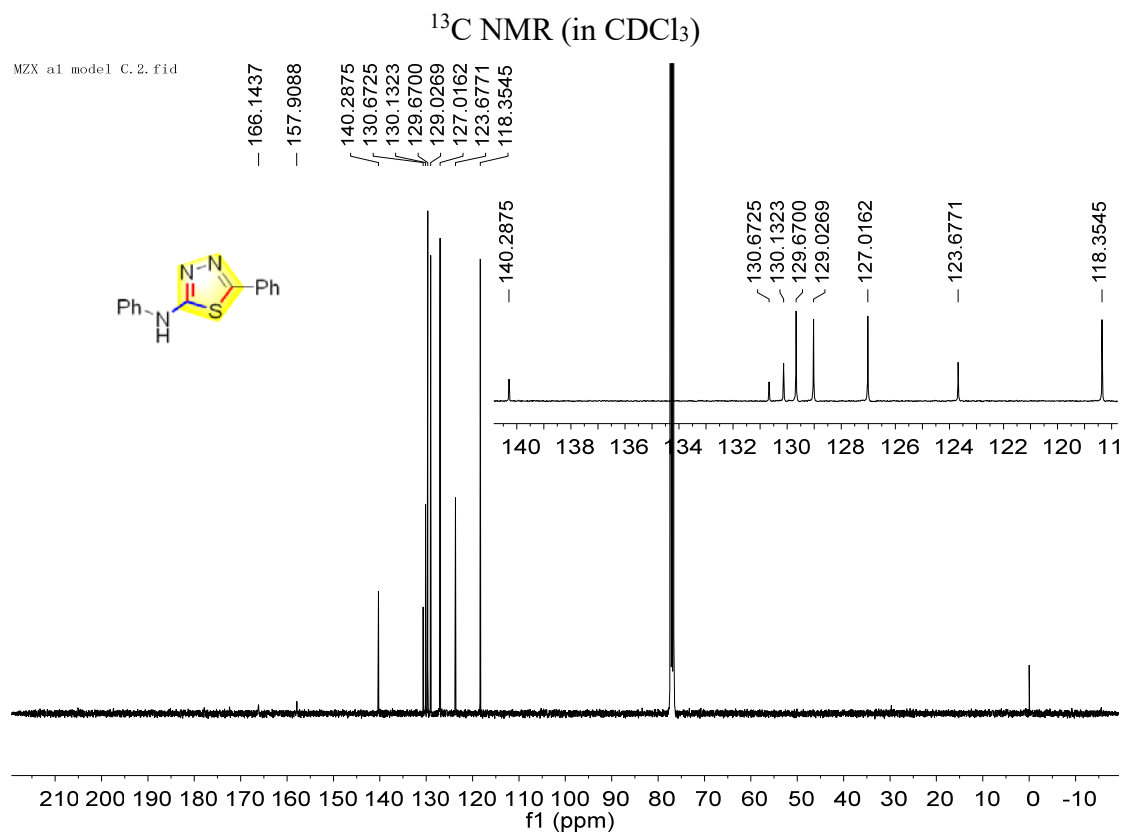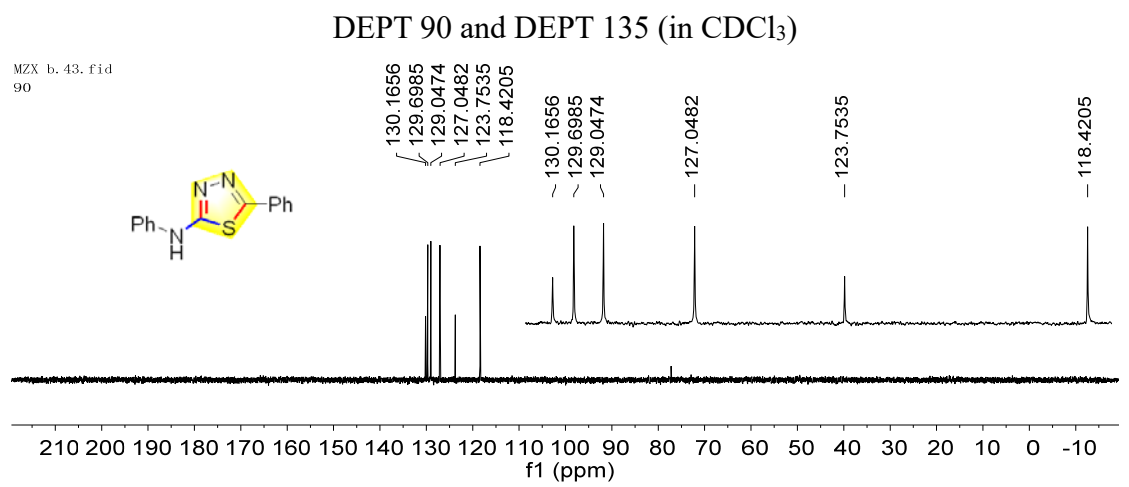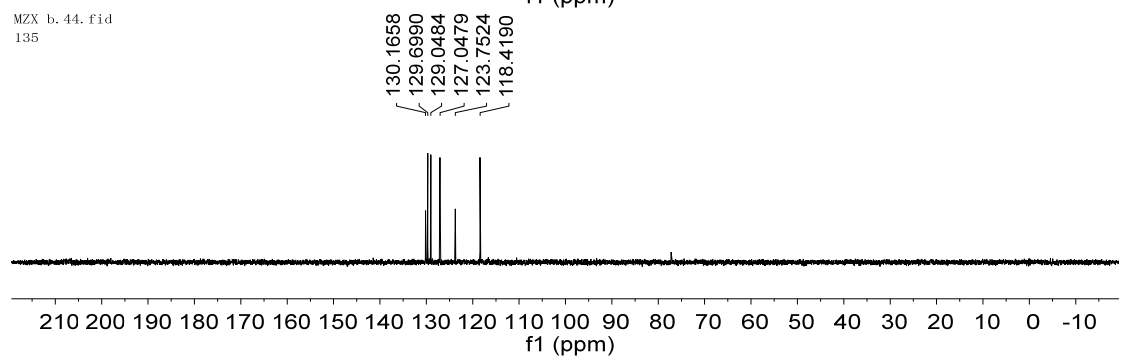

### 3b, <sup>1</sup>H NMR

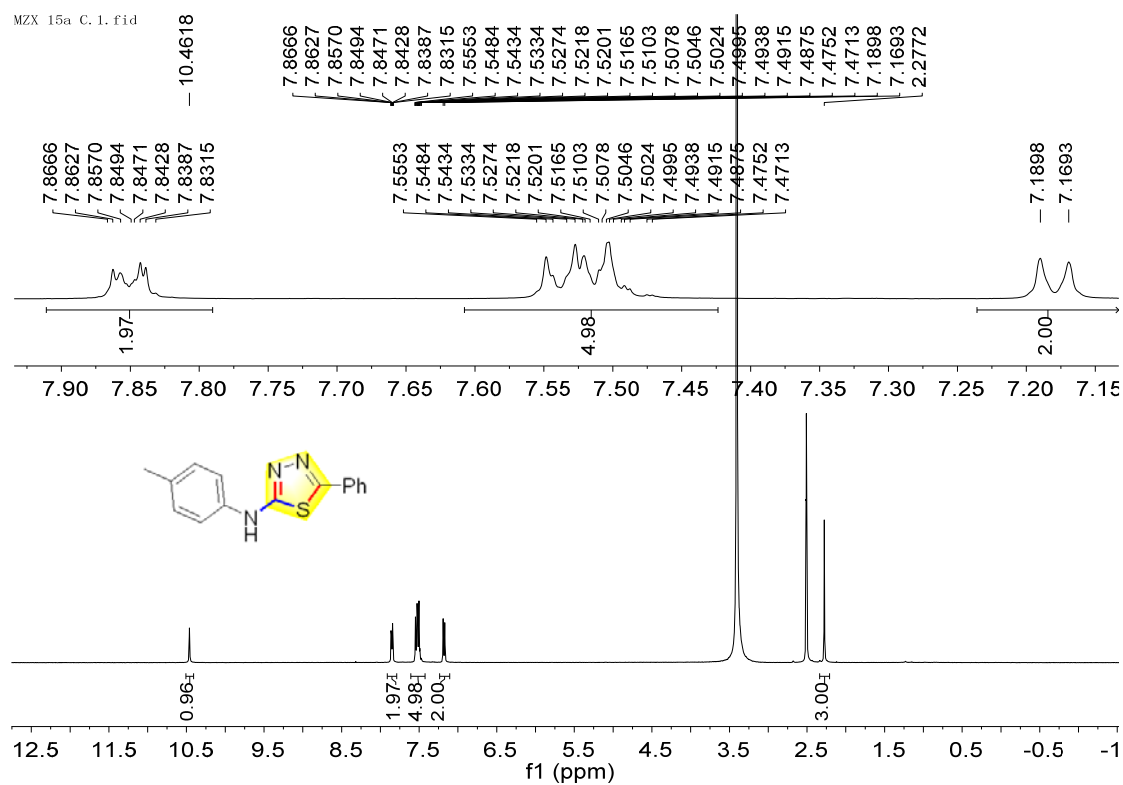

### <sup>13</sup>C NMR

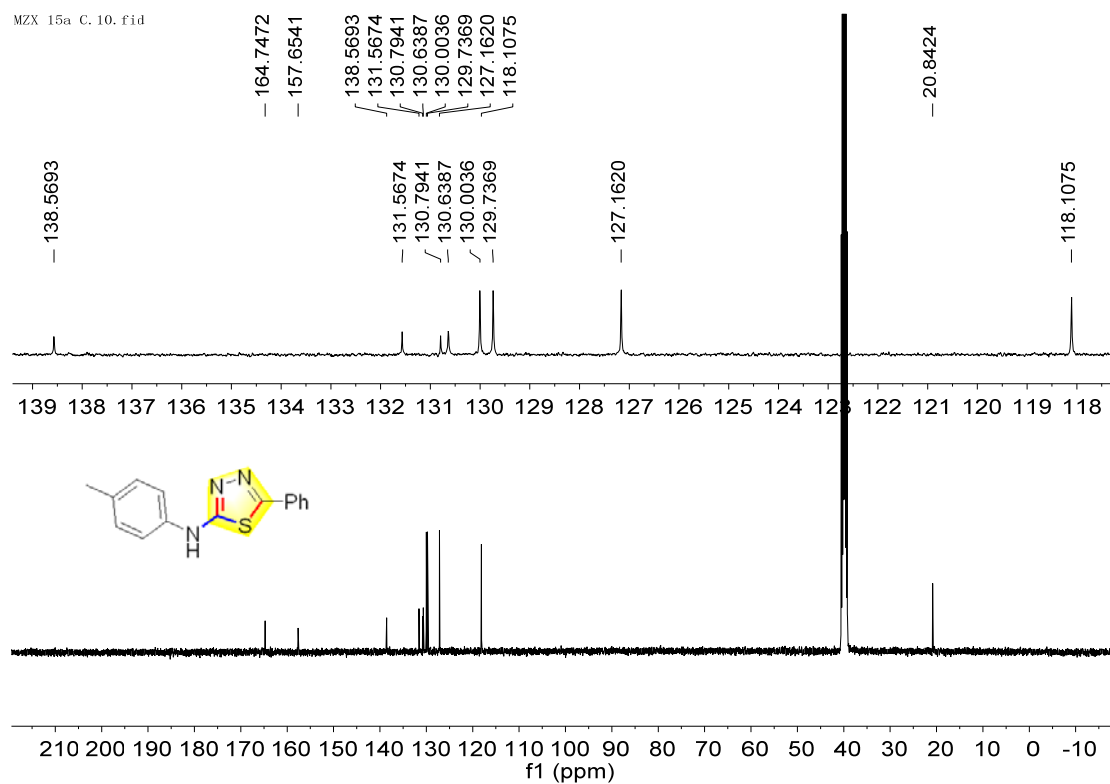

# DEPT 90 and DEPT 135

MZX 15a C. 11. fid  
90

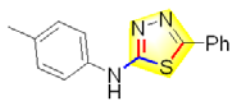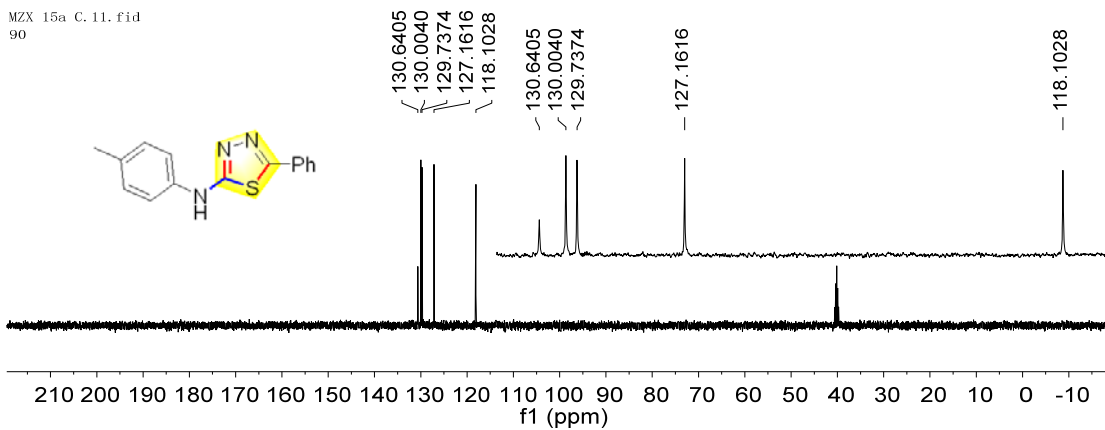

MZX 15a C. 12. fid  
135

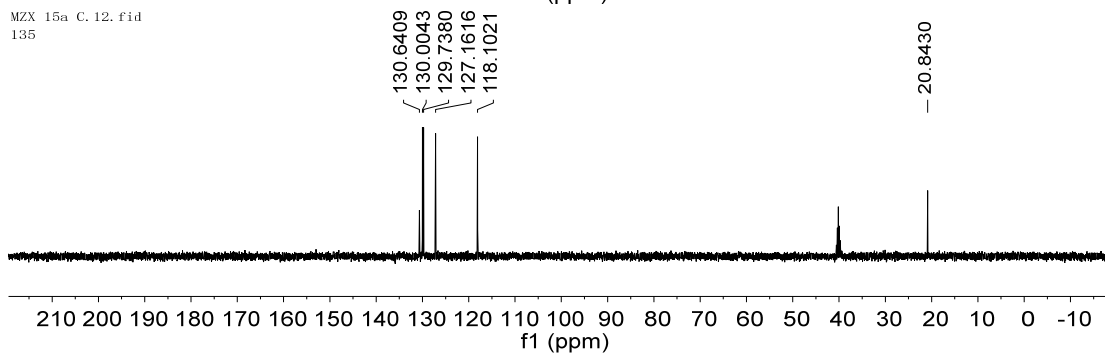

### 3c, <sup>1</sup>H NMR

MZX 126. 20. fid

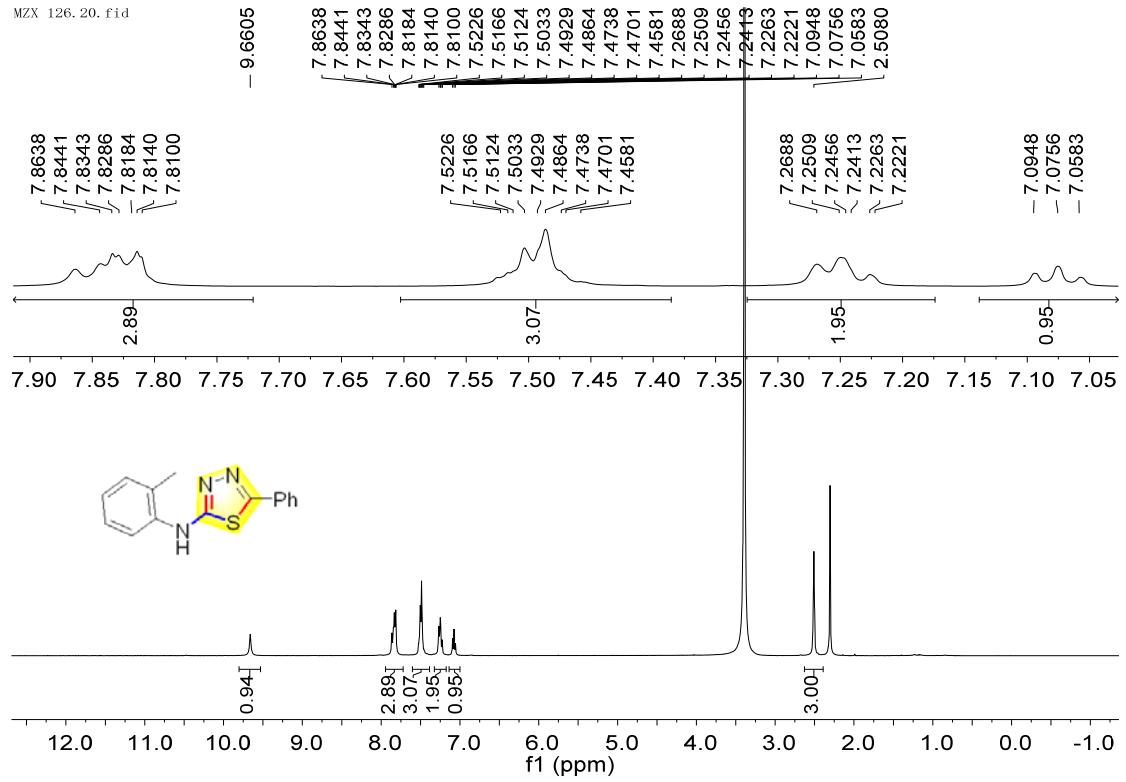

### <sup>13</sup>C NMR

MZX 126 C (2). 10. fid

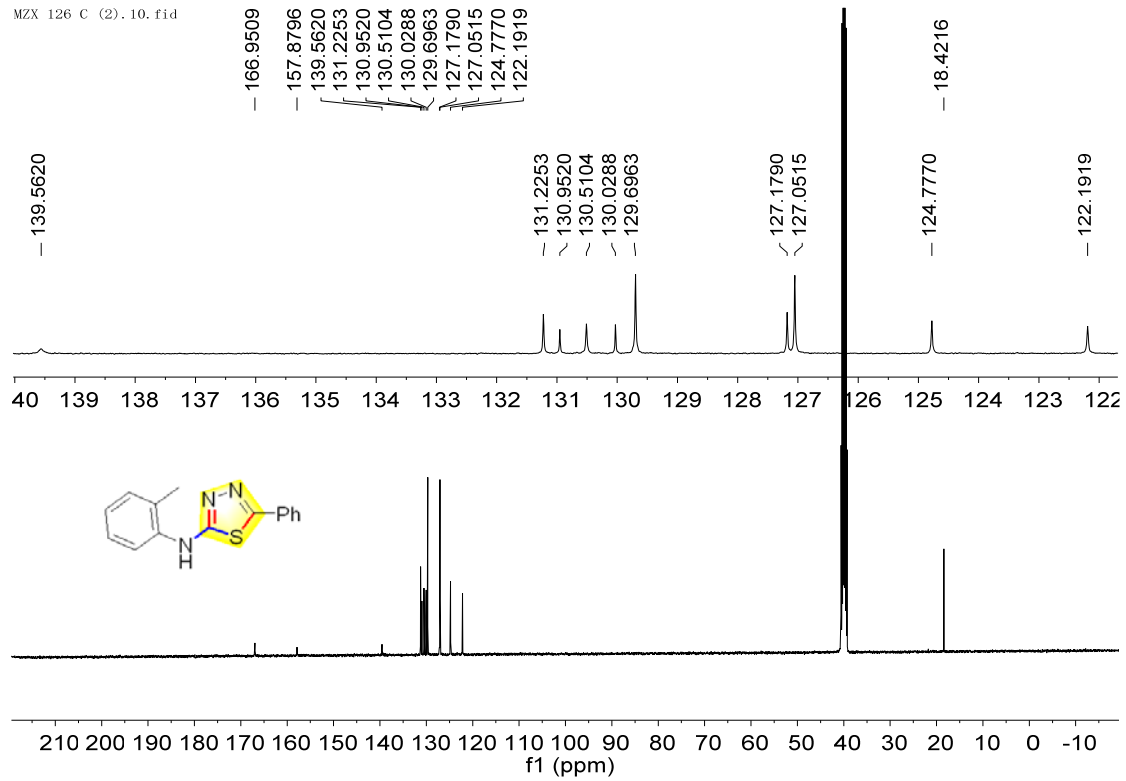



# DEPT 90 and DEPT 135

MZX 126 C. 3. fid  
90

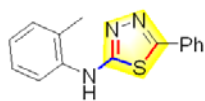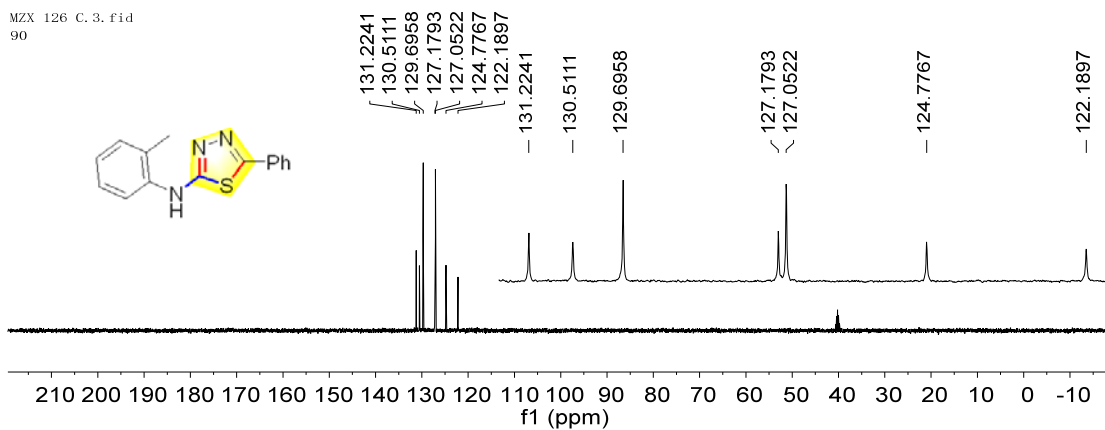

MZX 126 C. 4. fid  
135

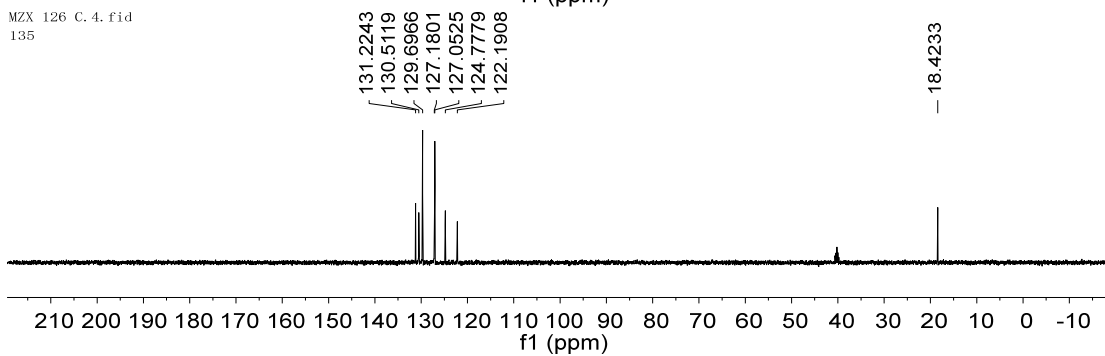

### 3d, <sup>1</sup>H NMR

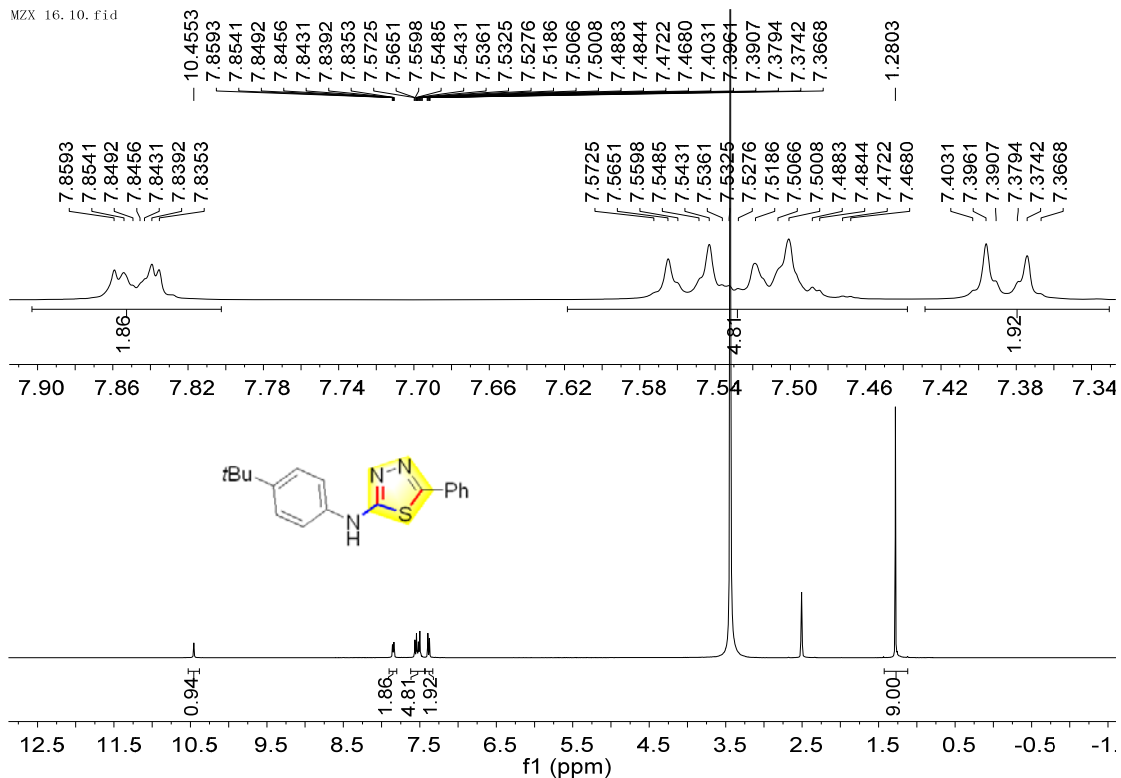

### <sup>13</sup>C NMR

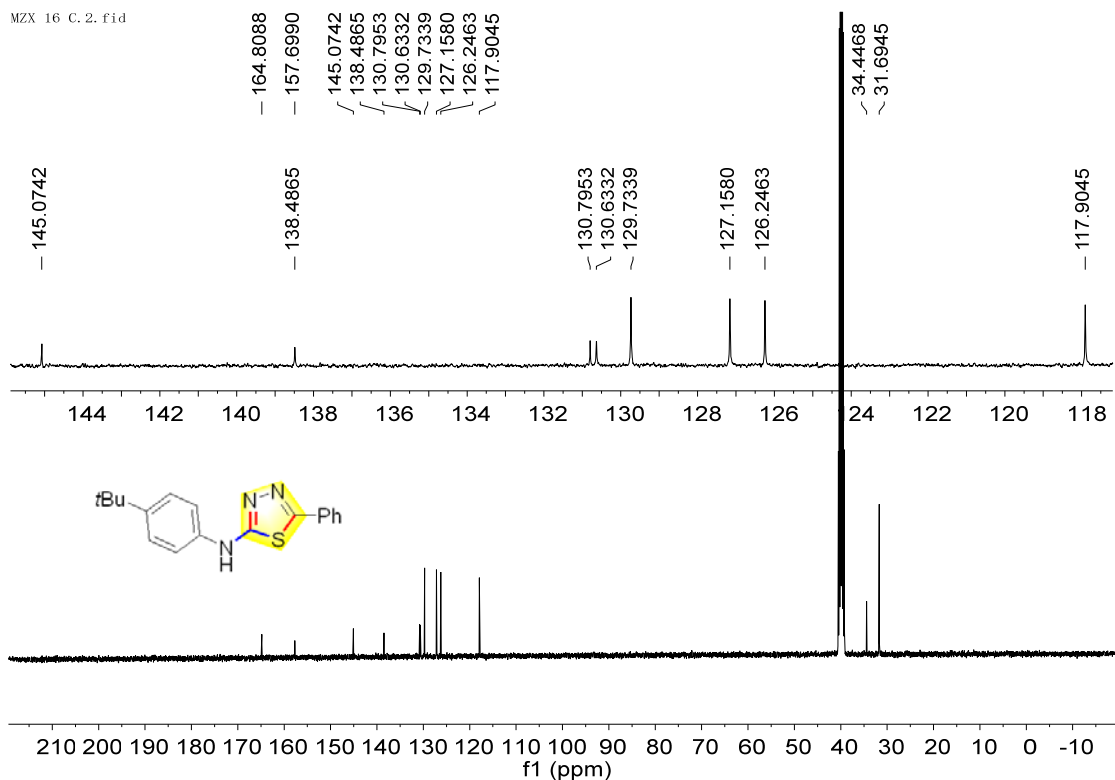

# DEPT 90 and DEPT 135

MZX 16 C. 3. fid  
90

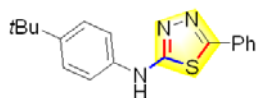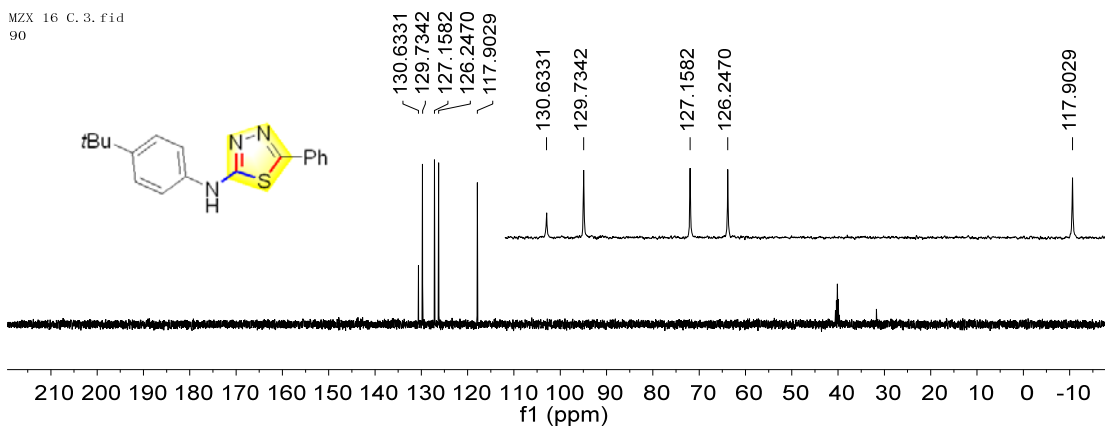

MZX 16 C. 4. fid  
135

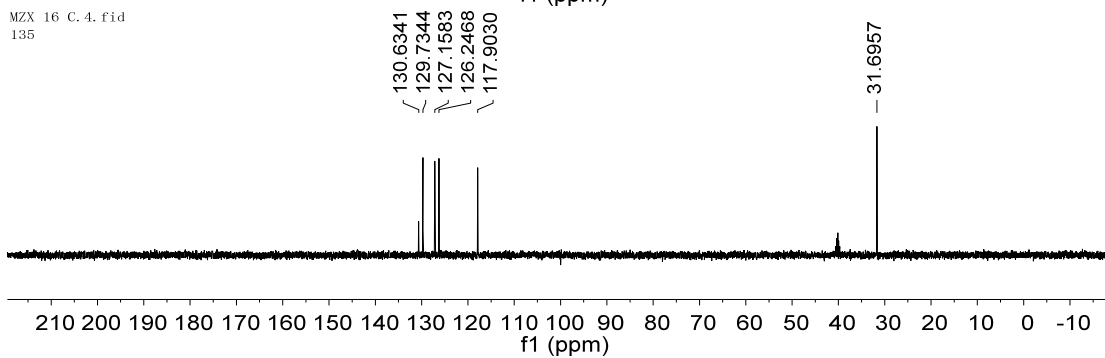

### 3e, <sup>1</sup>H NMR

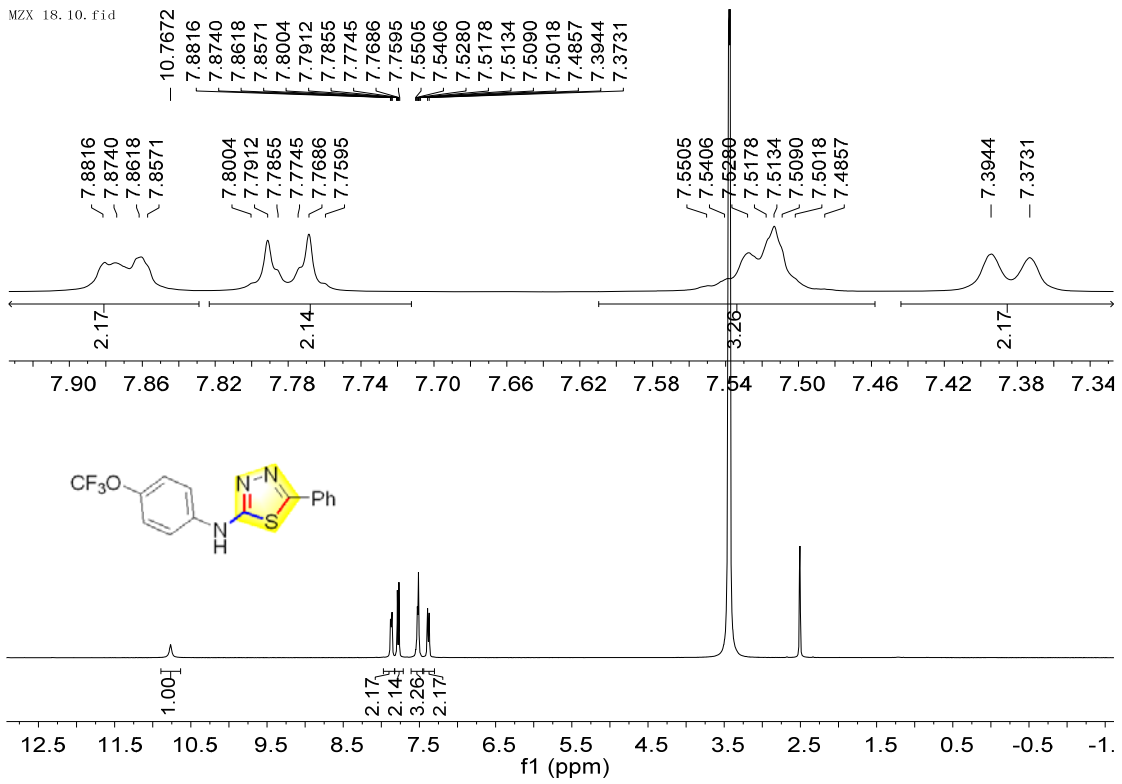

### <sup>13</sup>C NMR

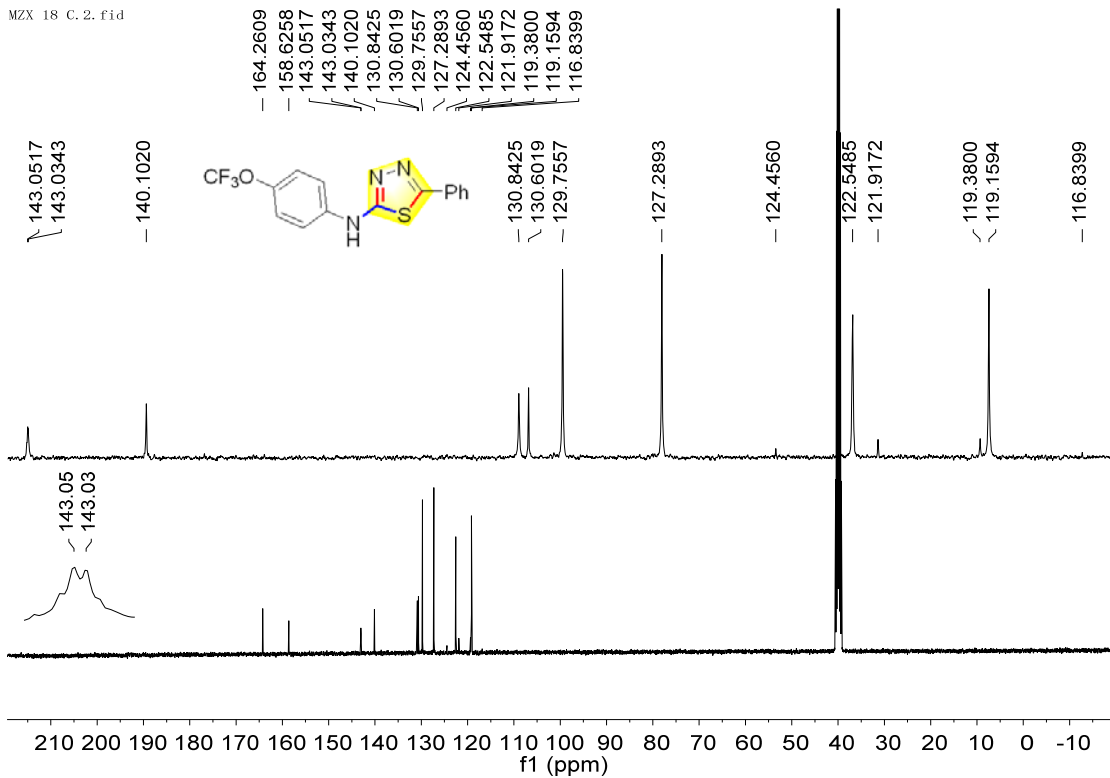

### DEPT 90 and DEPT 135

MZX 18 C. 3. fid  
90

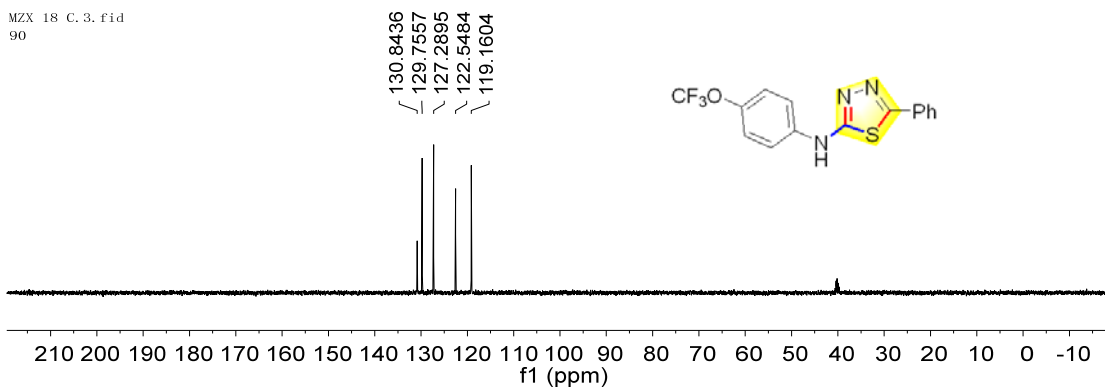

MZX 18 C. 4. fid  
135

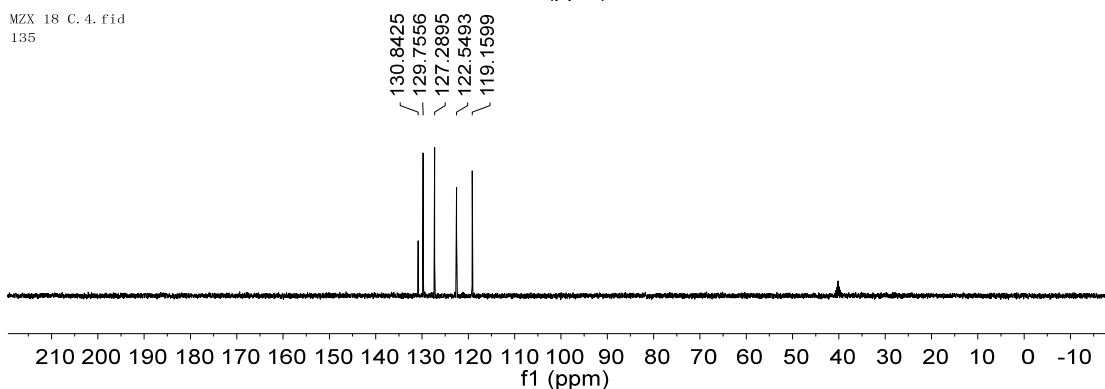

### <sup>19</sup>F NMR

MZX 18. 11. fid

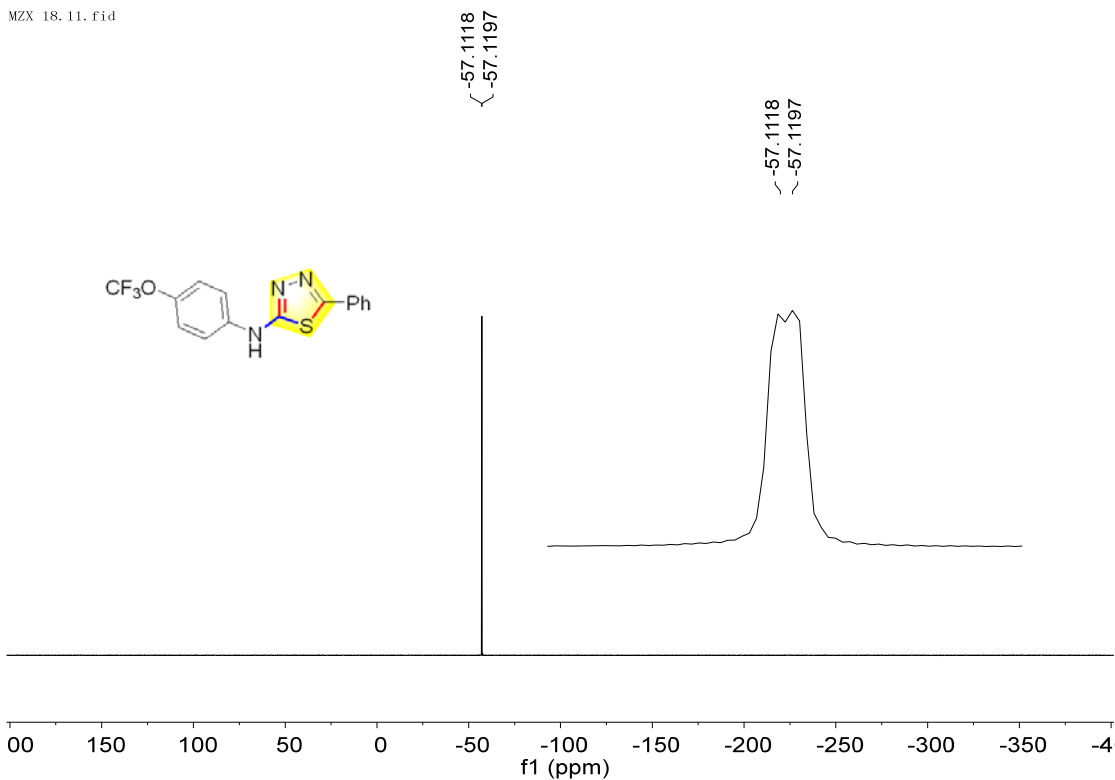

### 3f, <sup>1</sup>H NMR

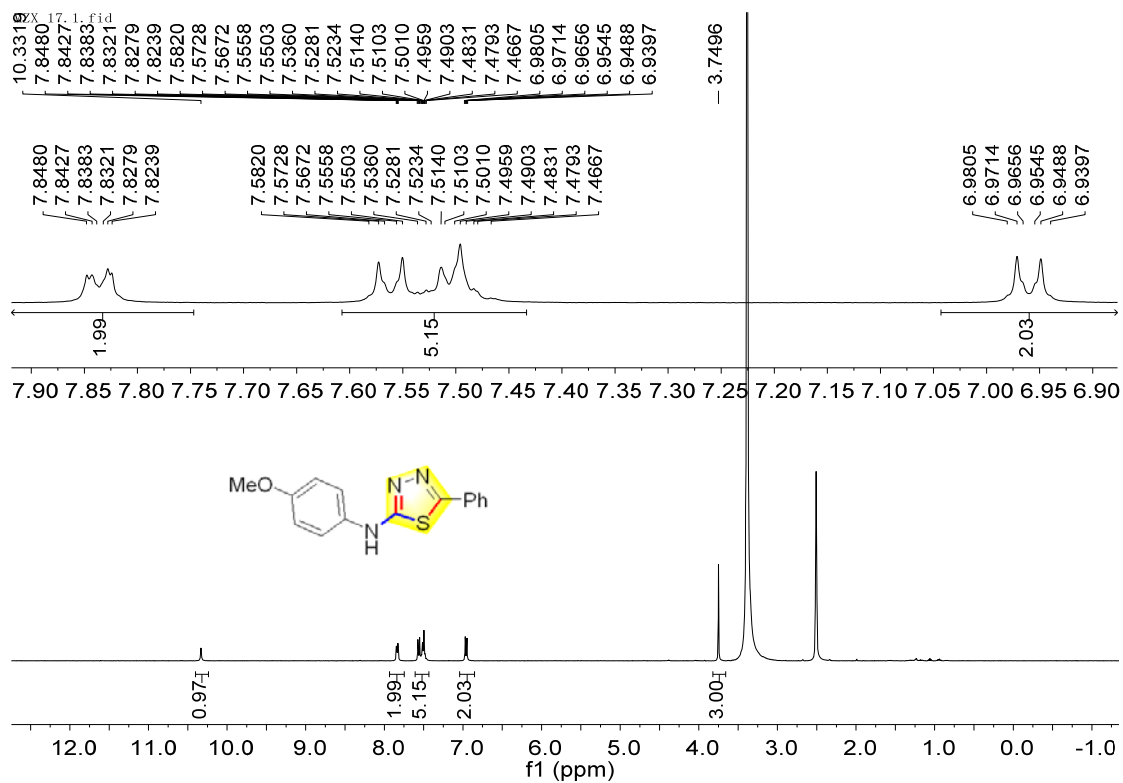

### <sup>13</sup>C NMR

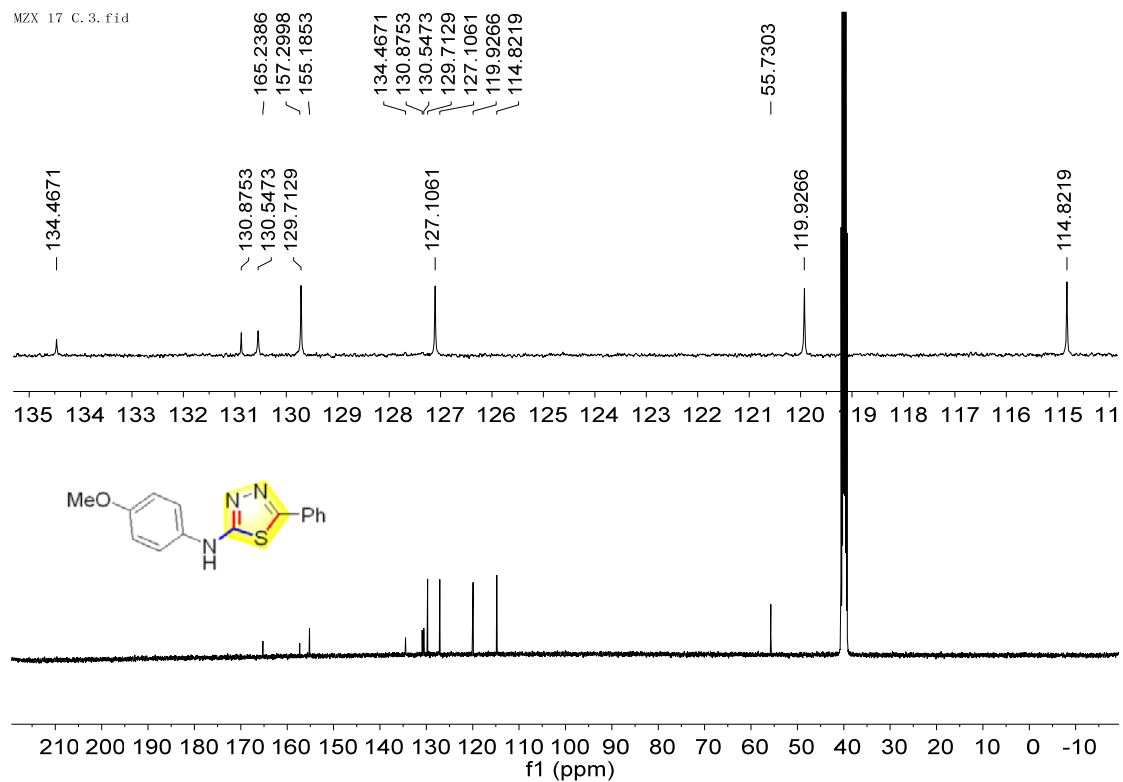

# DEPT 90 and DEPT 135

MZX 17 C. 4. fid  
90

130.5479  
129.7133  
127.1054  
119.9259  
114.8218

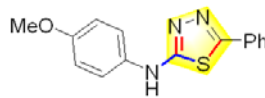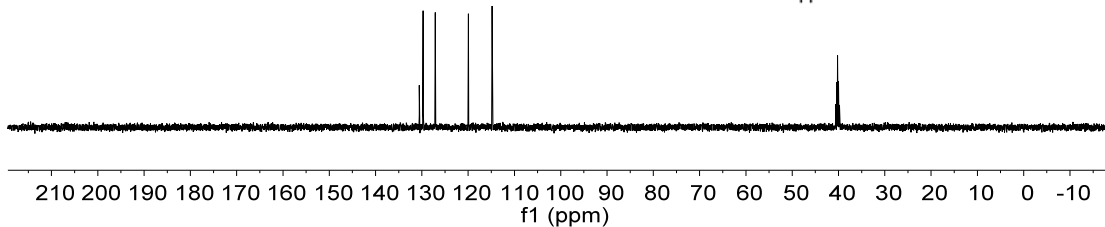

MZX 17 C. 5. fid  
135

130.5462  
129.7130  
127.1050  
119.9256  
114.8214

-55.7293

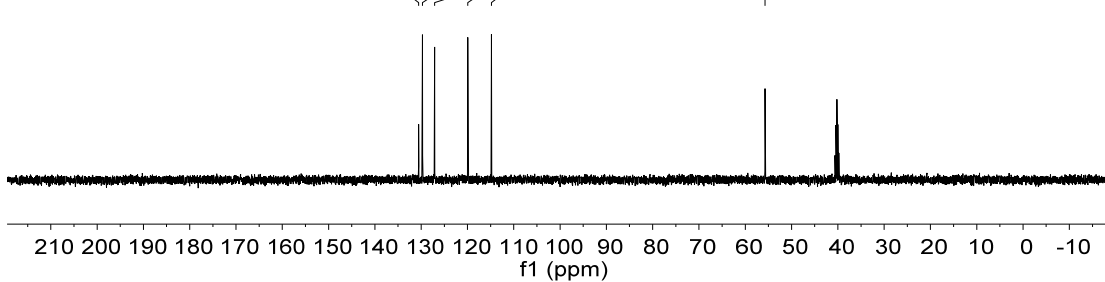

### 3g, <sup>1</sup>H NMR

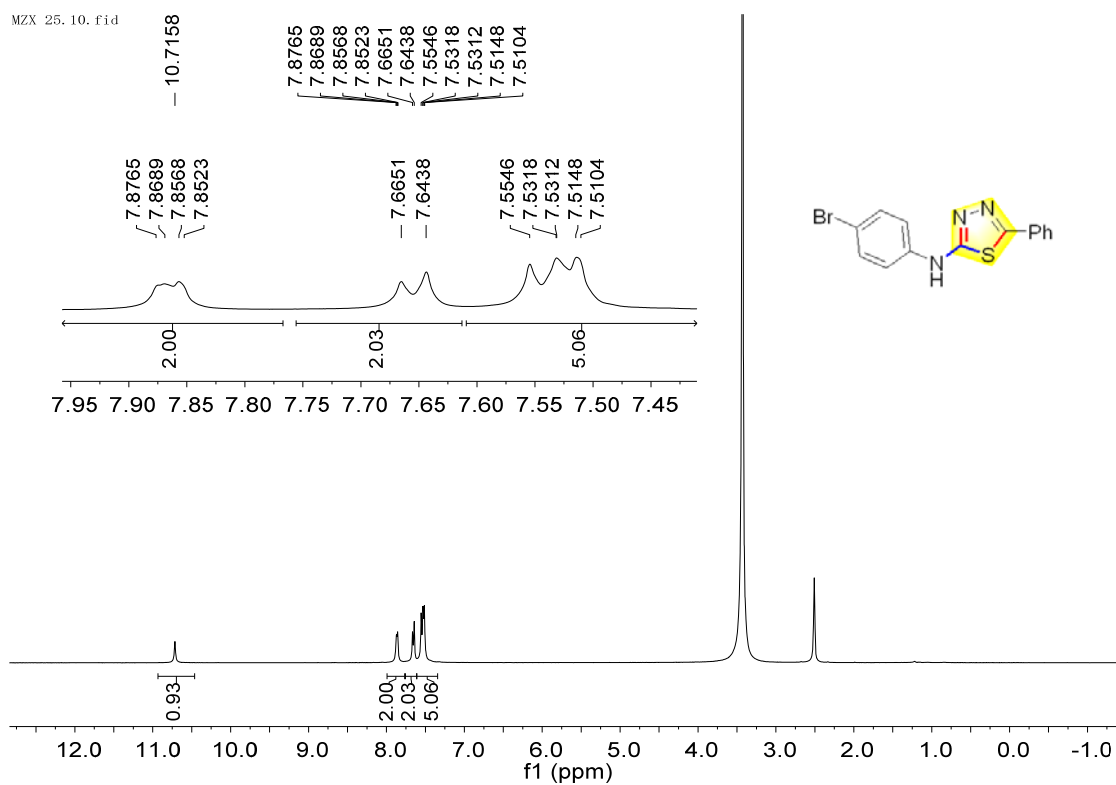

### <sup>13</sup>C NMR

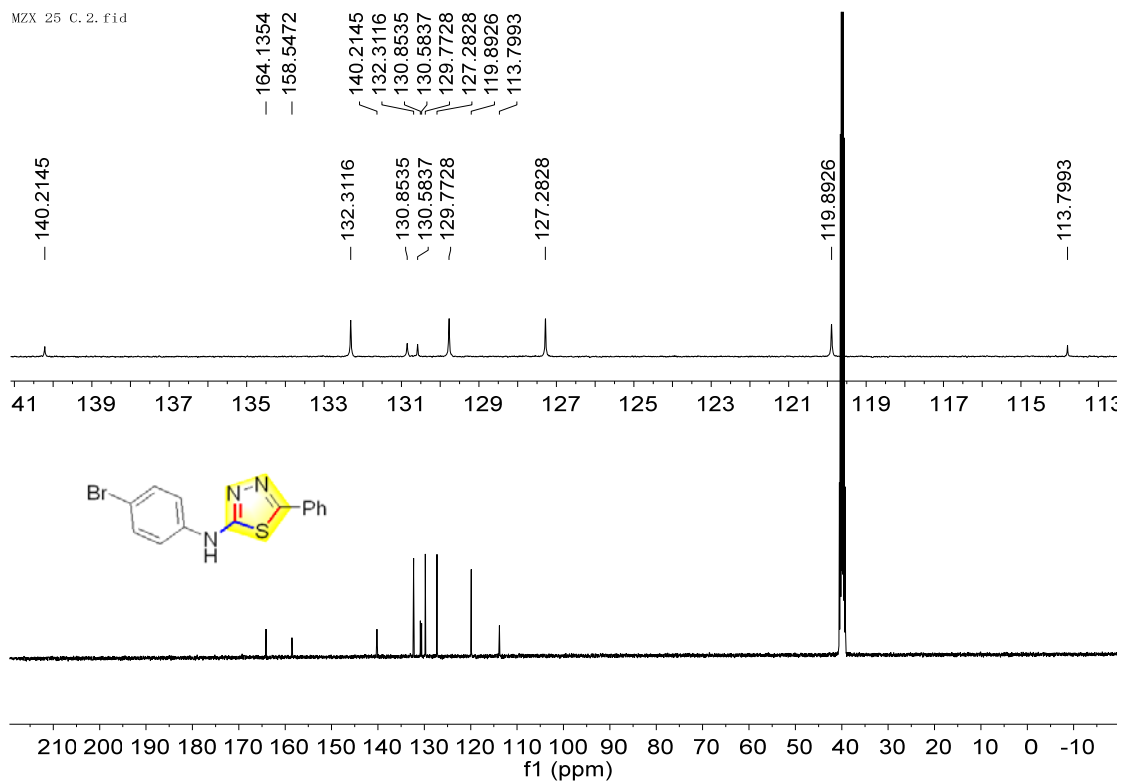



# DEPT 90 and DEPT 135

MZX 25 C. 3. fid  
90

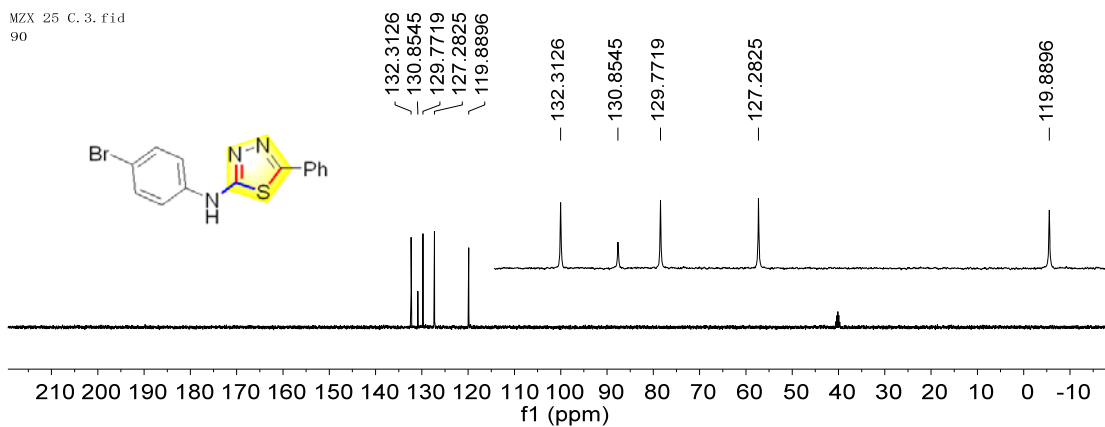

MZX 25 C. 4. fid  
135

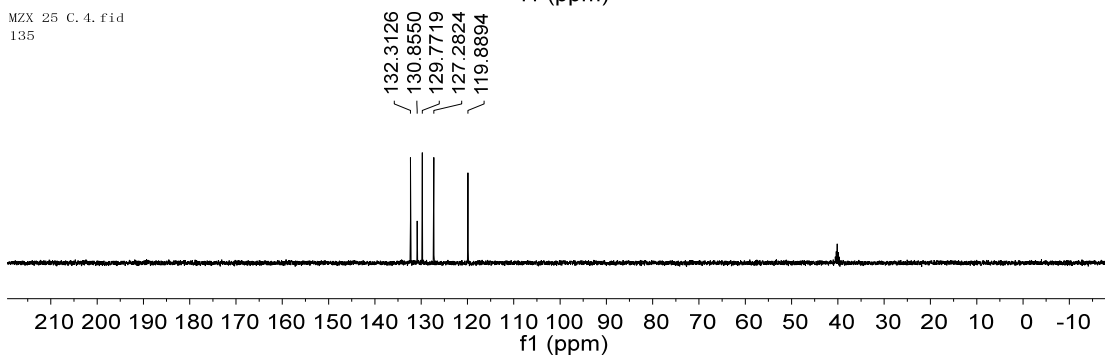

### 3h, <sup>1</sup>H NMR

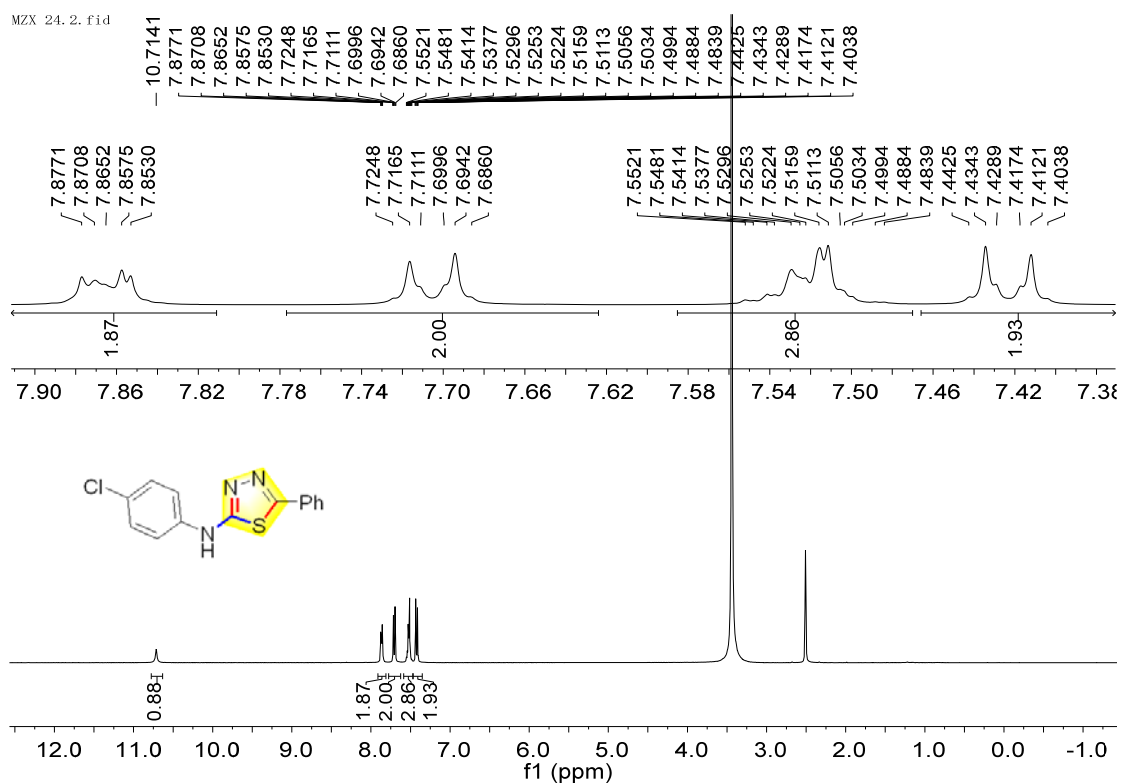

### <sup>13</sup>C NMR

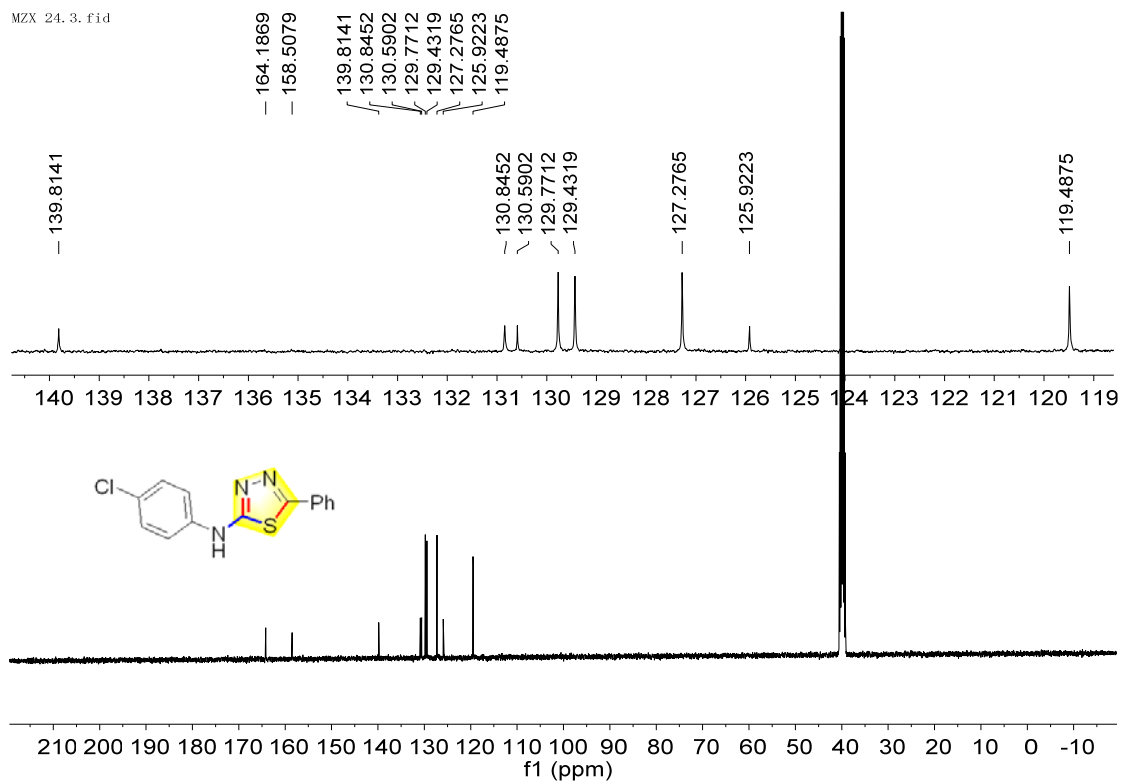

# DEPT 90 and DEPT 135

MZX 24.4.fid  
90

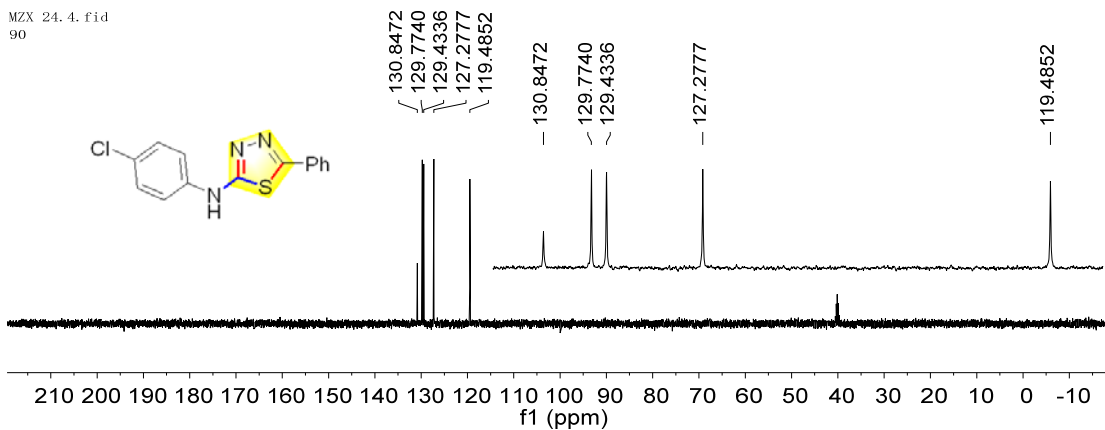

MZX 24.5.fid  
135

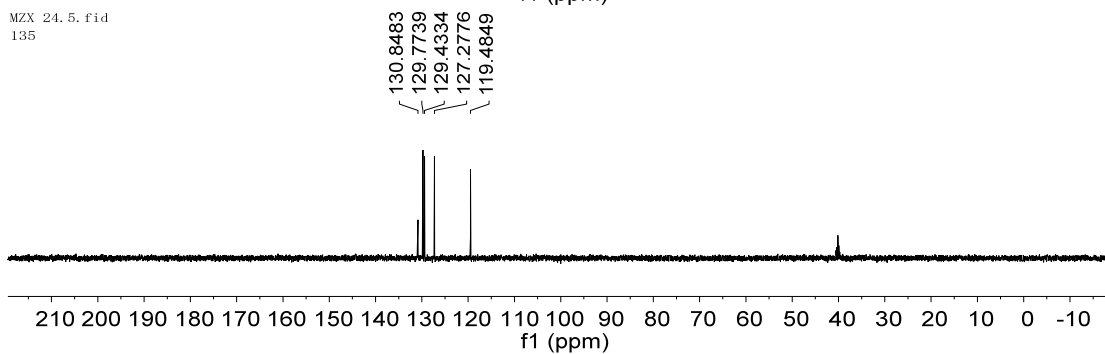

### 3i, <sup>1</sup>H NMR

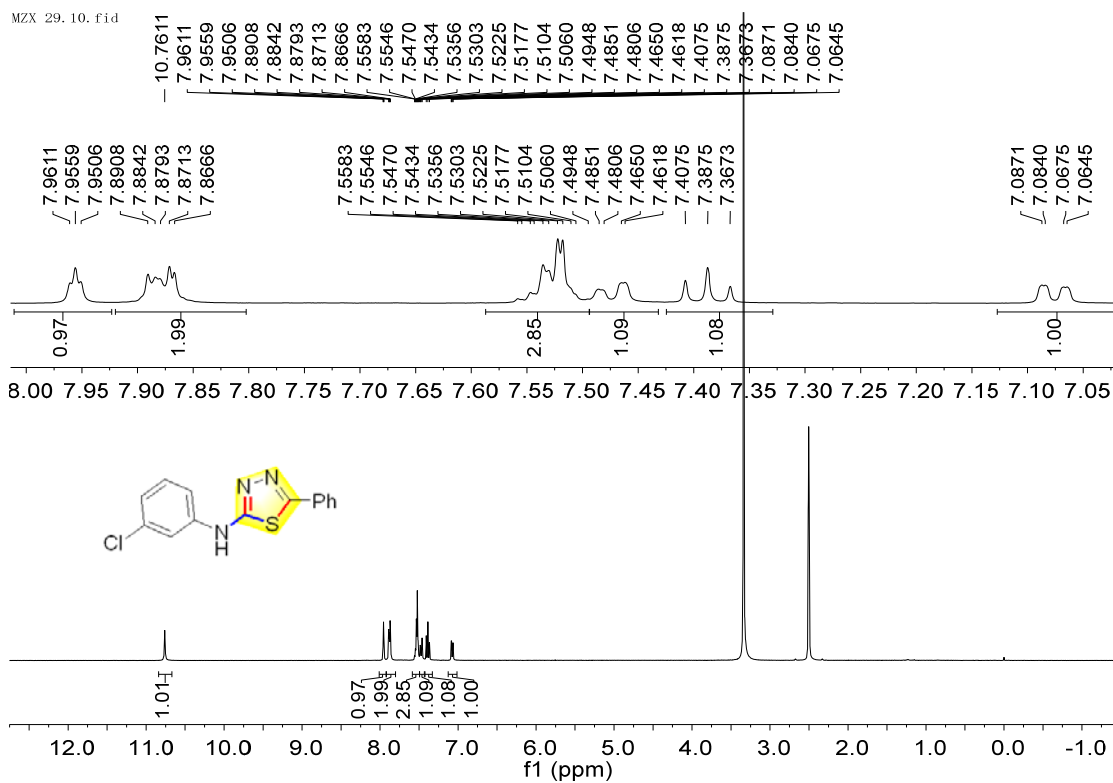

### <sup>13</sup>C NMR

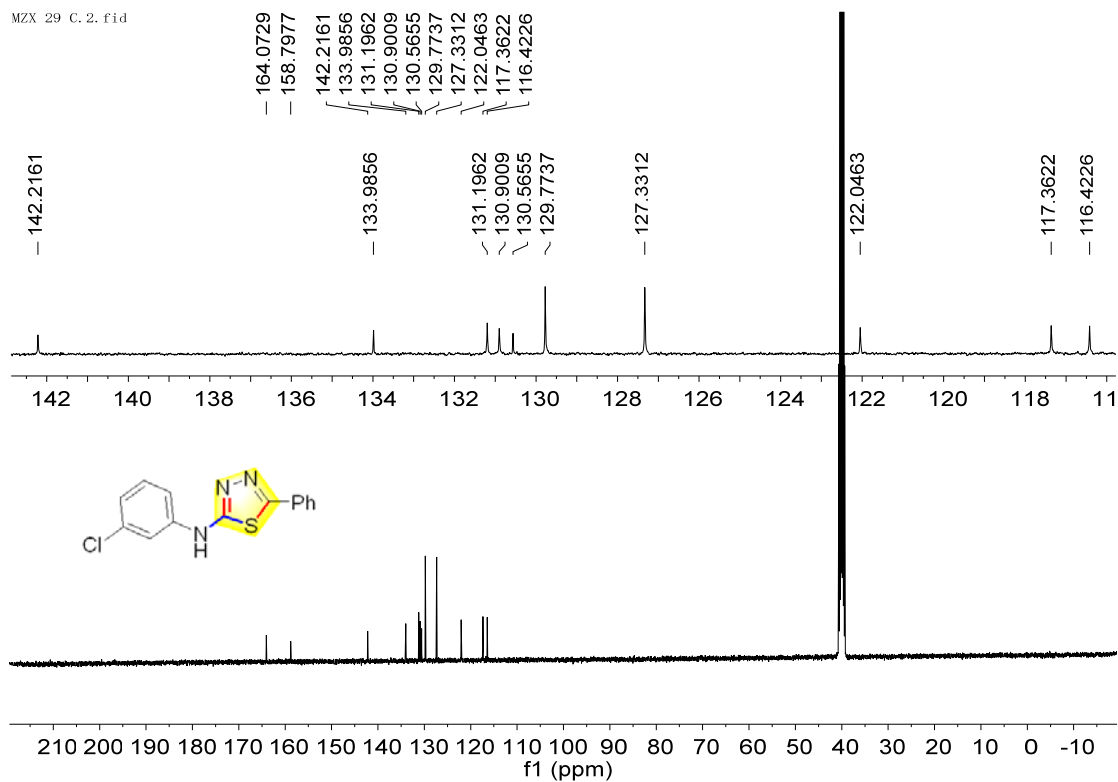

# DEPT 90 and DEPT 135

MZX 29 C. 3. fid  
90

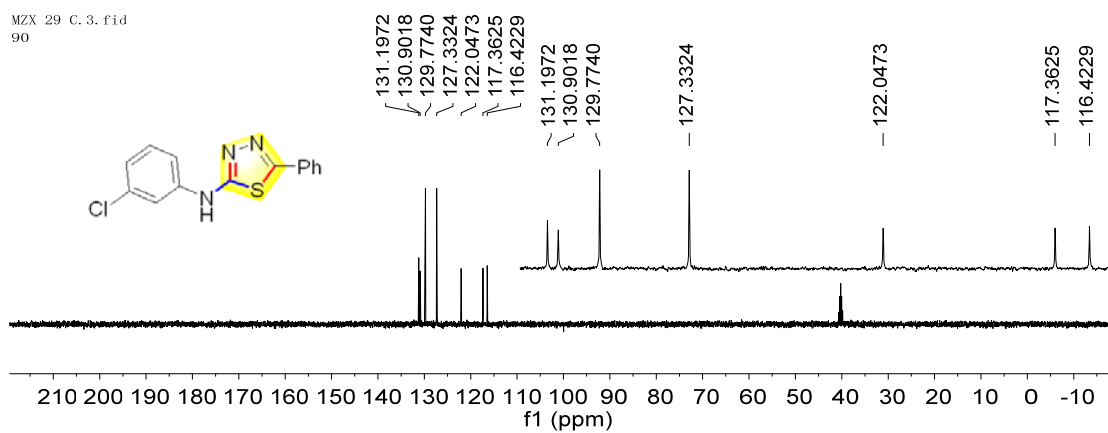

MZX 29 C. 4. fid  
135

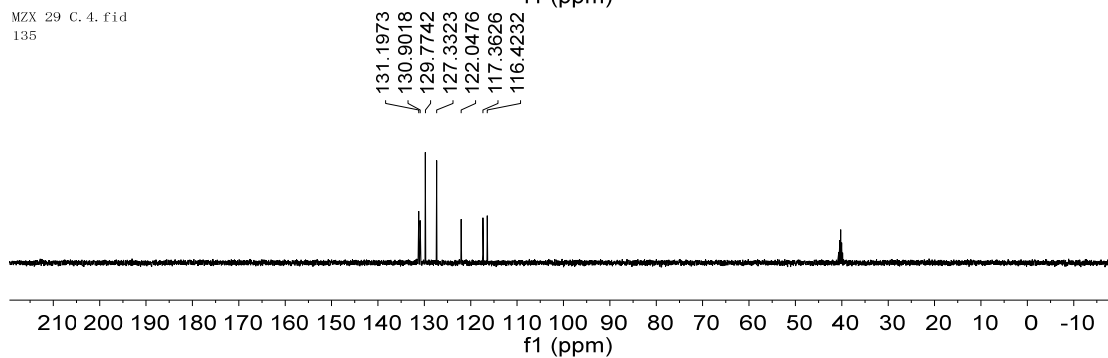

### 3j, <sup>1</sup>H NMR

MZX 23.10. fid

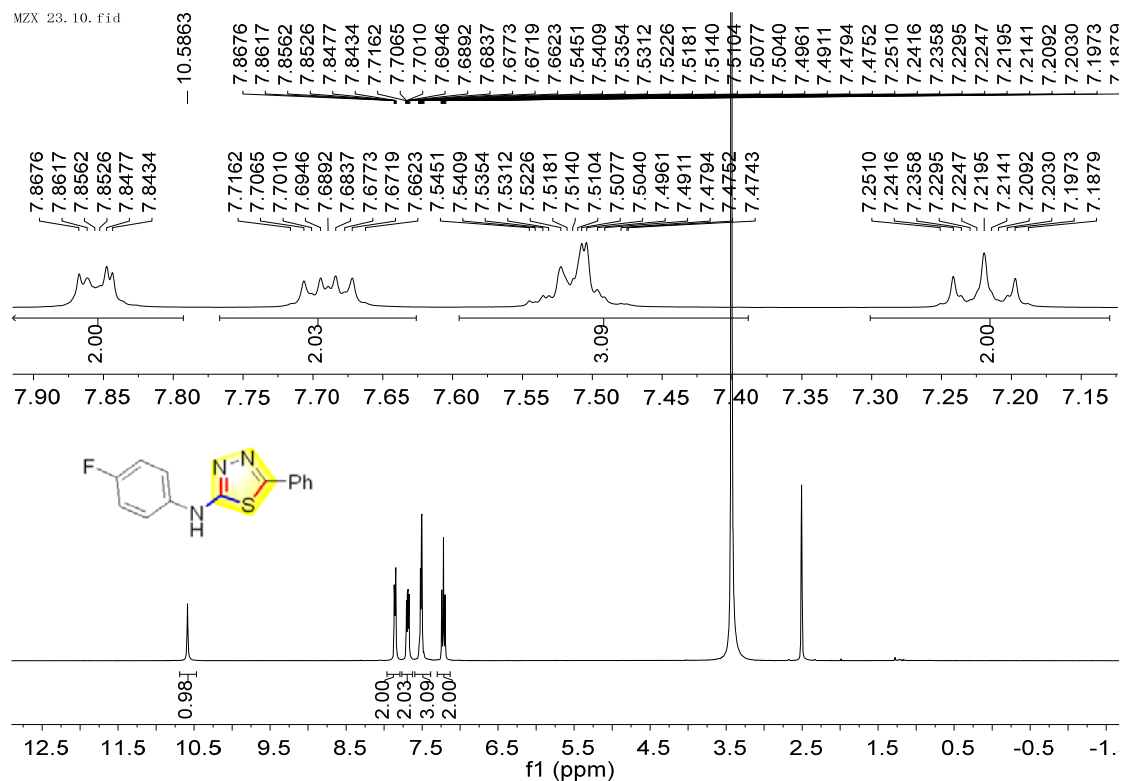

### <sup>13</sup>C NMR

MZX 23 C.4. fid

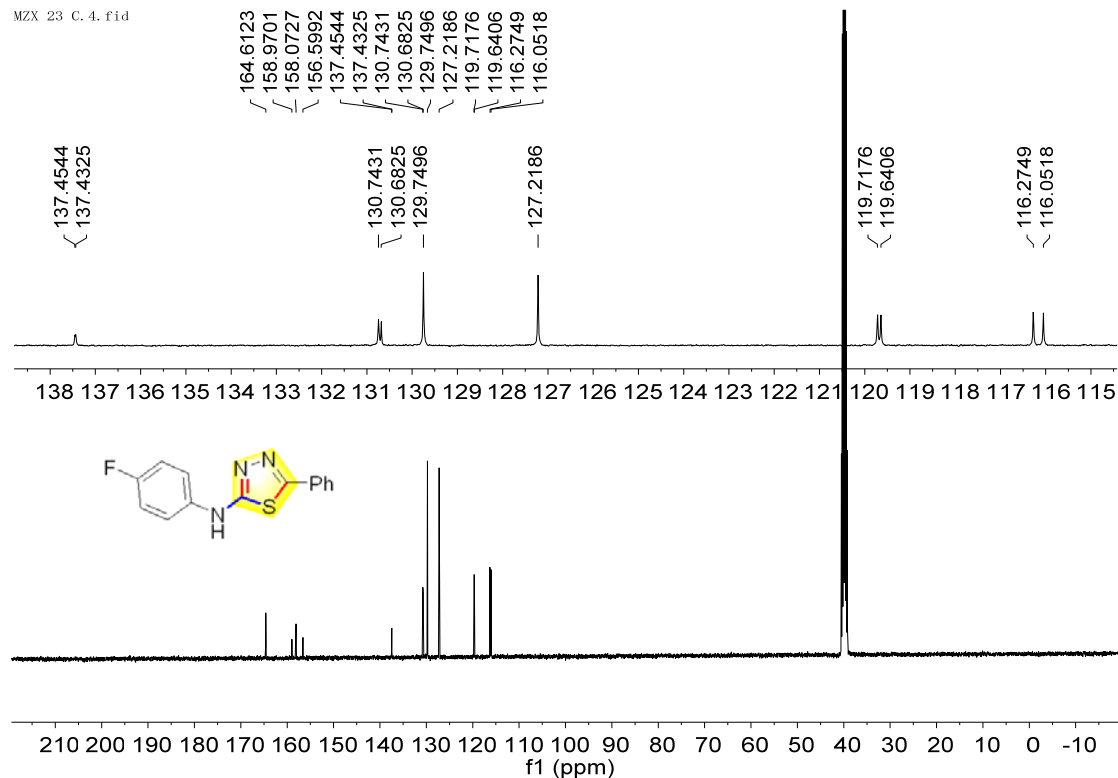

### DEPT 90 and DEPT 135

MZX 23 C. 5. fid  
90

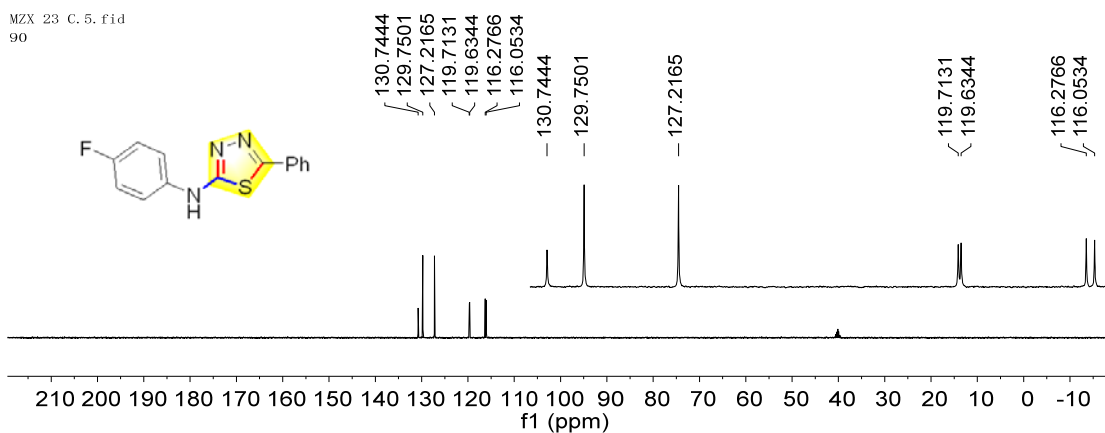

MZX 23 C. 6. fid  
135

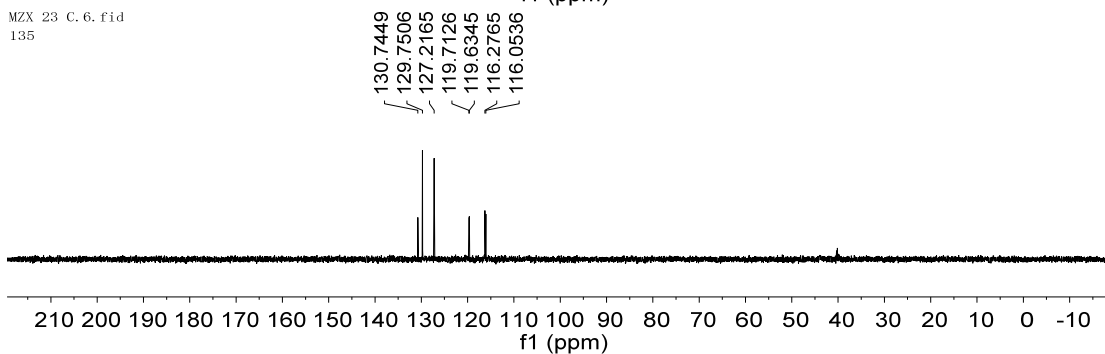

### <sup>19</sup>F NMR

MZX 23 C. 1. fid

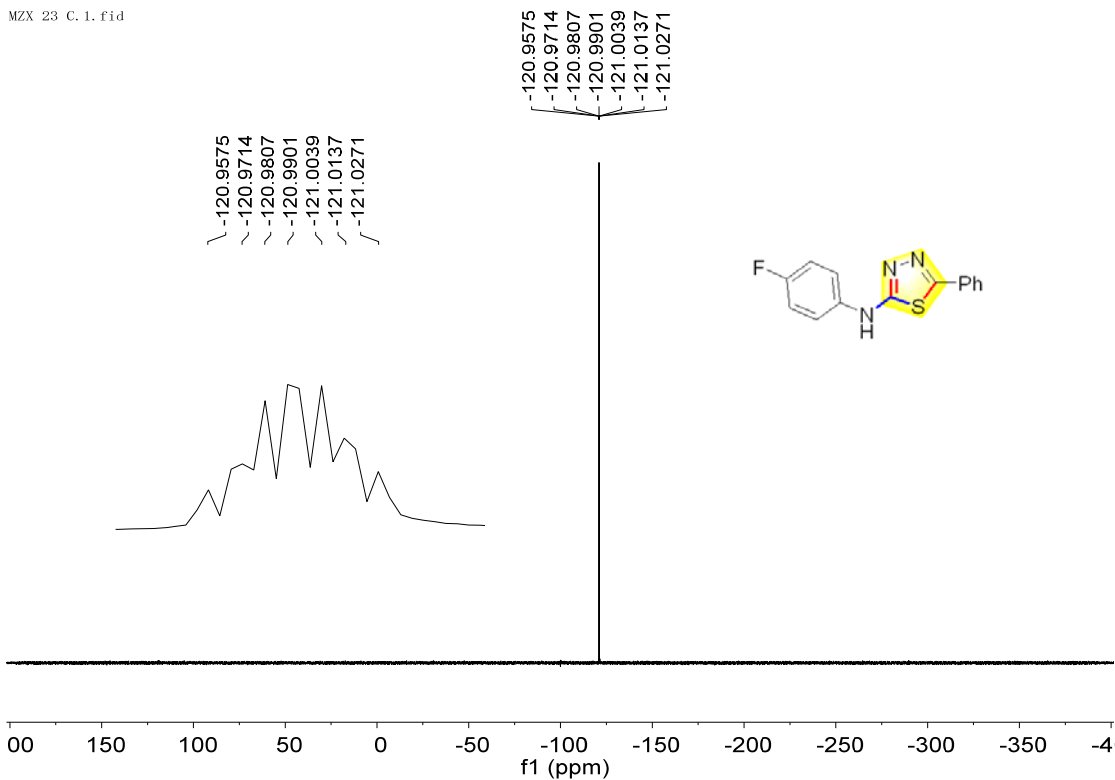

### 3k, <sup>1</sup>H NMR

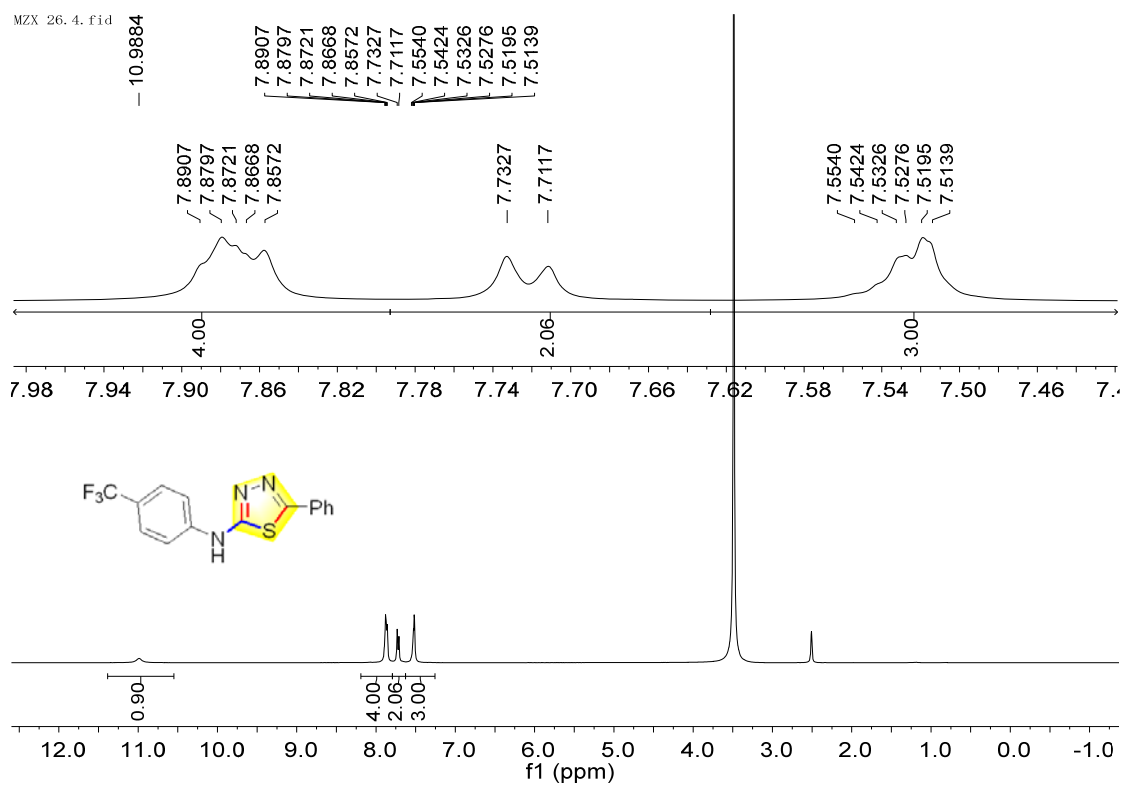

### <sup>13</sup>C NMR

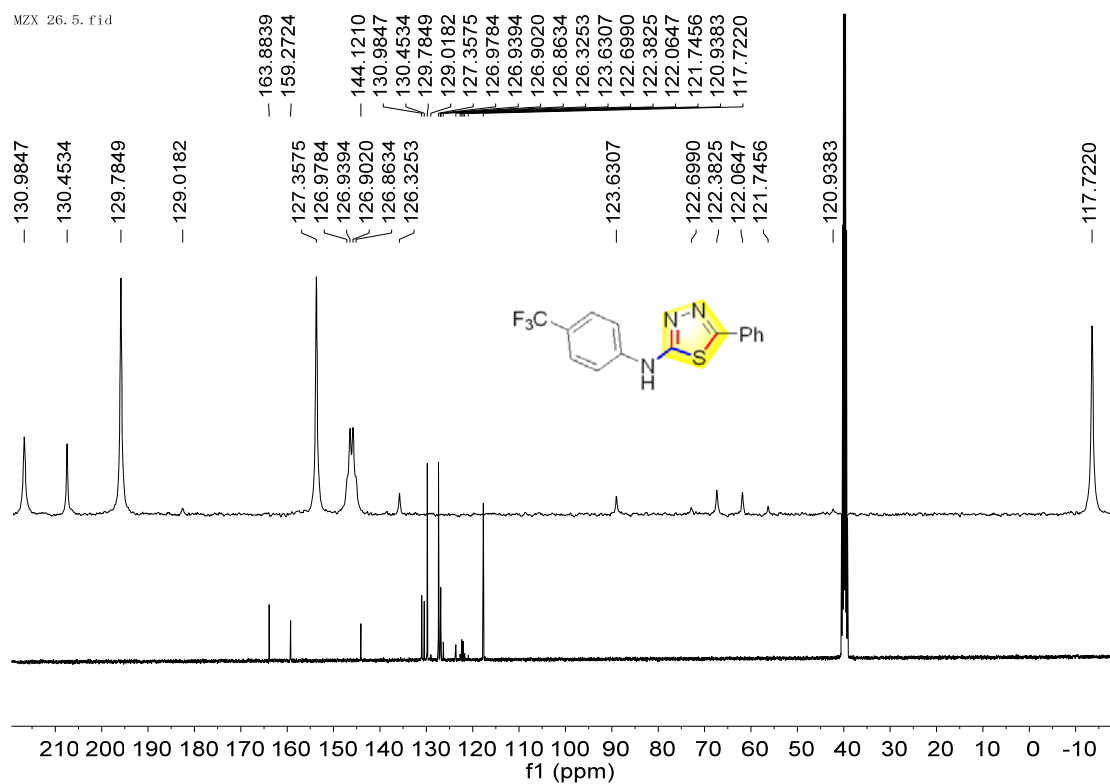



### DEPT 90 and DEPT 135

MZX 26.6.fid  
90

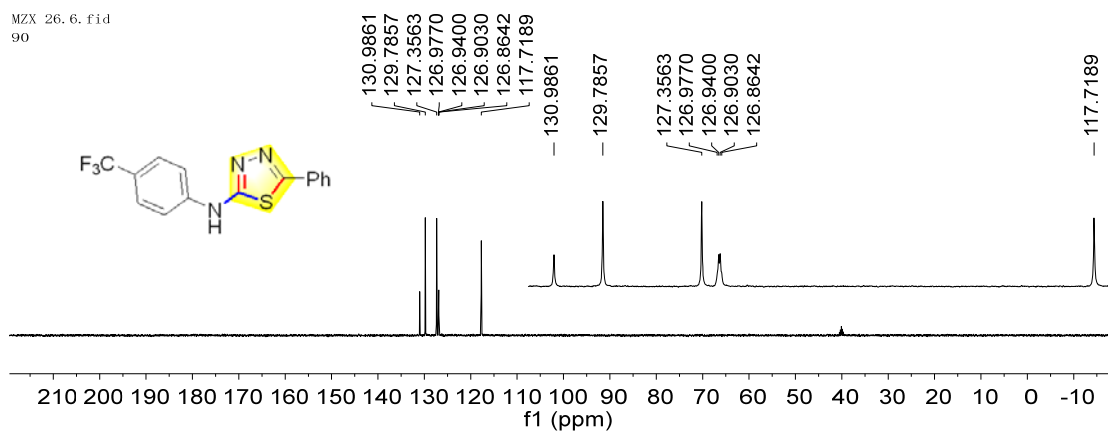

MZX 26.7.fid  
135

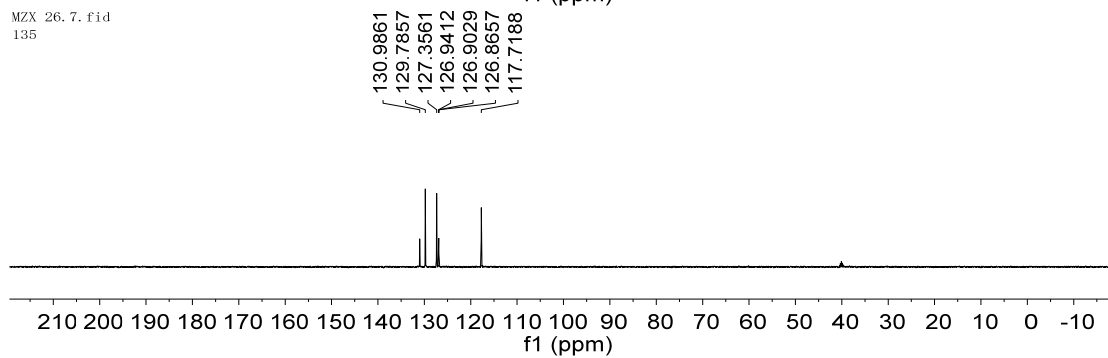

### <sup>19</sup>F NMR

MZX 26.1.fid  
F, NO DC

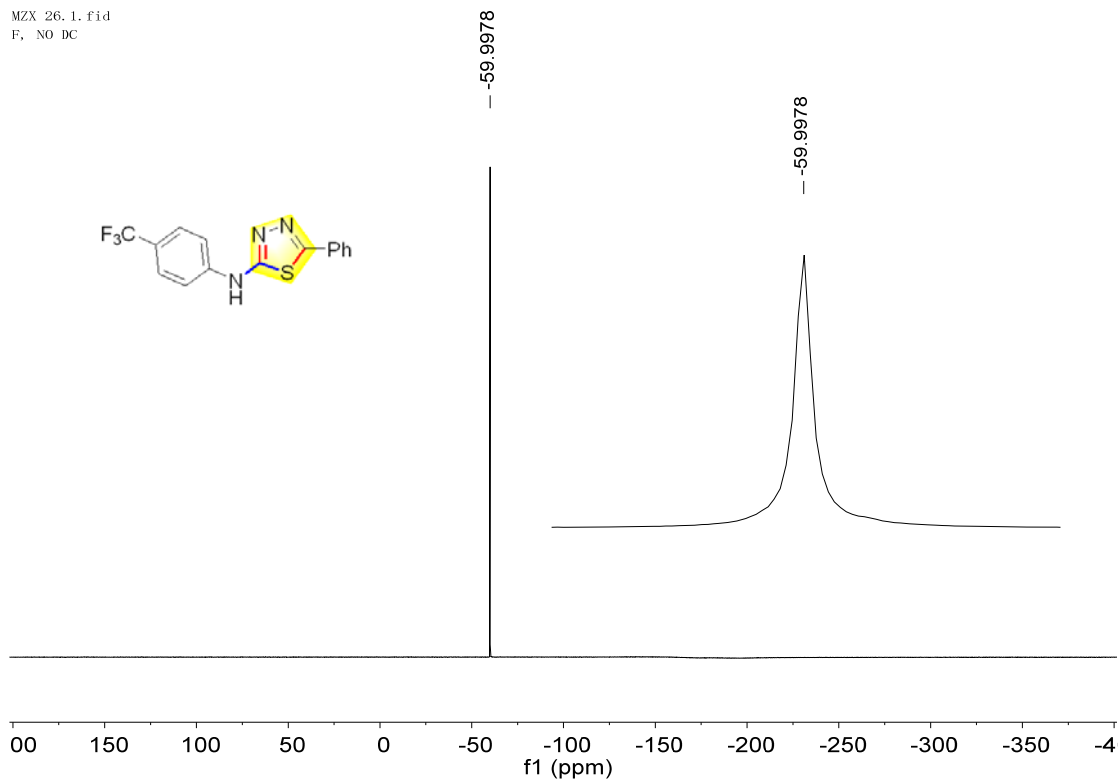

### 31, <sup>1</sup>H NMR

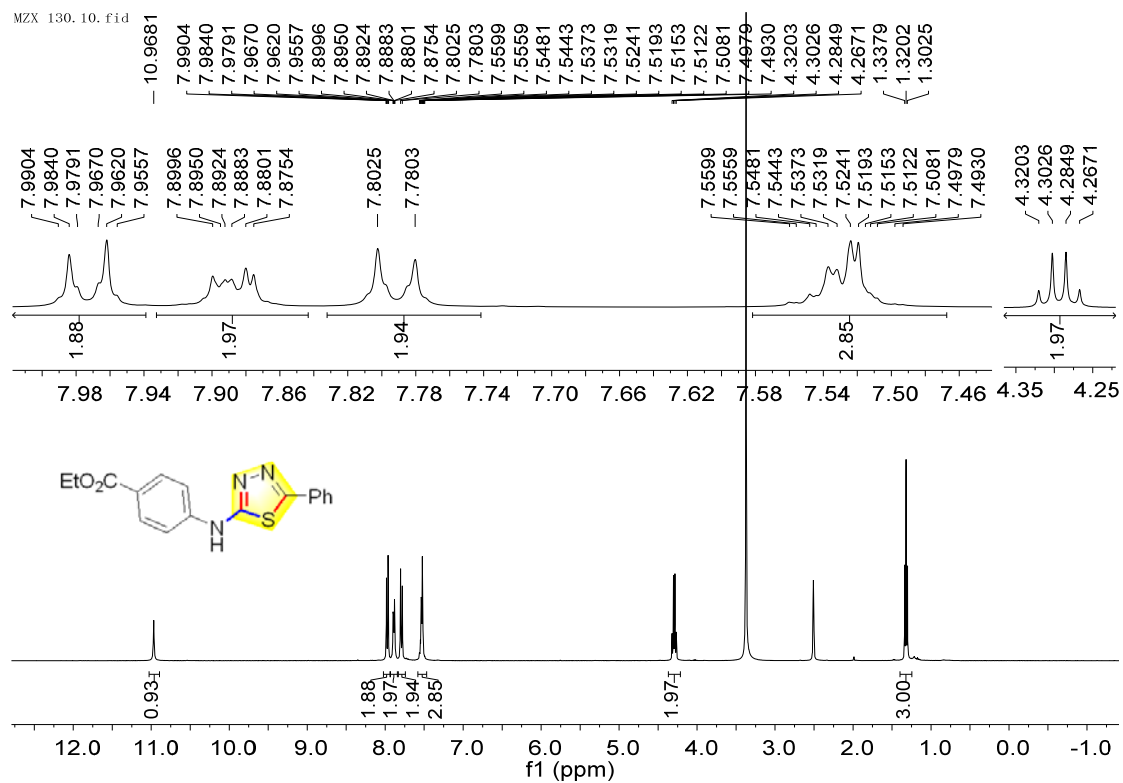

### <sup>13</sup>C NMR

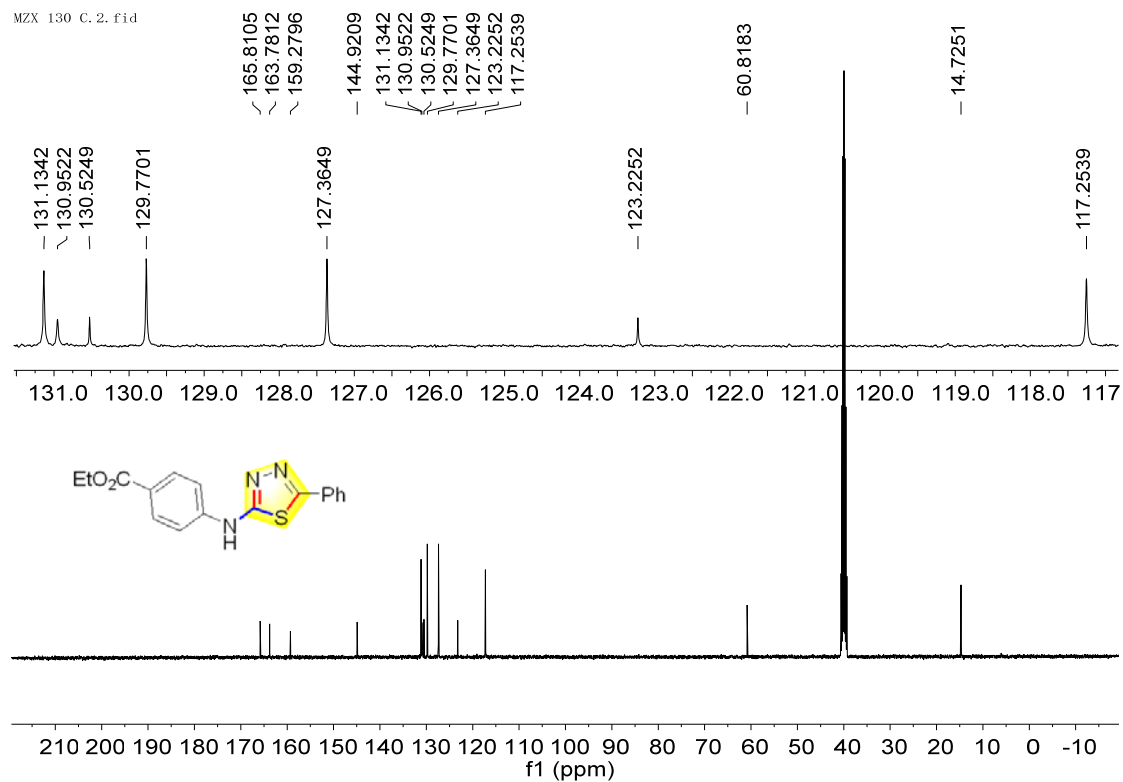

# DEPT 90 and DEPT 135

MZX 130 C. 3. fid  
90

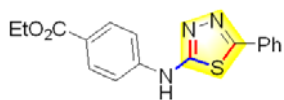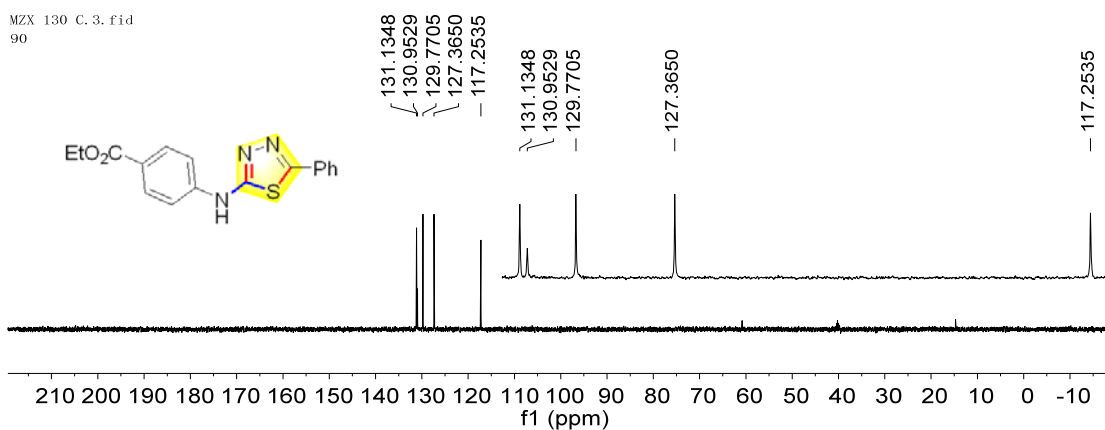

MZX 130 C. 4. fid  
135

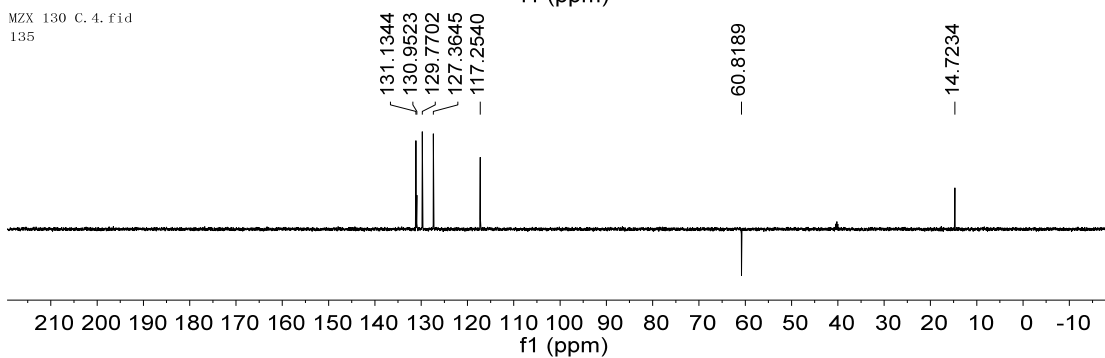

### 3m, <sup>1</sup>H NMR

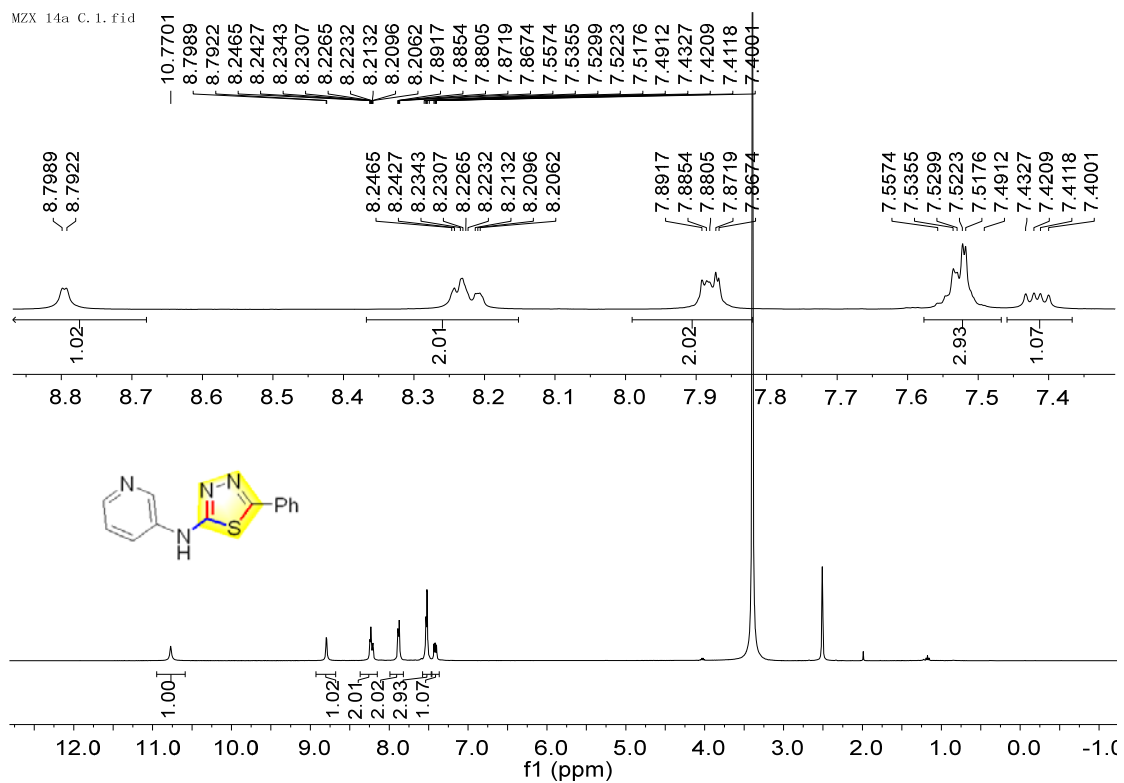

### <sup>13</sup>C NMR

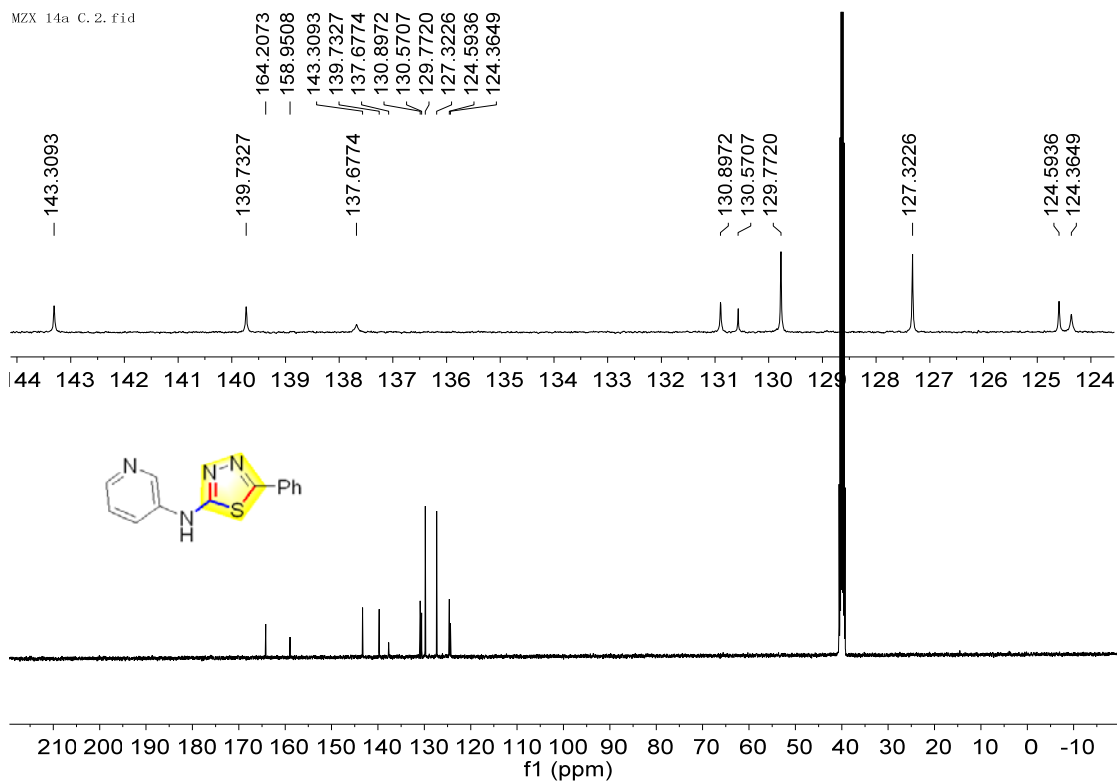

# DEPT 90 and DEPT 135

MZX 14a C. 3. fid  
90

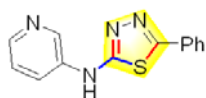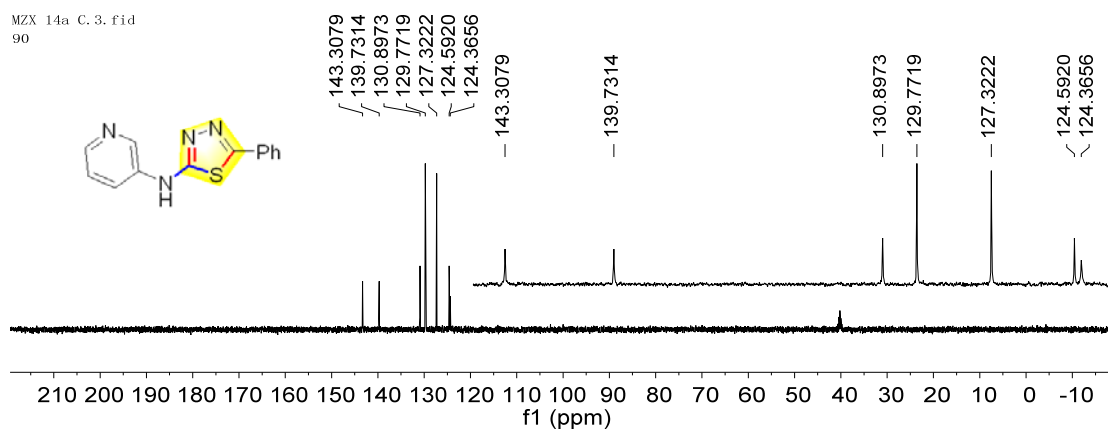

MZX 14a C. 4. fid  
135

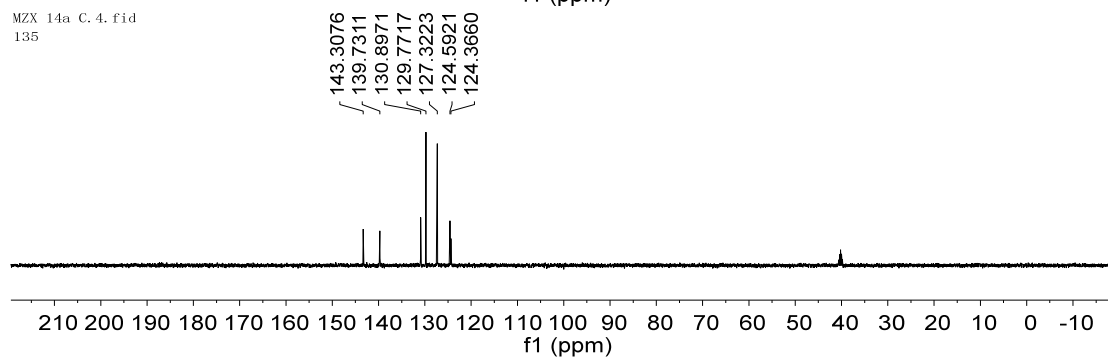

### 3n, <sup>1</sup>H NMR

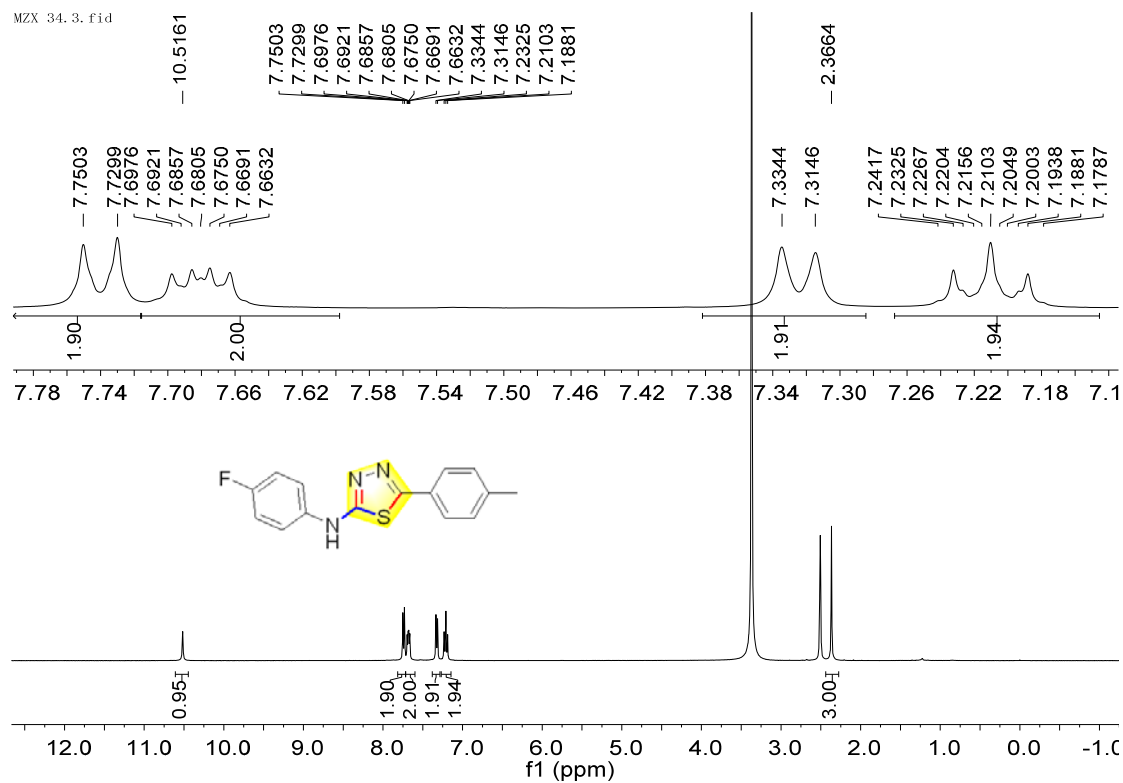

### <sup>13</sup>C NMR

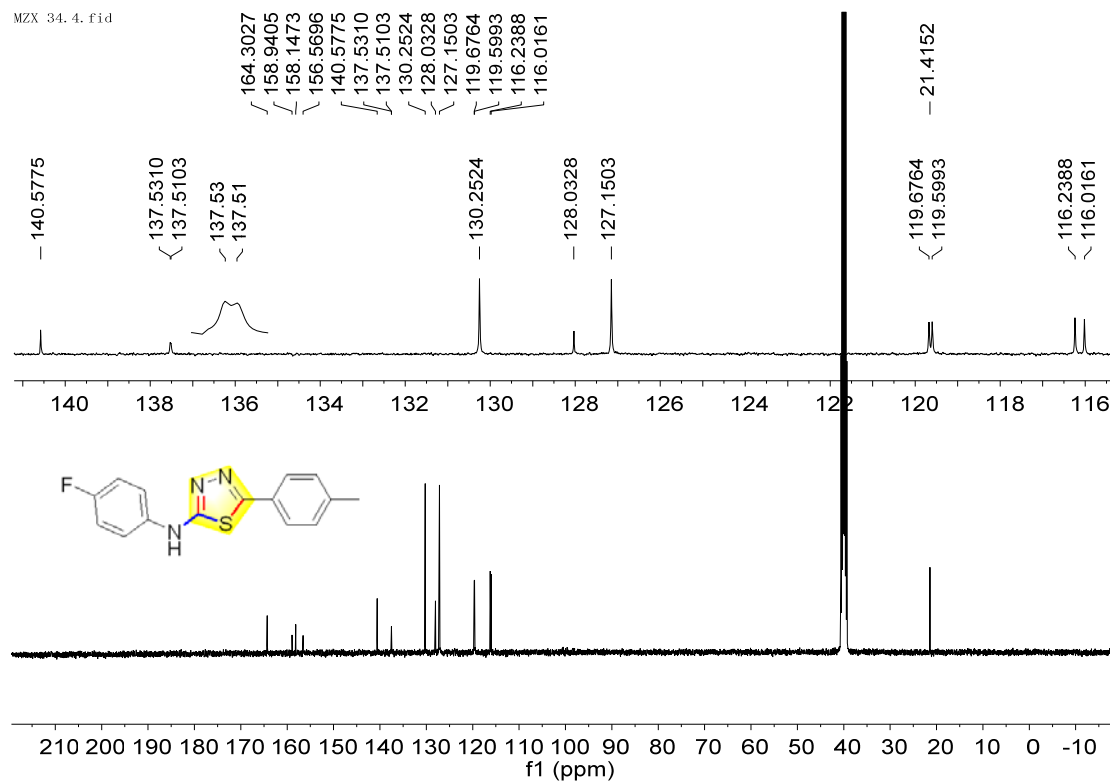

### DEPT 90 and DEPT 135

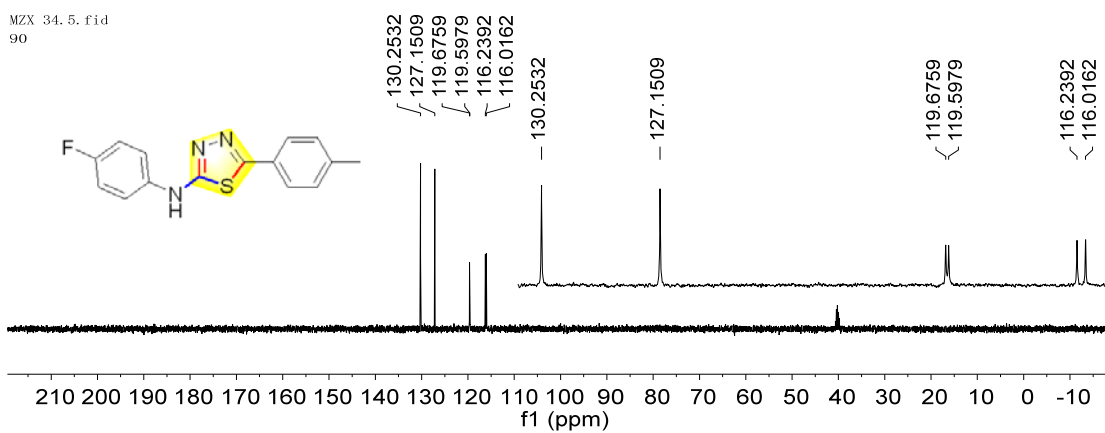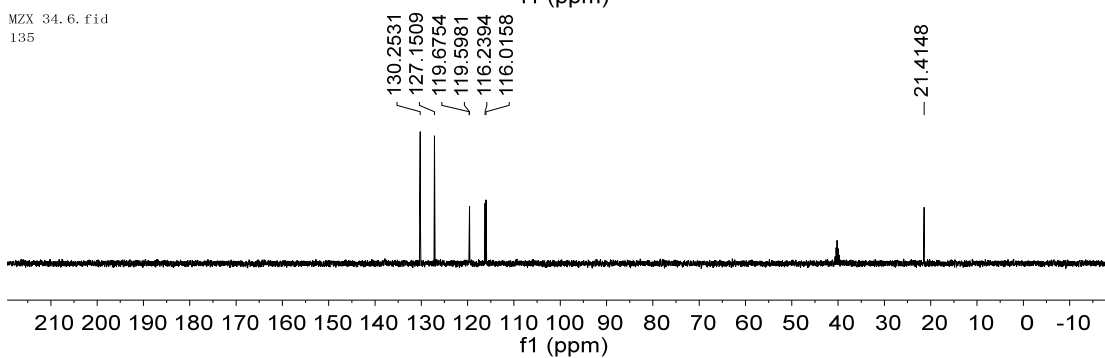

### <sup>19</sup>F NMR

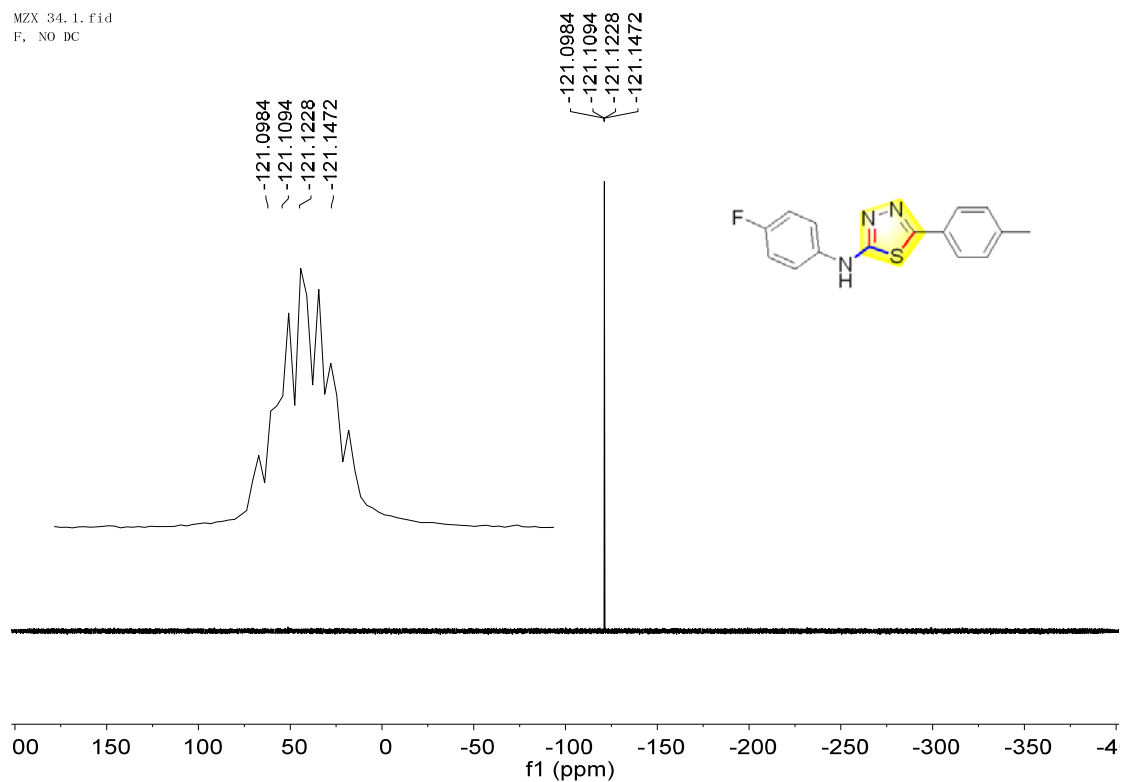

### 30, <sup>1</sup>H NMR

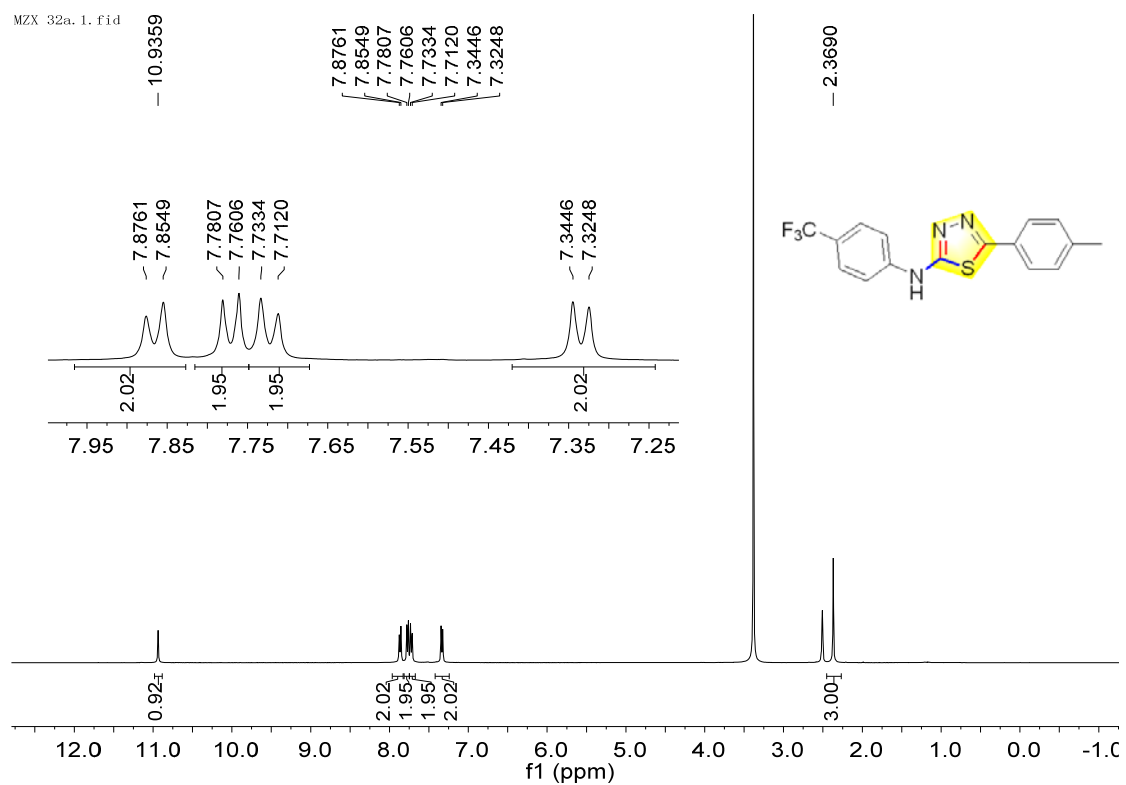

### <sup>13</sup>C NMR

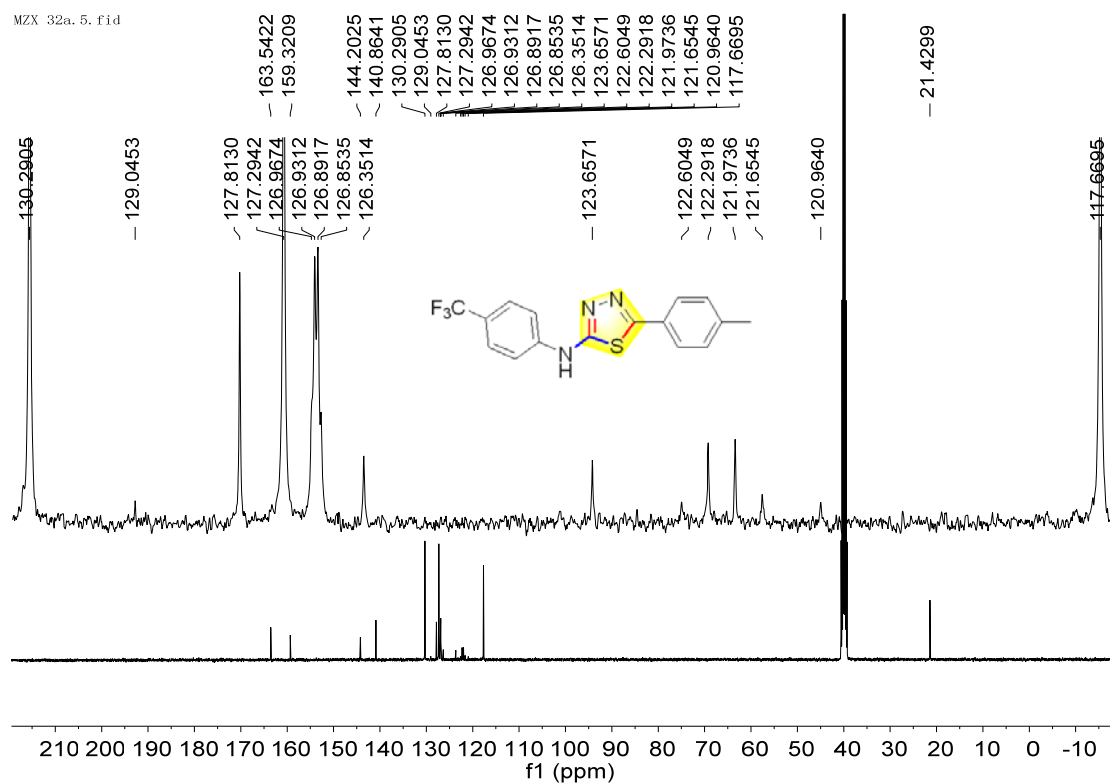



### DEPT 90 and DEPT 135

MZX 32a. 6. fid  
90

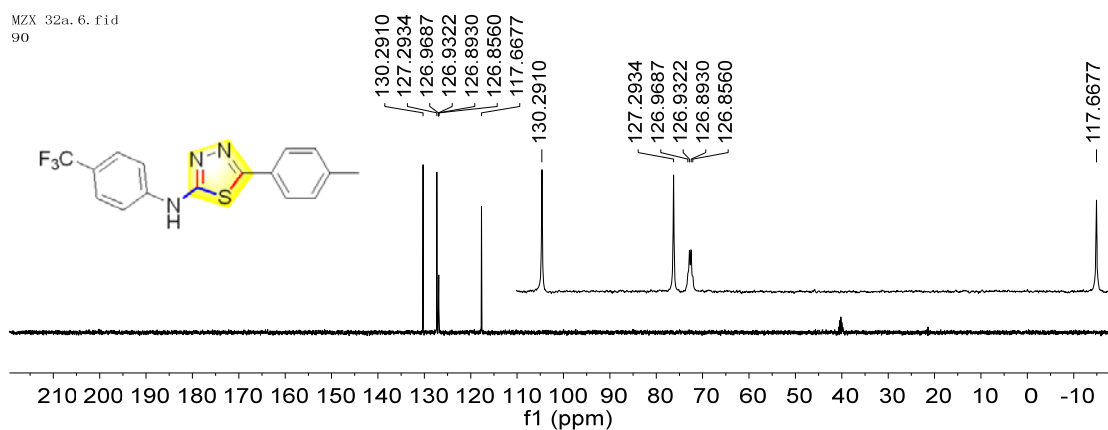

MZX 32a. 7. fid  
135

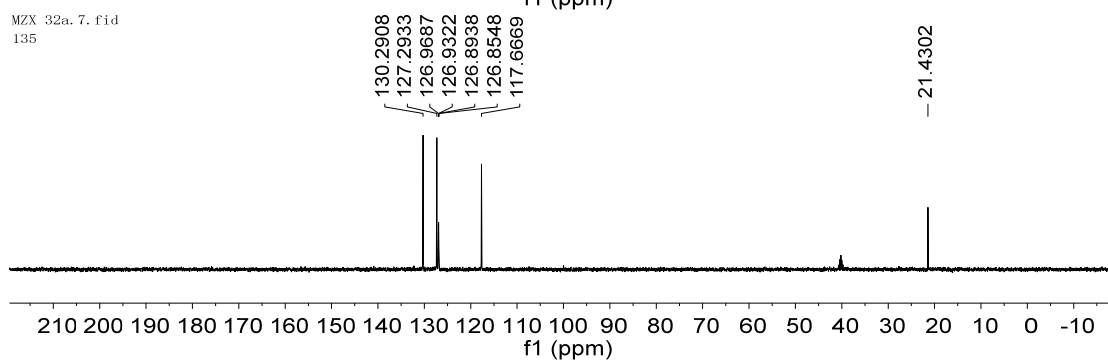

### <sup>19</sup>F NMR

MZX 32a. 2. fid  
f, no dc

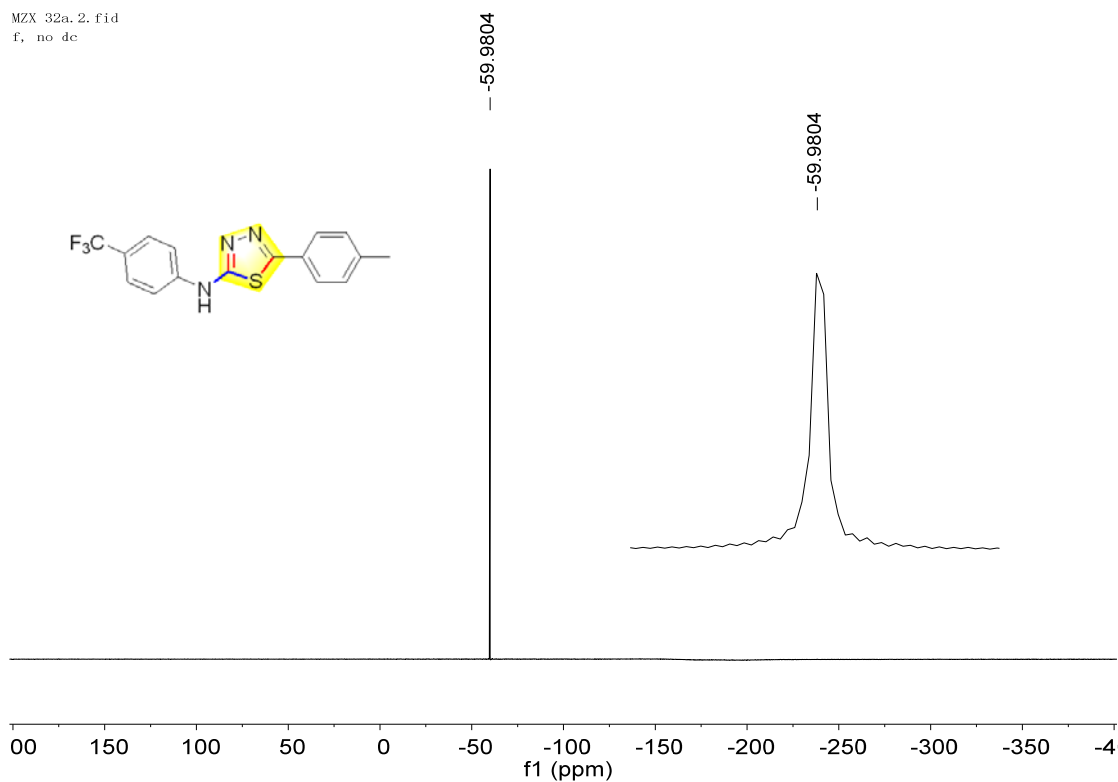

### 3p, <sup>1</sup>H NMR

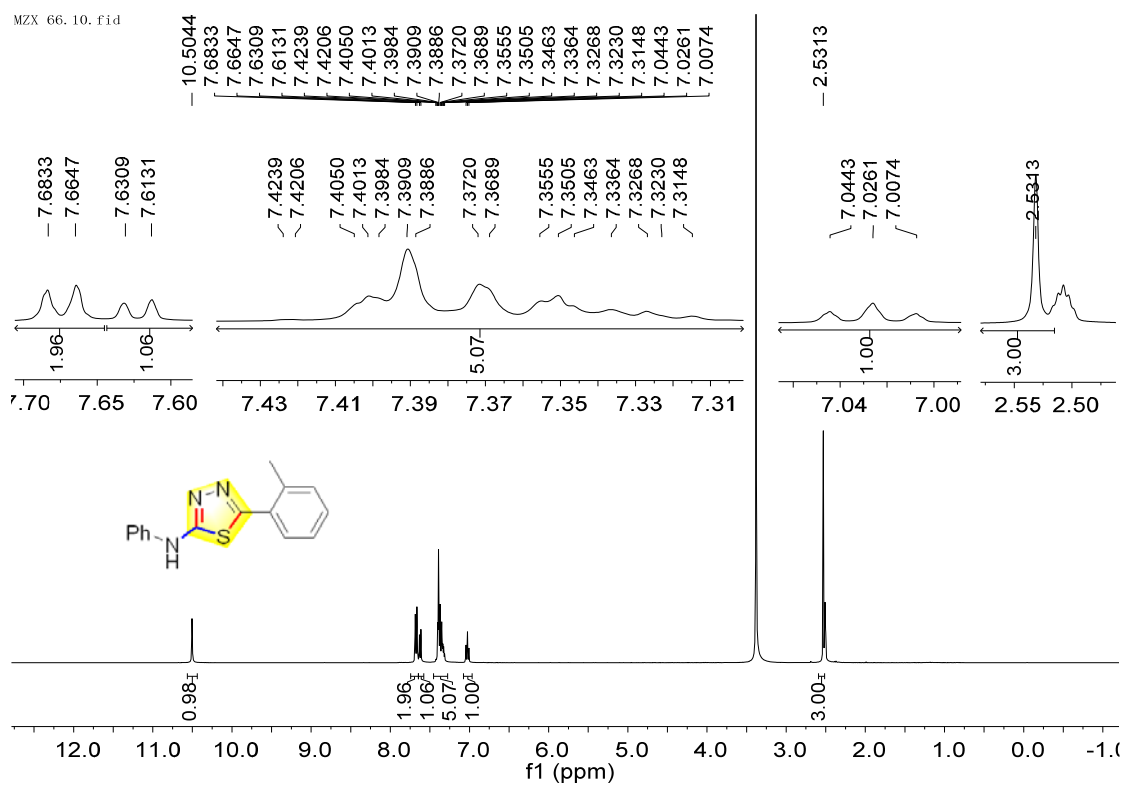

### <sup>13</sup>C NMR

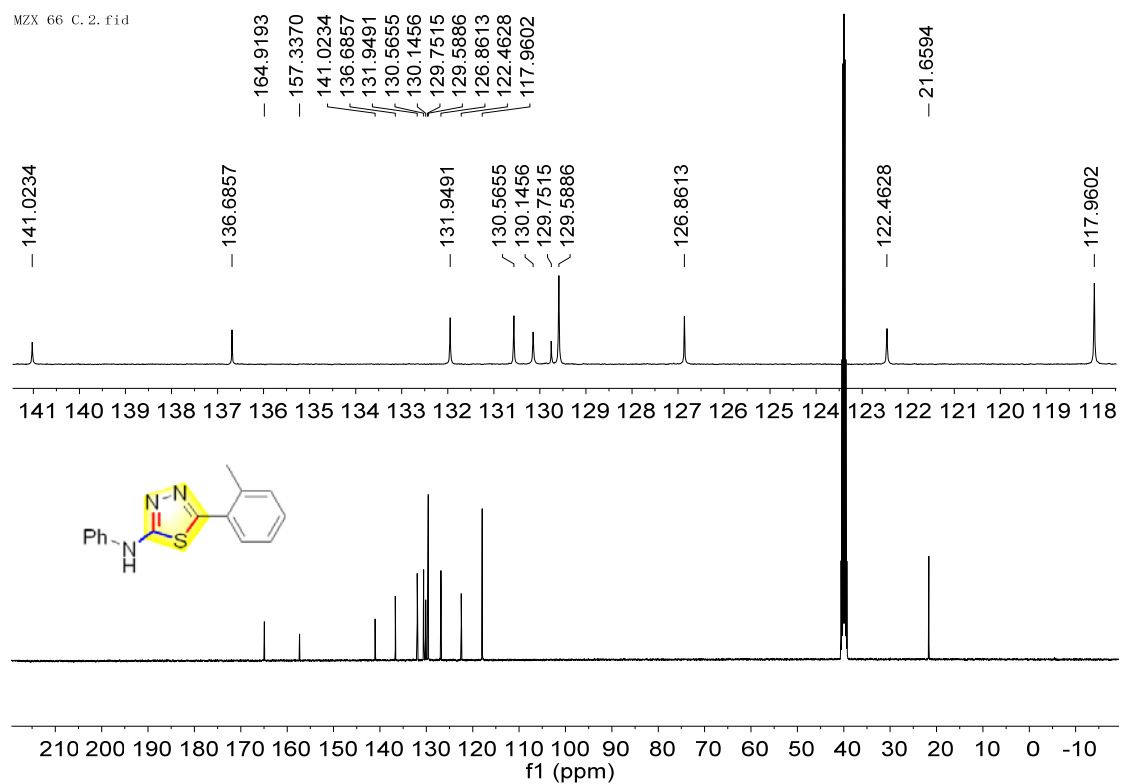

# DEPT 90 and DEPT 135

MZX 66 C. 3. fid  
90

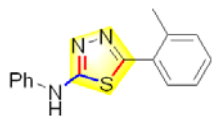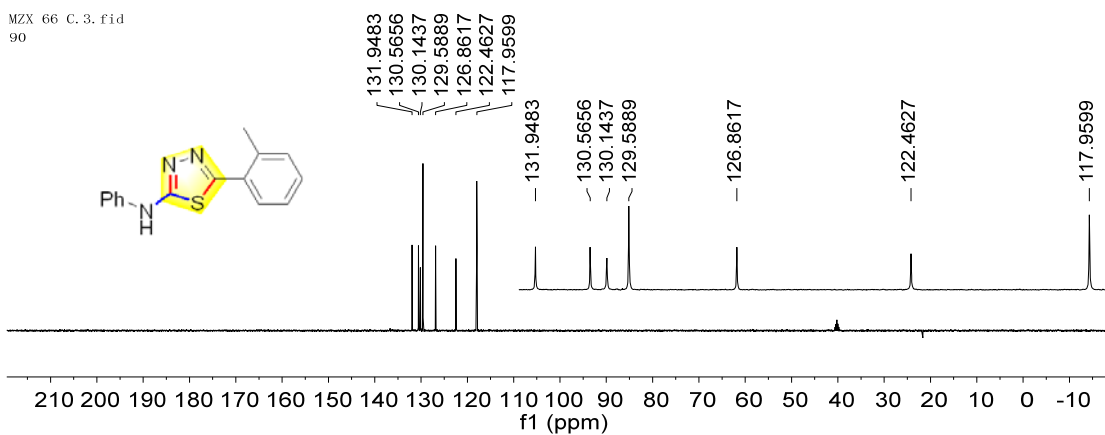

MZX 66 C. 4. fid  
135

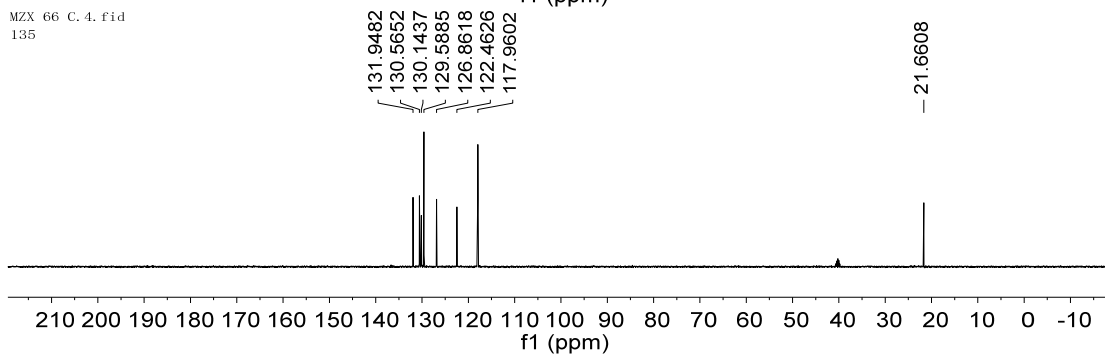

### 3q, <sup>1</sup>H NMR

MZX 48.10.fid

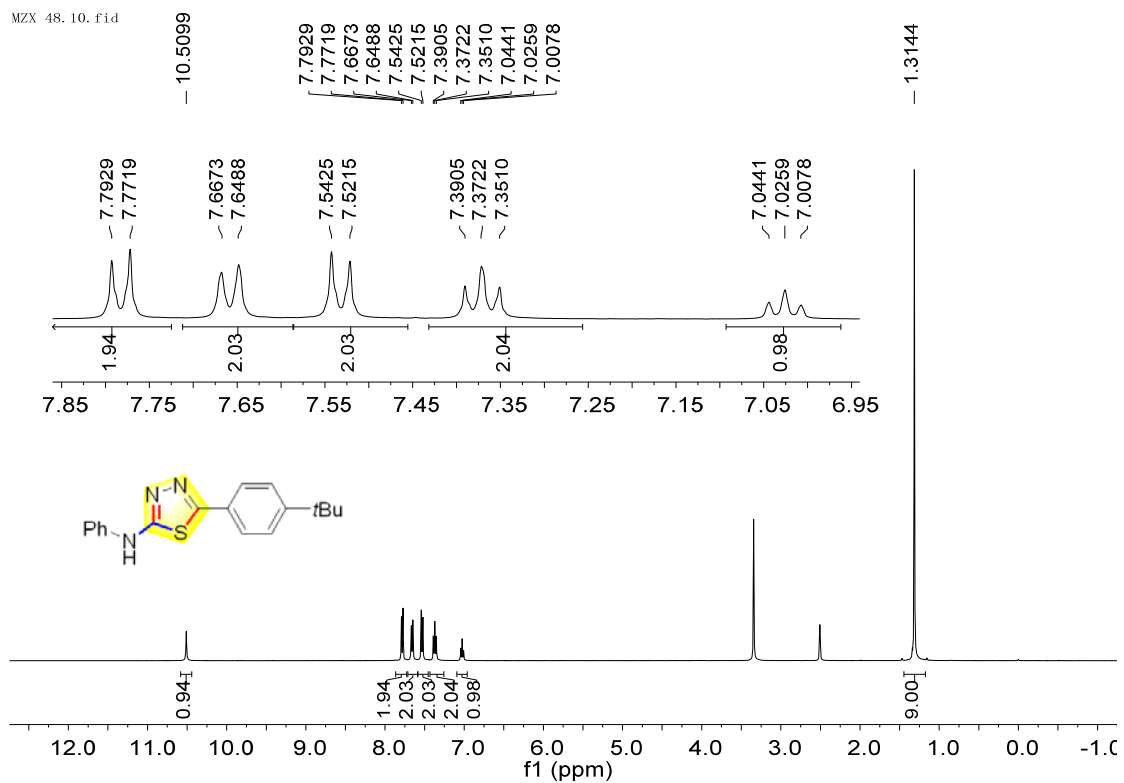

### <sup>13</sup>C NMR

MZX 48 C.11.fid

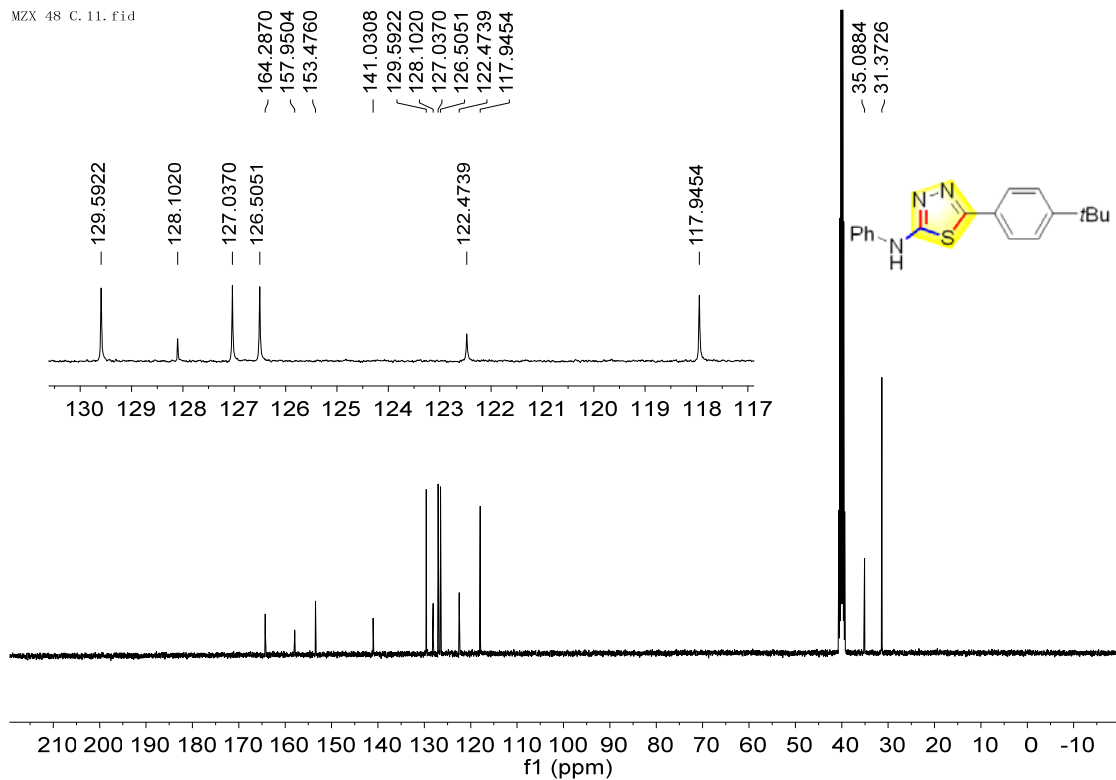

# DEPT 90 and DEPT 135

MZX 48 C. 12. fid  
90

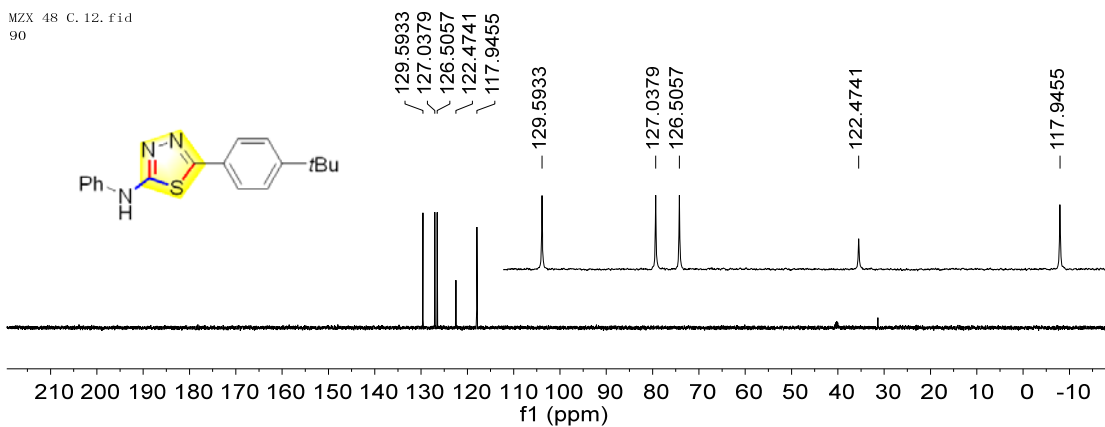

MZX 48 C. 13. fid  
135

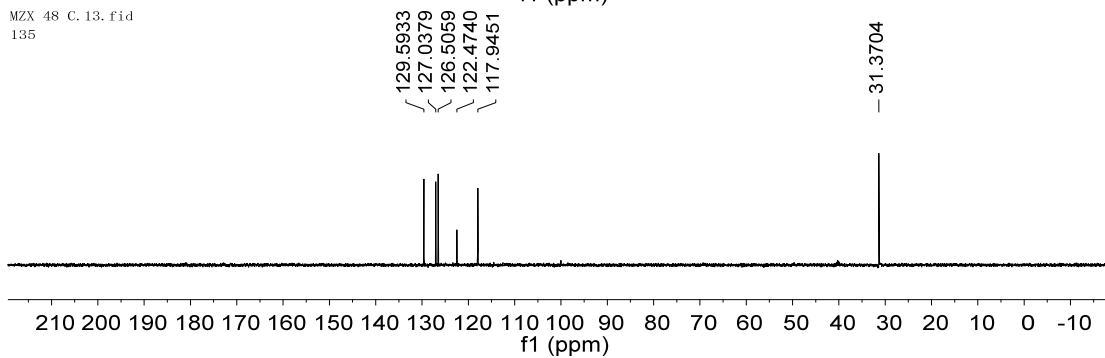

### 3r, <sup>1</sup>H NMR

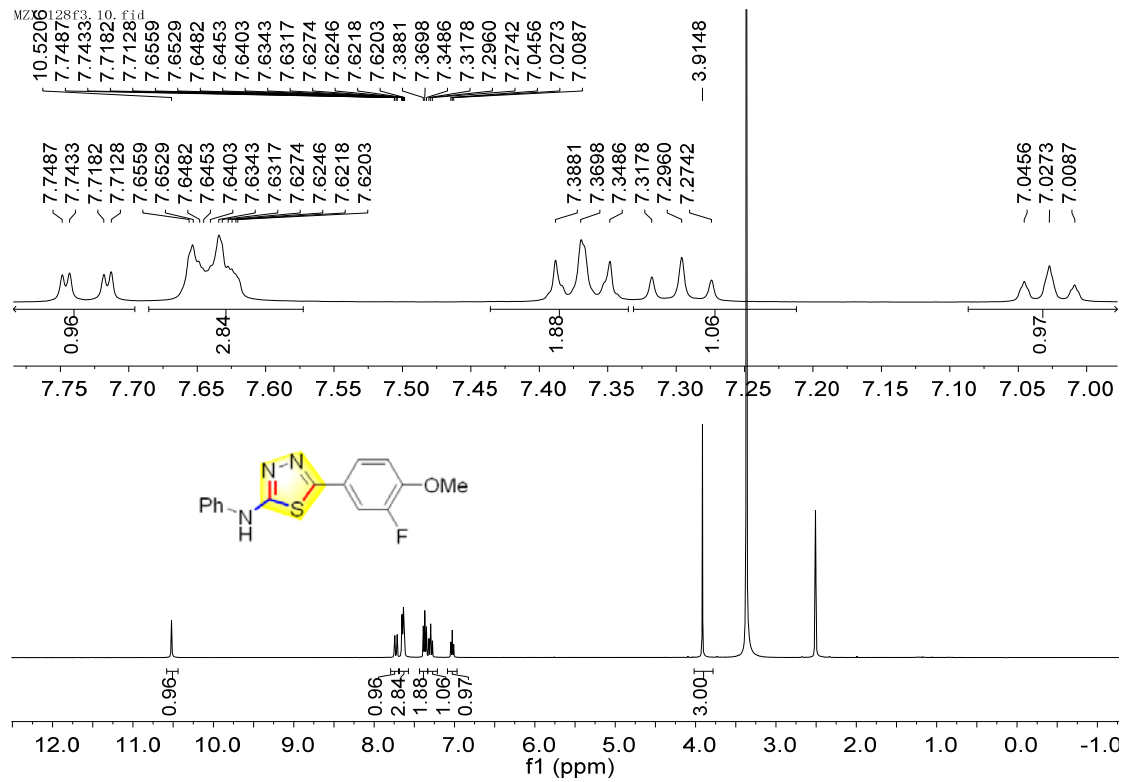

### <sup>13</sup>C NMR

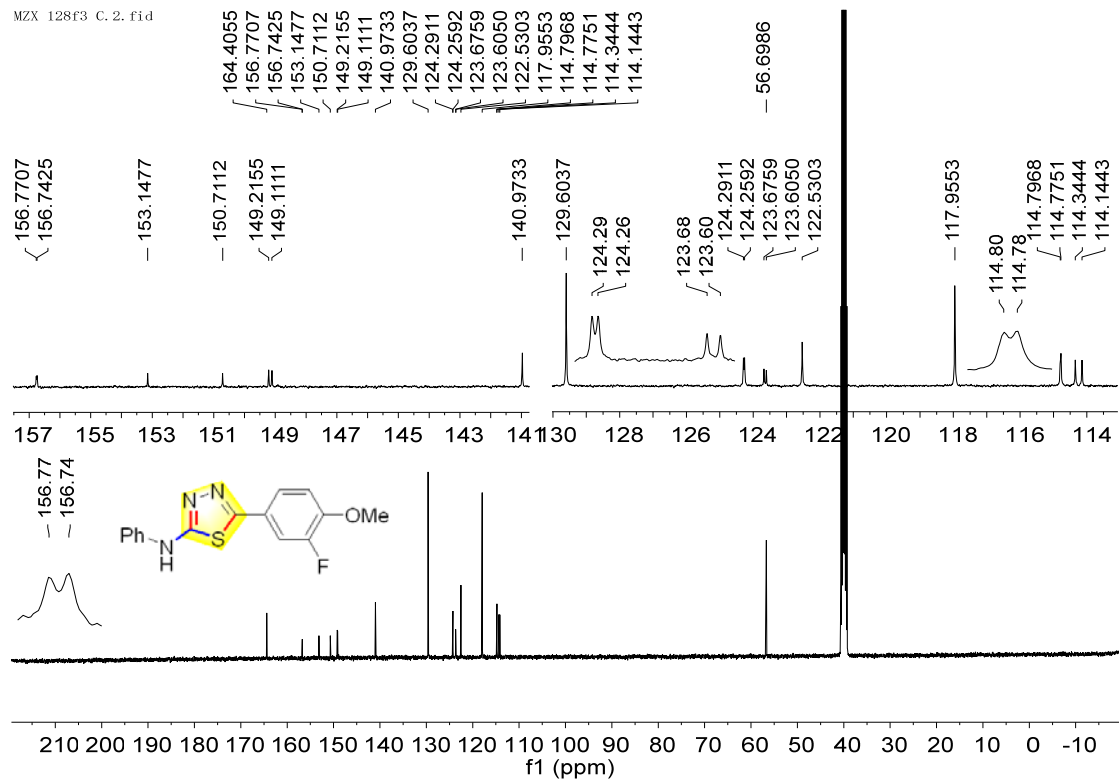

### DEPT 90 and DEPT 135

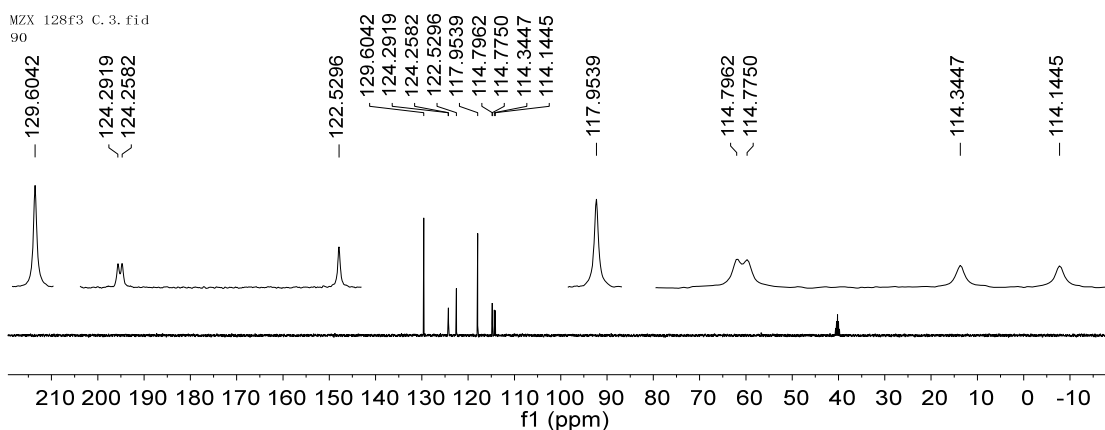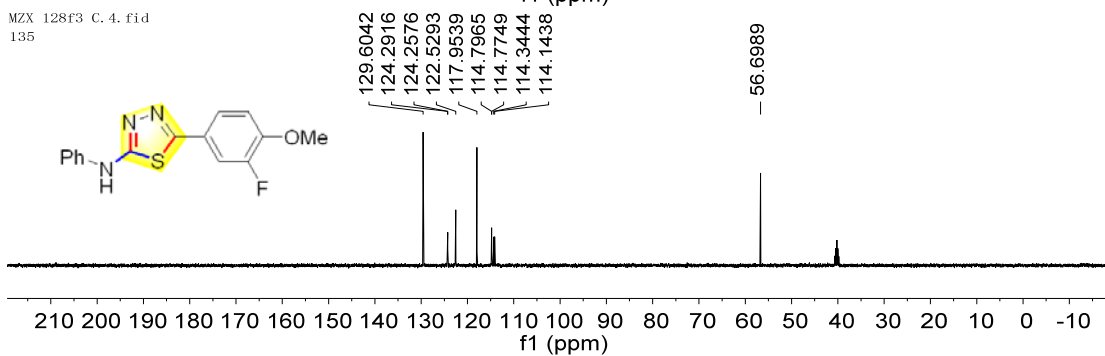

### <sup>19</sup>F NMR

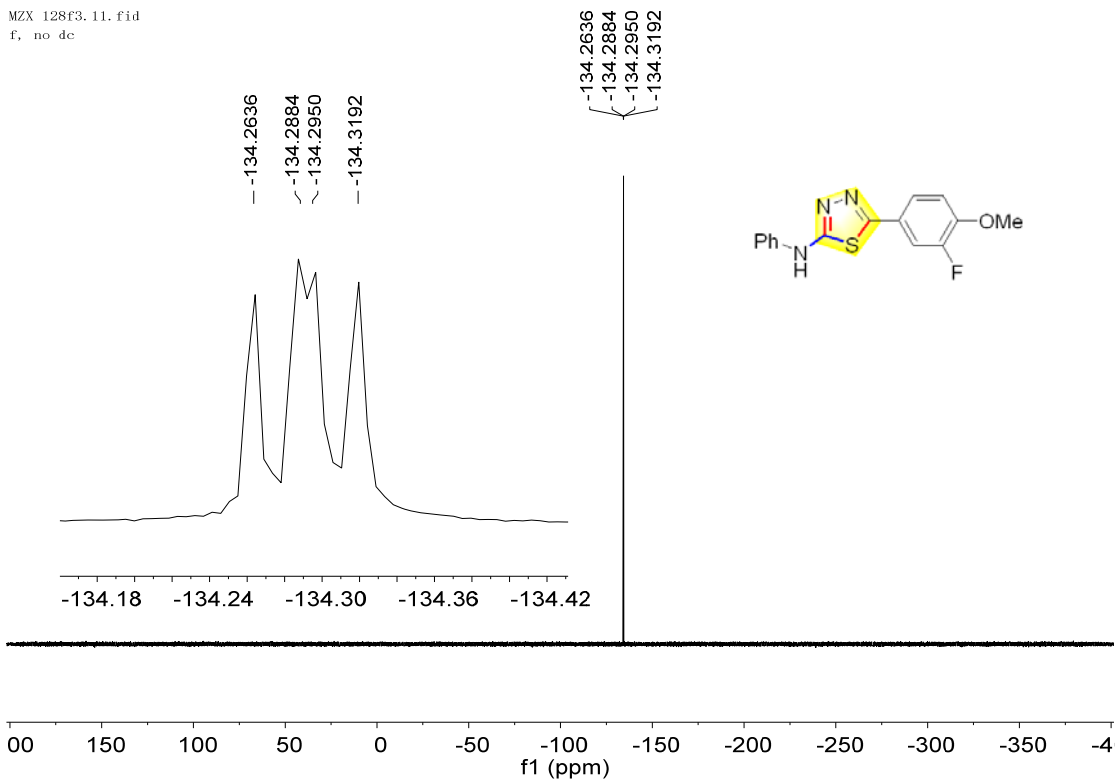

### 3s, <sup>1</sup>H NMR

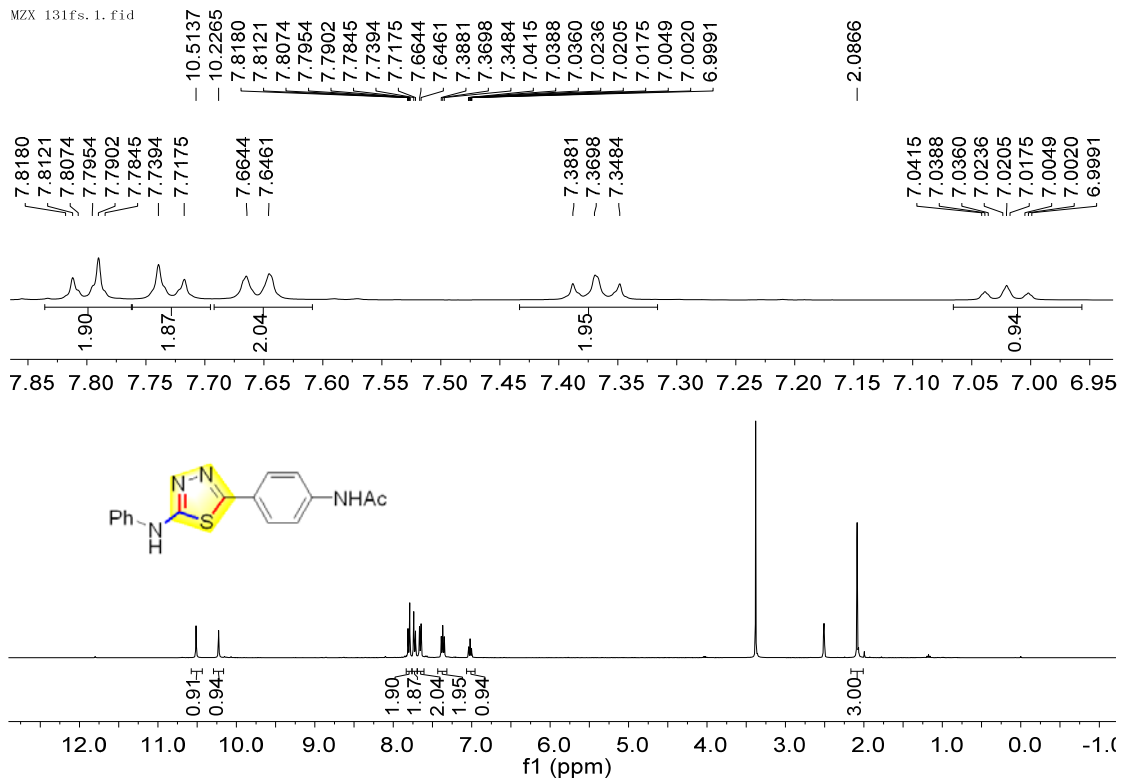

### <sup>13</sup>C NMR

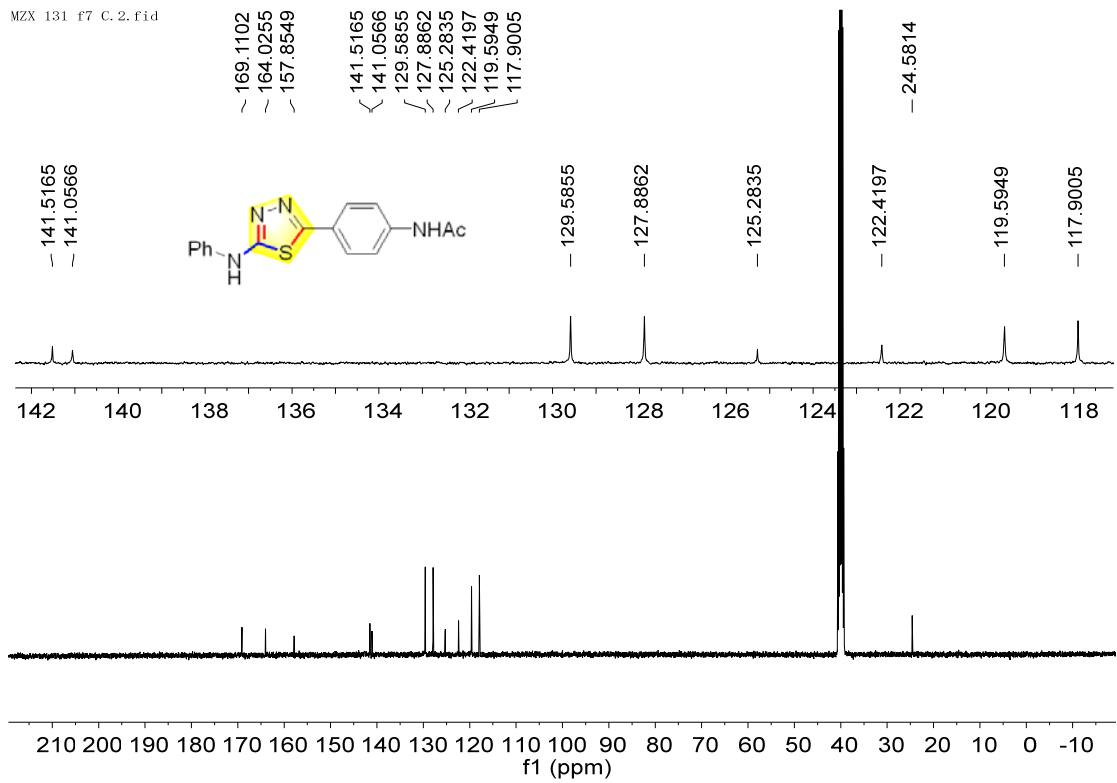



# DEPT 90 and DEPT 135

MZX 131 f7 C. 3. fid  
90

129.5853  
127.8862  
122.4180  
119.5932  
117.8981

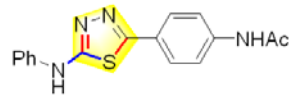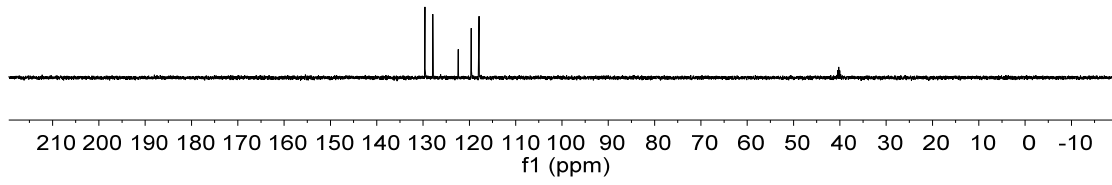

MZX 131fs C. 4. fid  
135

129.5945  
127.8941  
122.4084  
119.5698  
117.8726

-24.5887

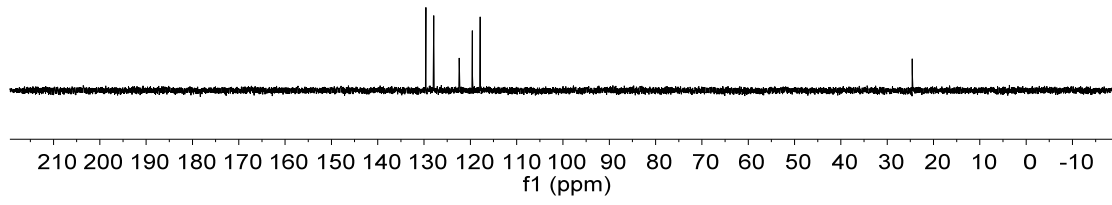

### 3t, <sup>1</sup>H NMR

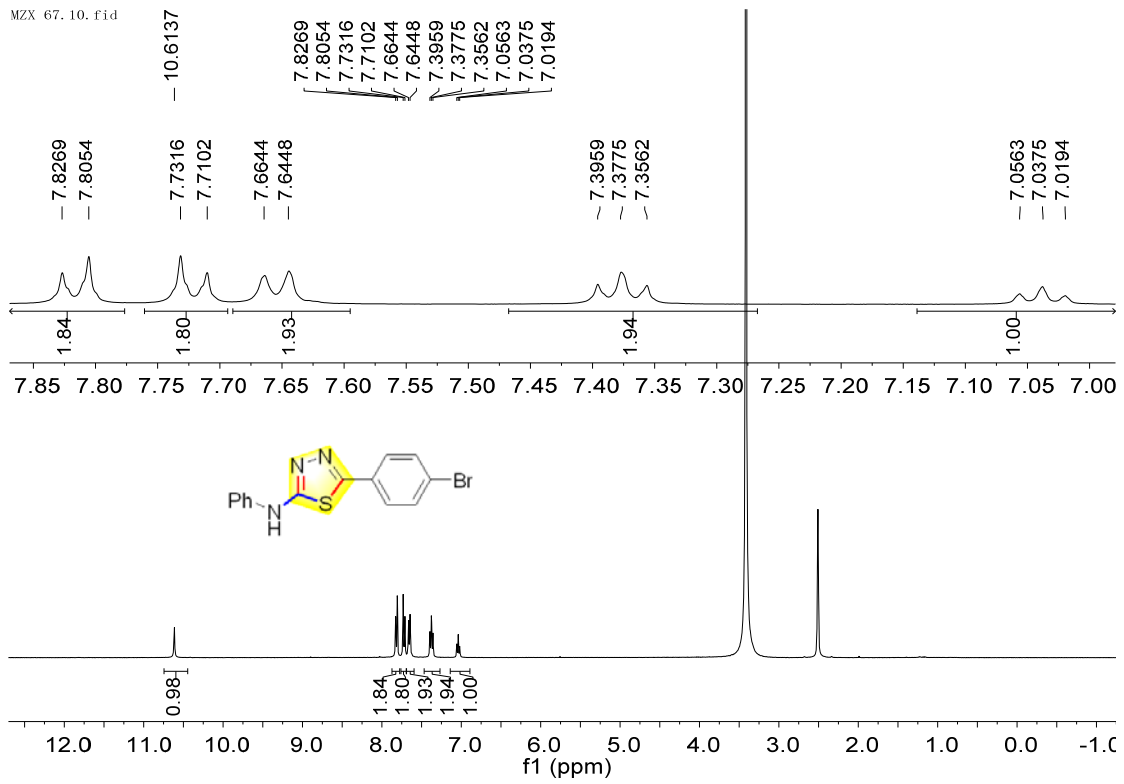

### <sup>13</sup>C NMR

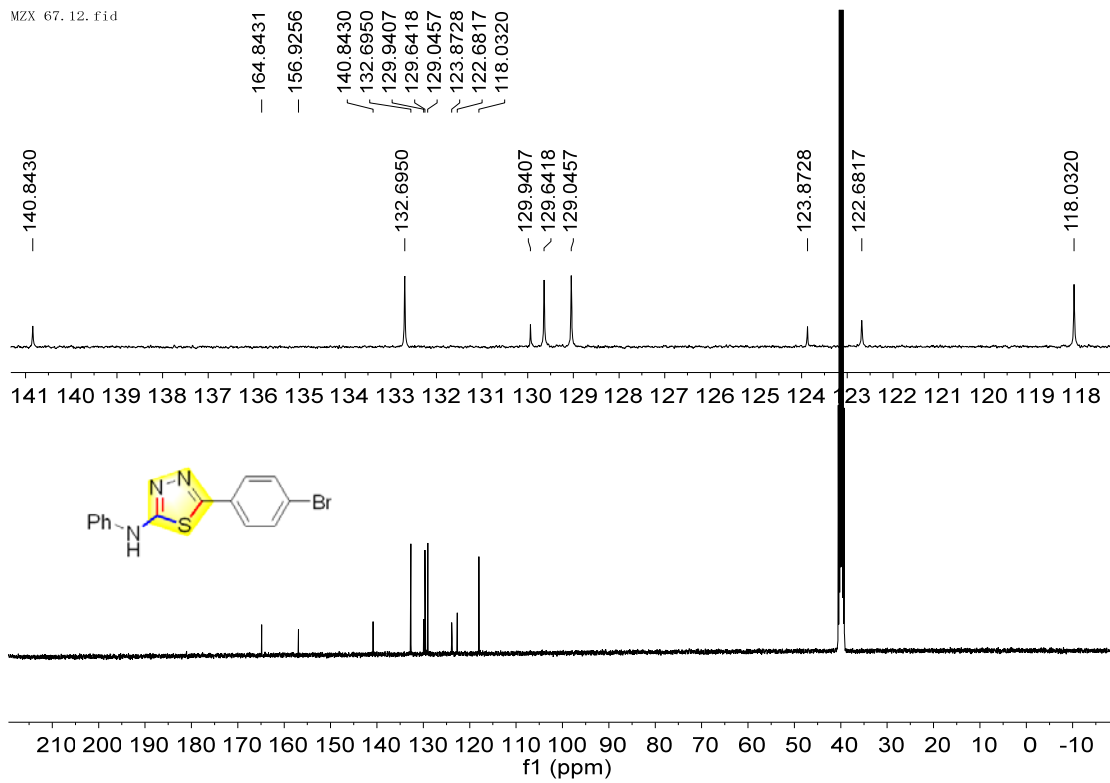

# DEPT 90 and DEPT 135

MZX 67.13.fid  
90

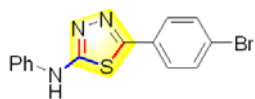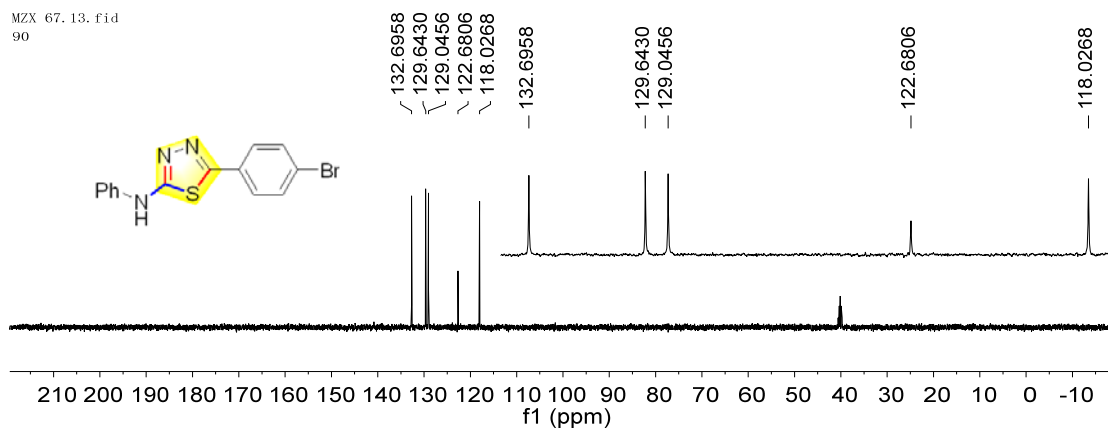

MZX 67.14.fid  
135

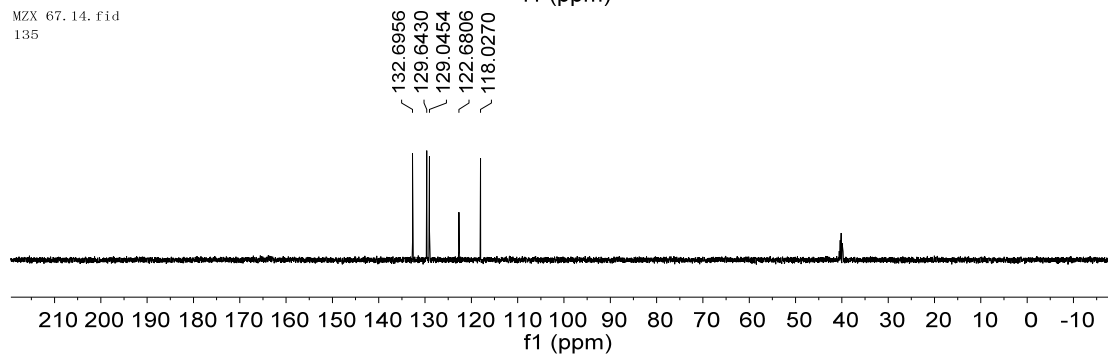

### 3u, <sup>1</sup>H NMR

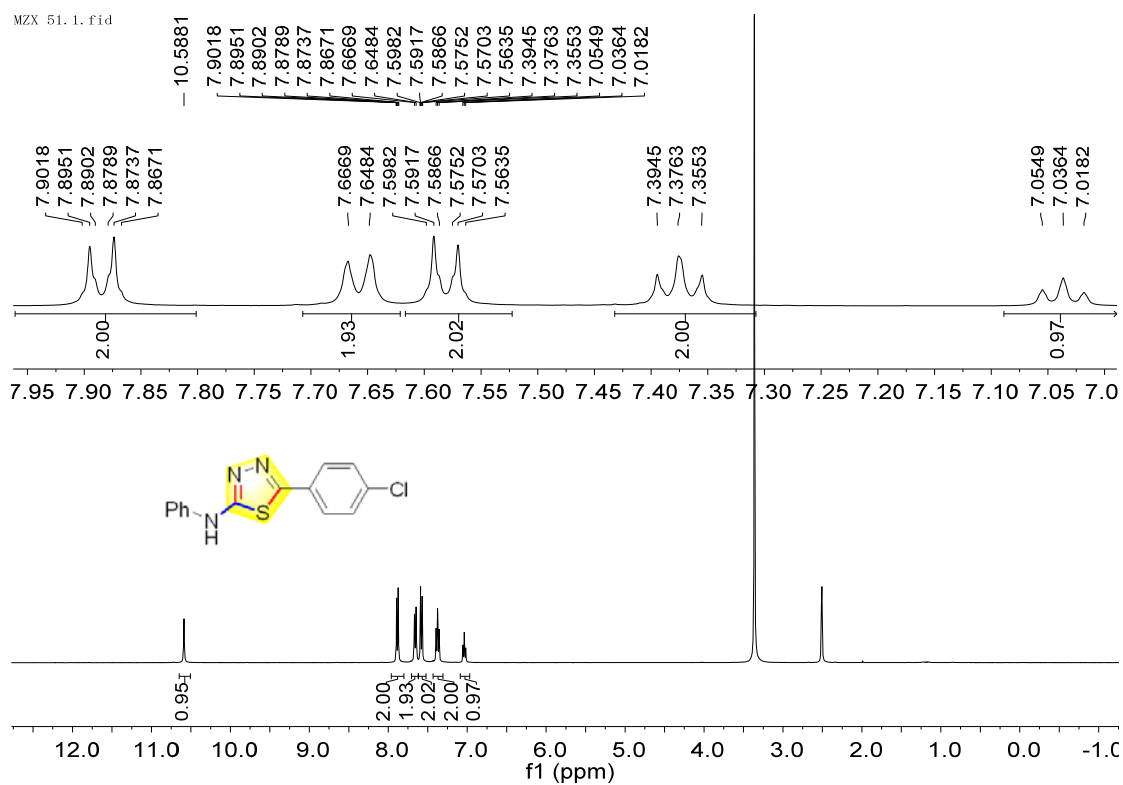

### <sup>13</sup>C NMR

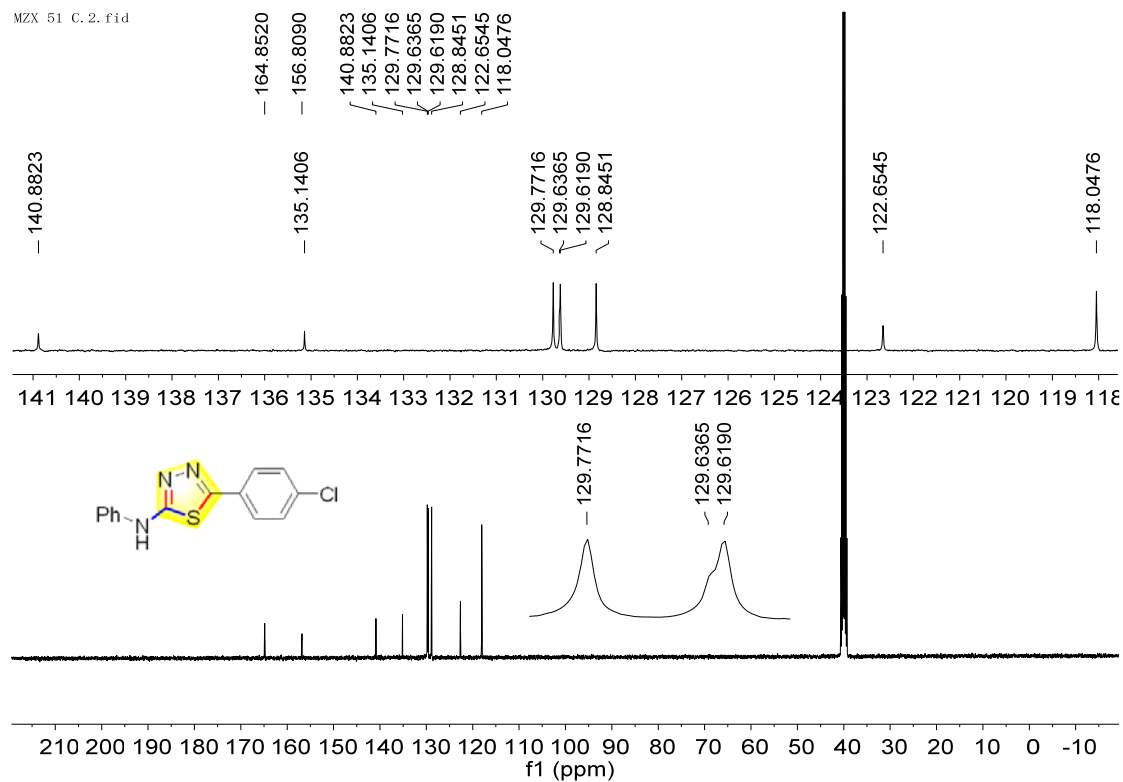

# DEPT 90 and DEPT 135

MZX 51 C. 3. fid  
90

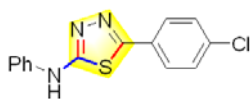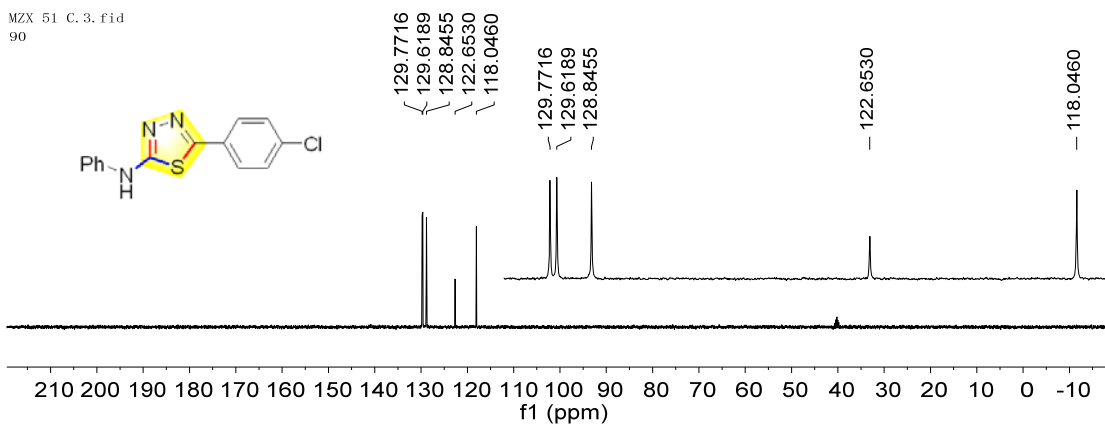

MZX 51 C. 4. fid  
135

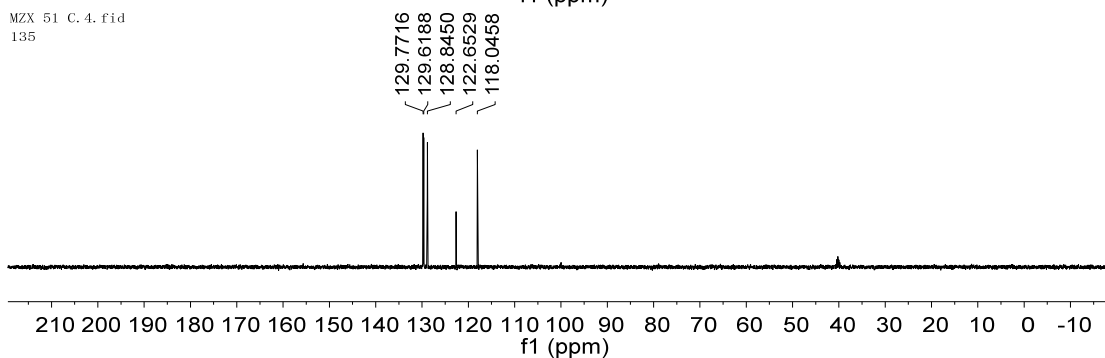

### 3v, <sup>1</sup>H NMR

MZX 69.1. fid

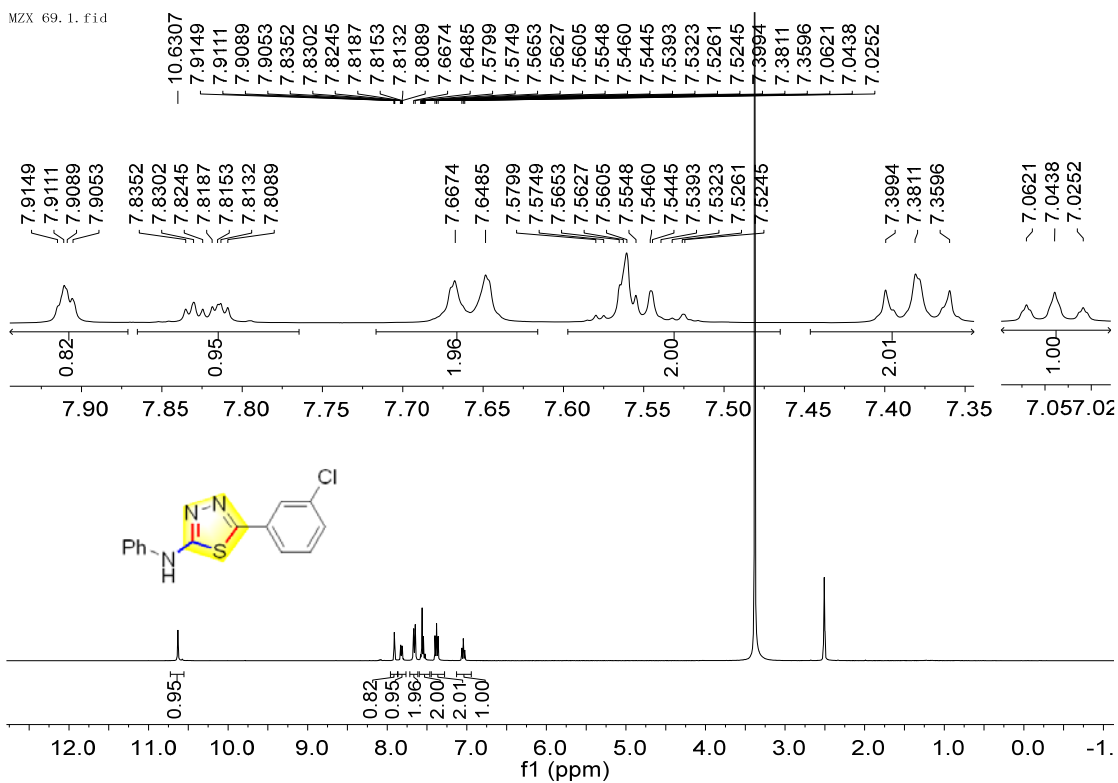

### <sup>13</sup>C NMR

MZX 69 C.35. fid

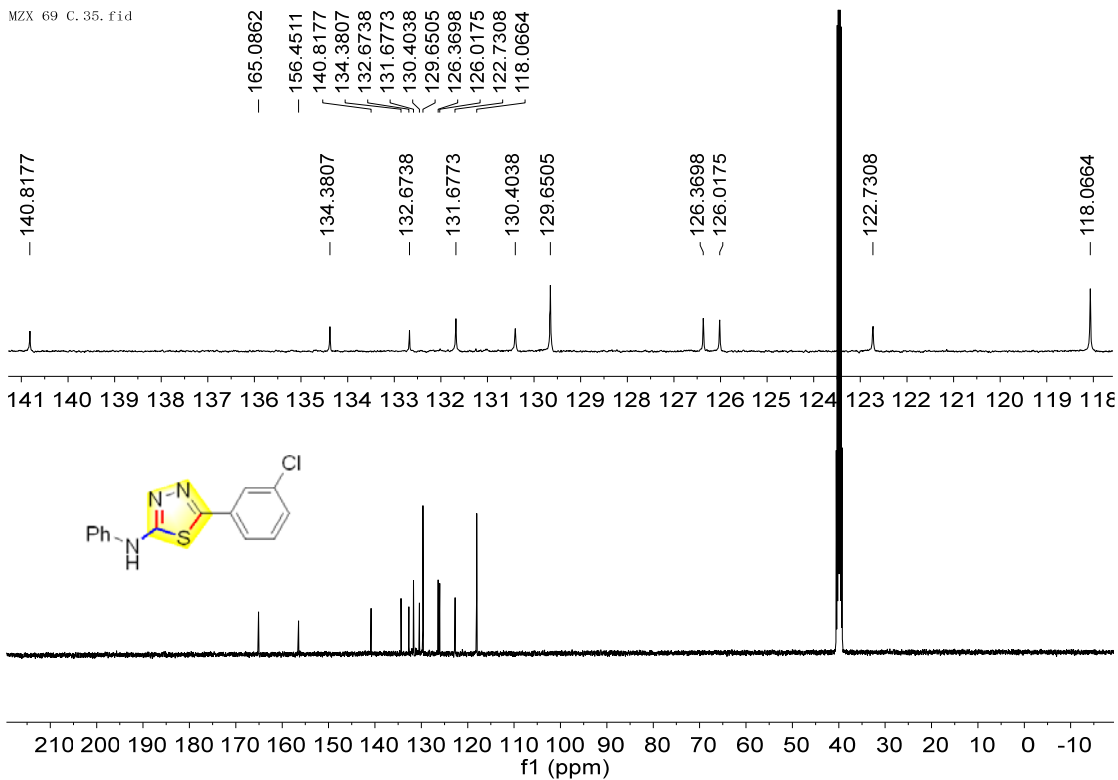

# DEPT 90 and DEPT 135

MZX 69 C. 36. fid  
90

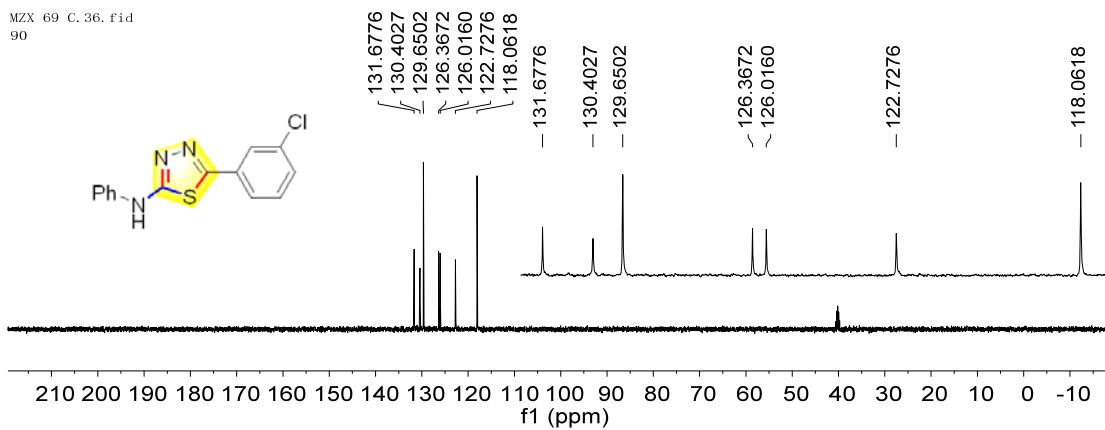

MZX 69 C. 37. fid  
135

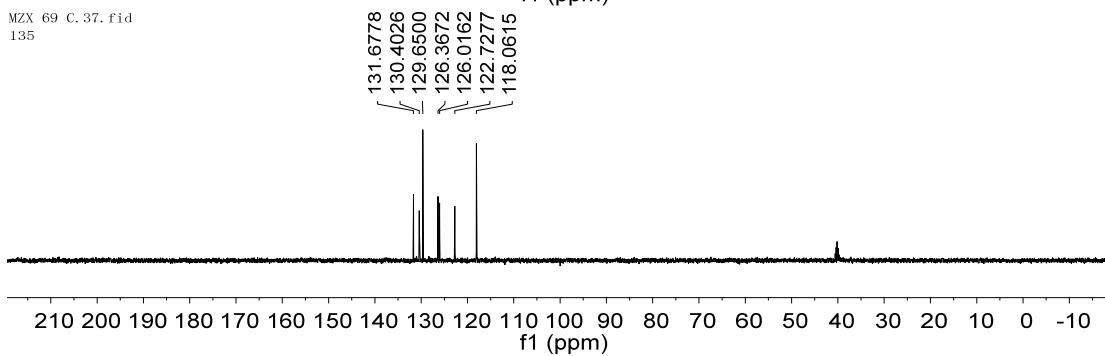

### 3w, <sup>1</sup>H NMR

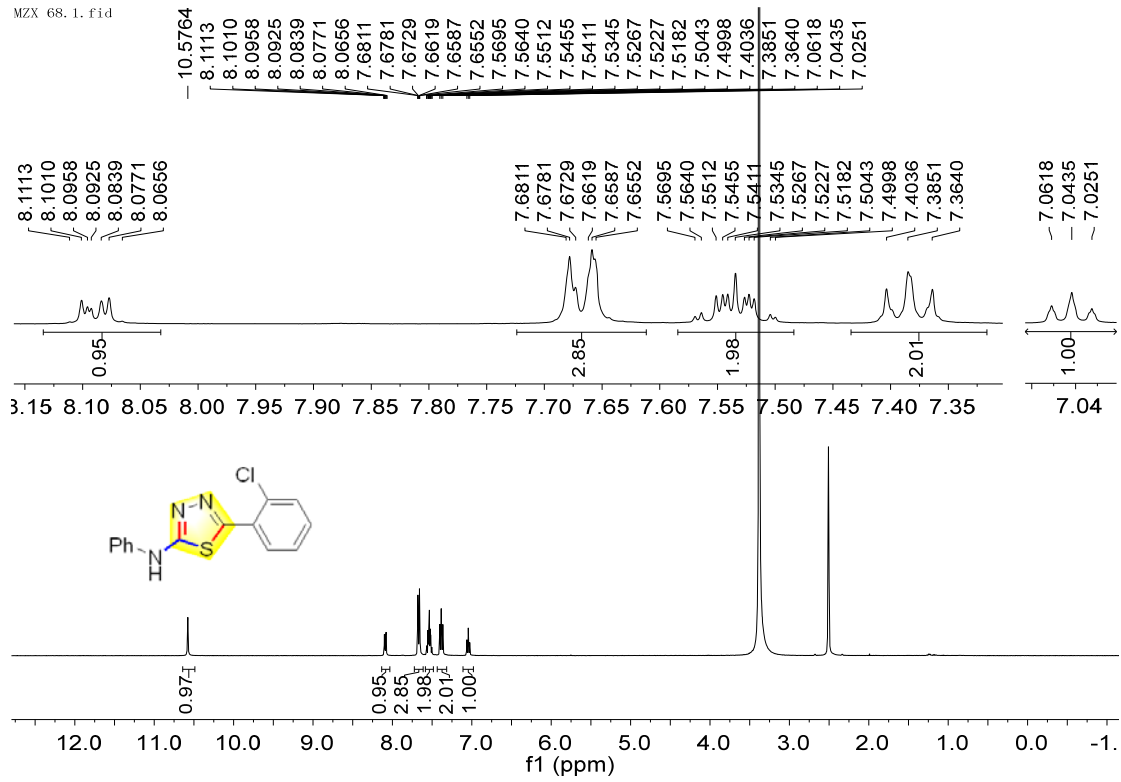

### <sup>13</sup>C NMR

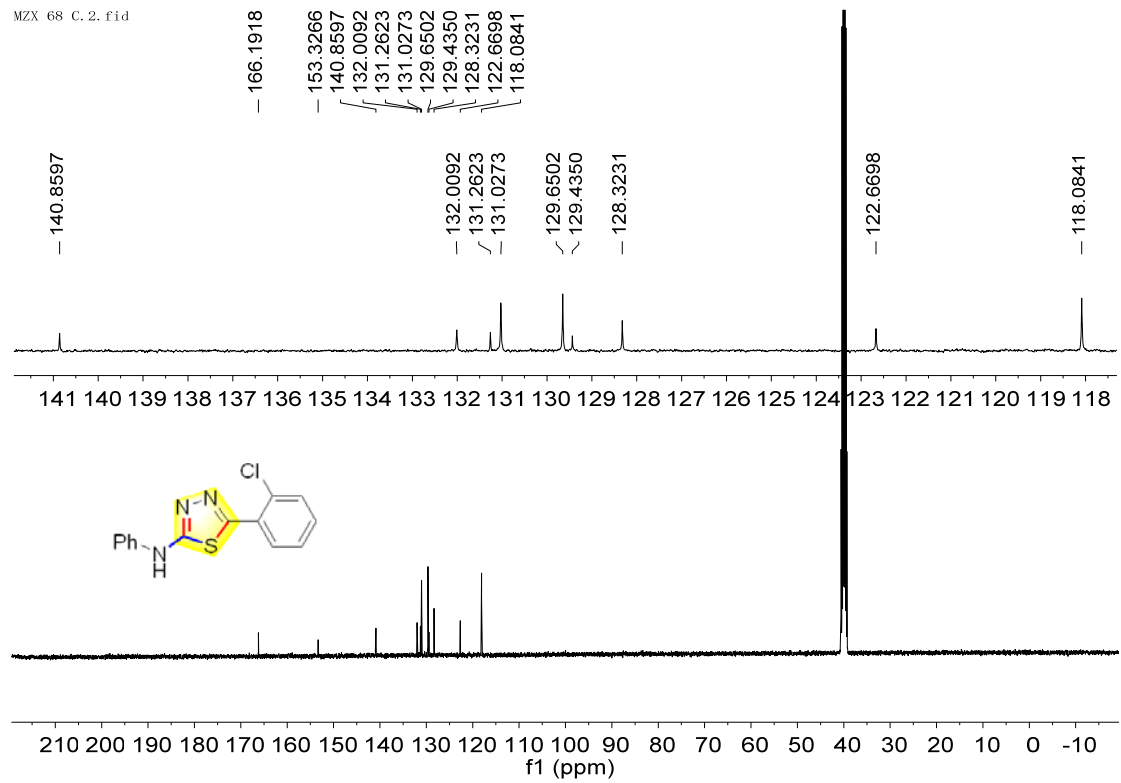



# DEPT 90 and DEPT 135

MZX 68 C. 30. fid  
90

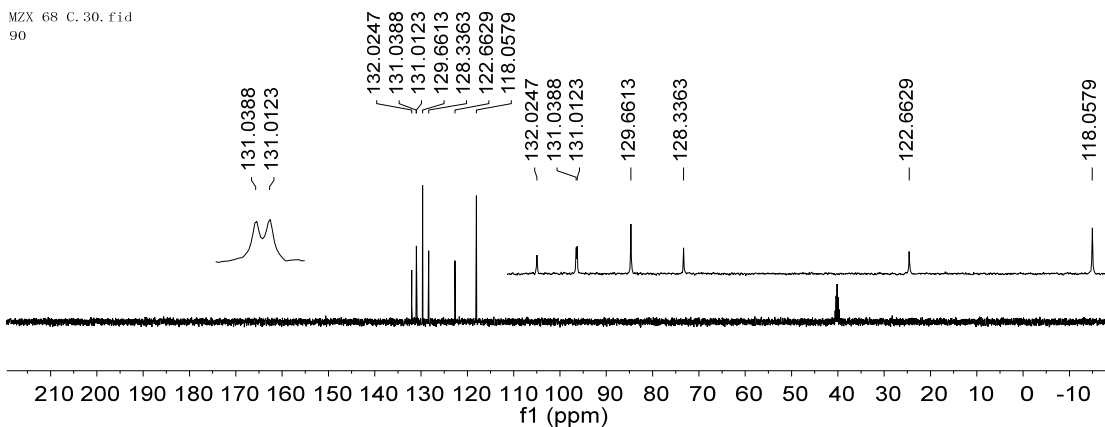

MZX 68 C. 31. fid  
135

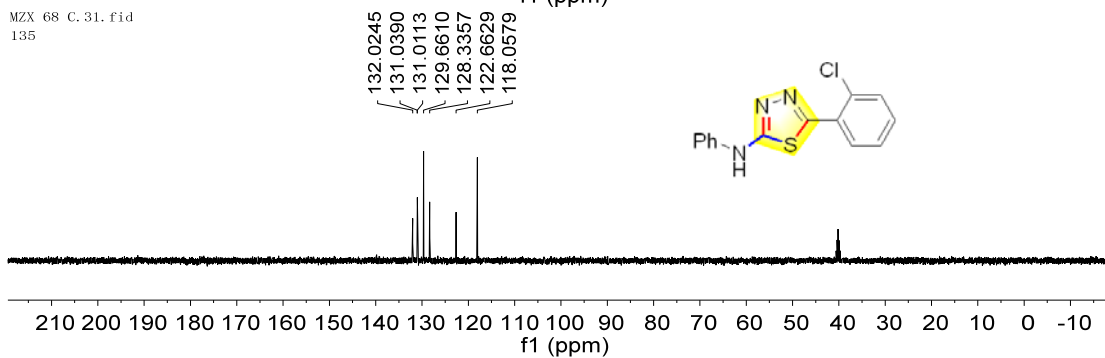

### 3x, <sup>1</sup>H NMR

MZX 43.10. fid

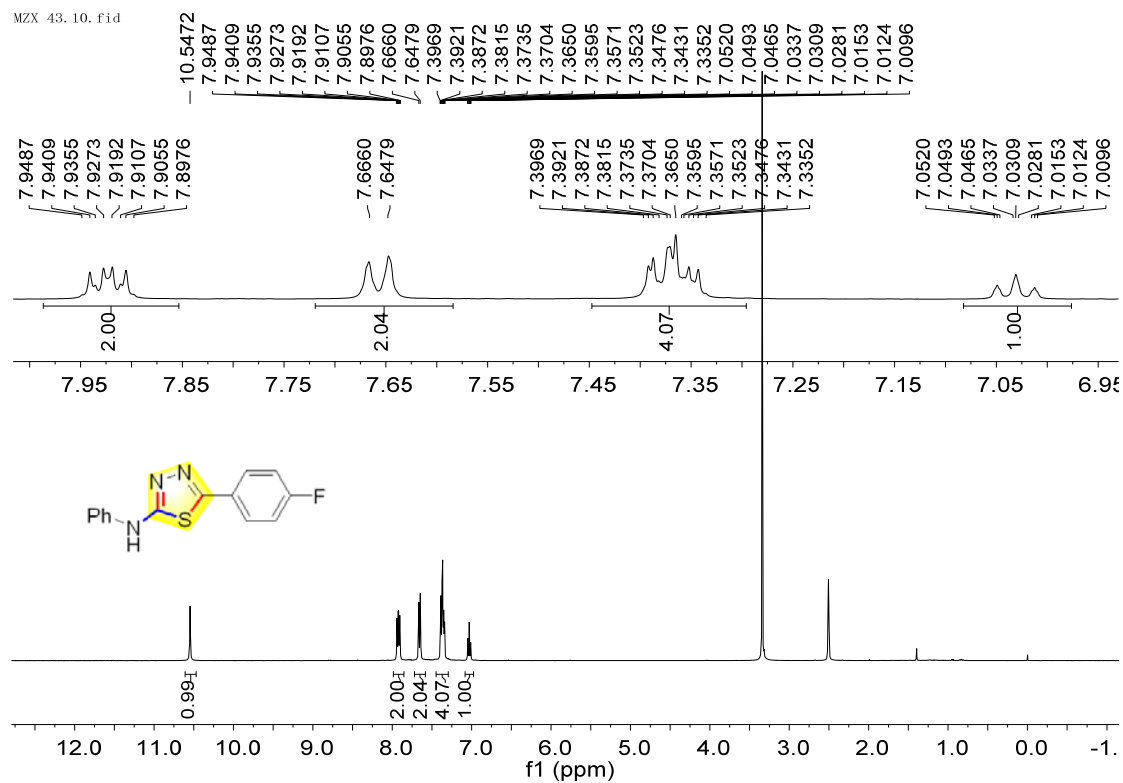

### <sup>13</sup>C NMR

MZX 43 C.11. fid

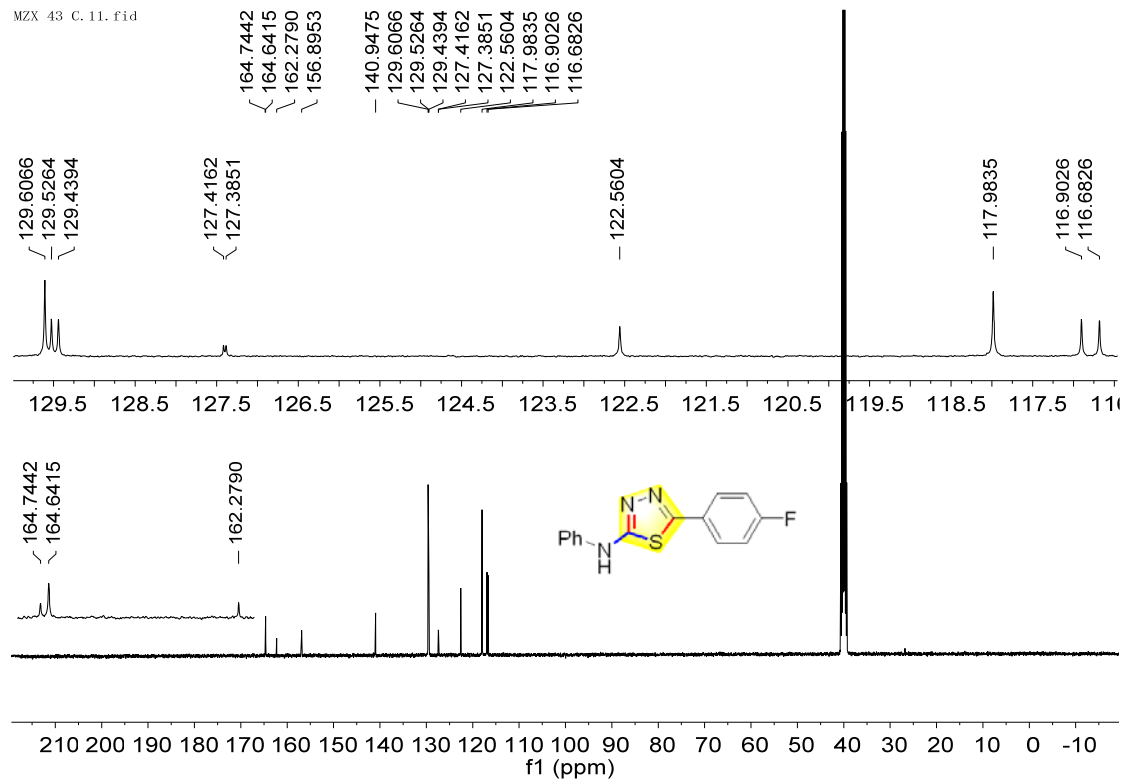

### DEPT 90 and DEPT 135

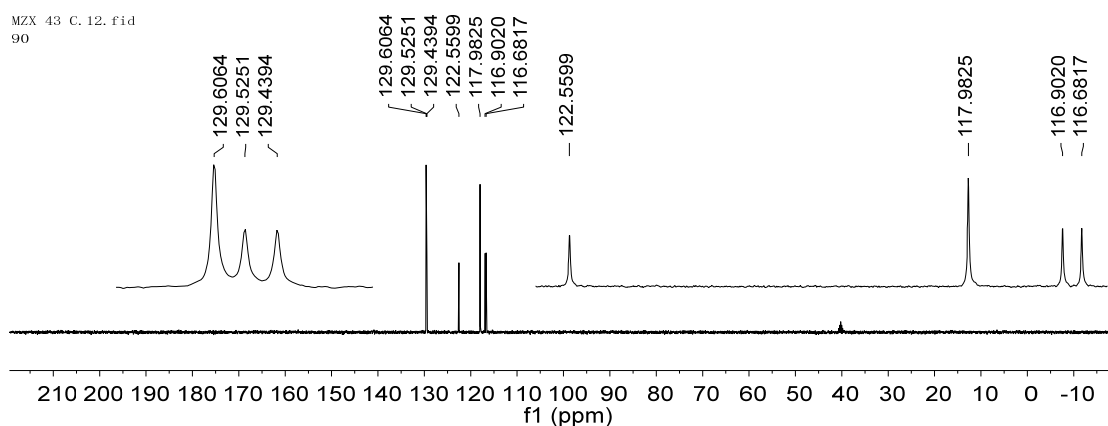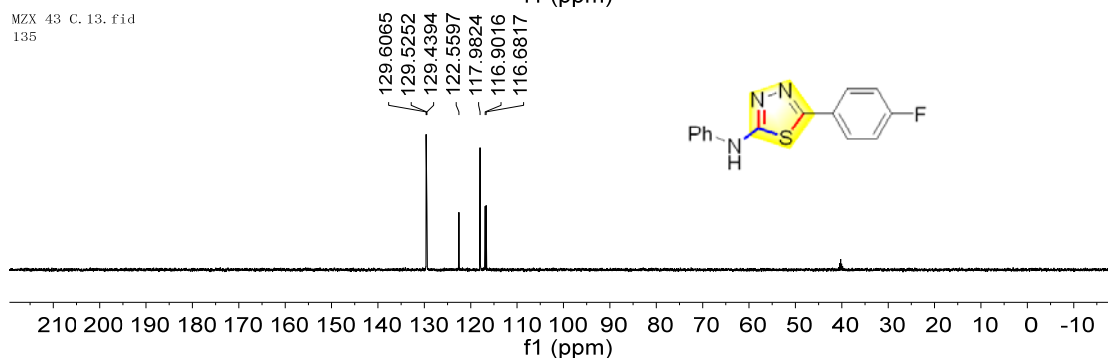

### <sup>19</sup>F NMR

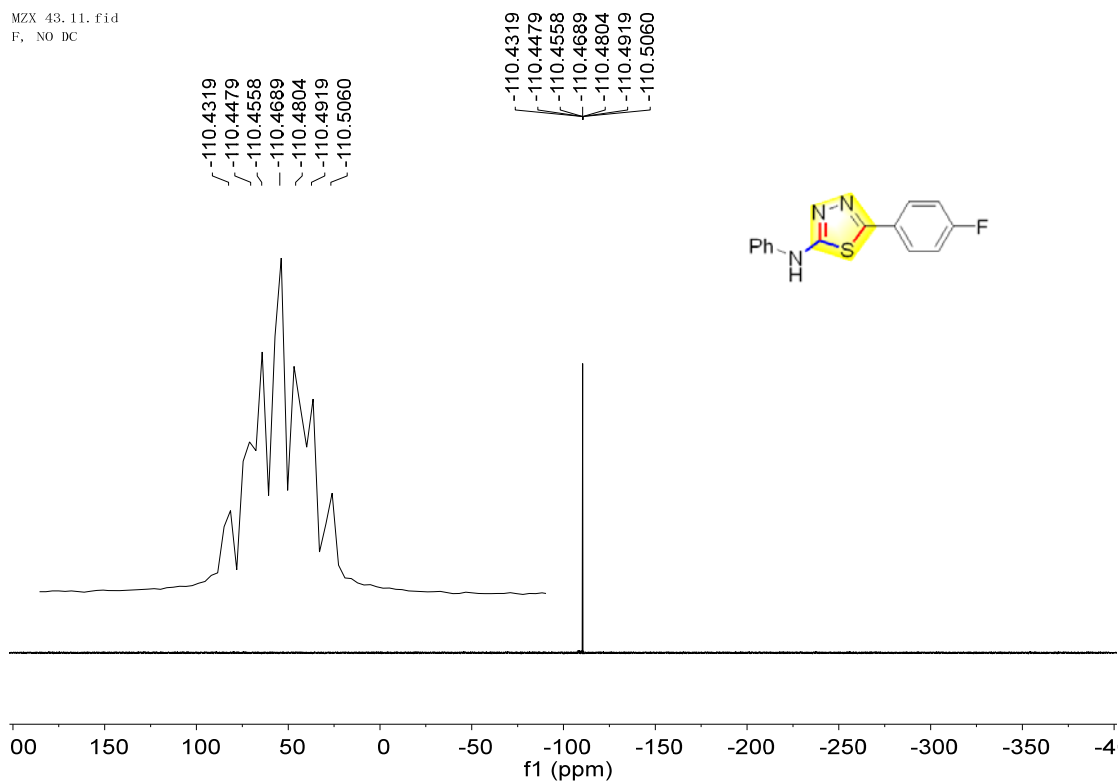

### 3y, <sup>1</sup>H NMR

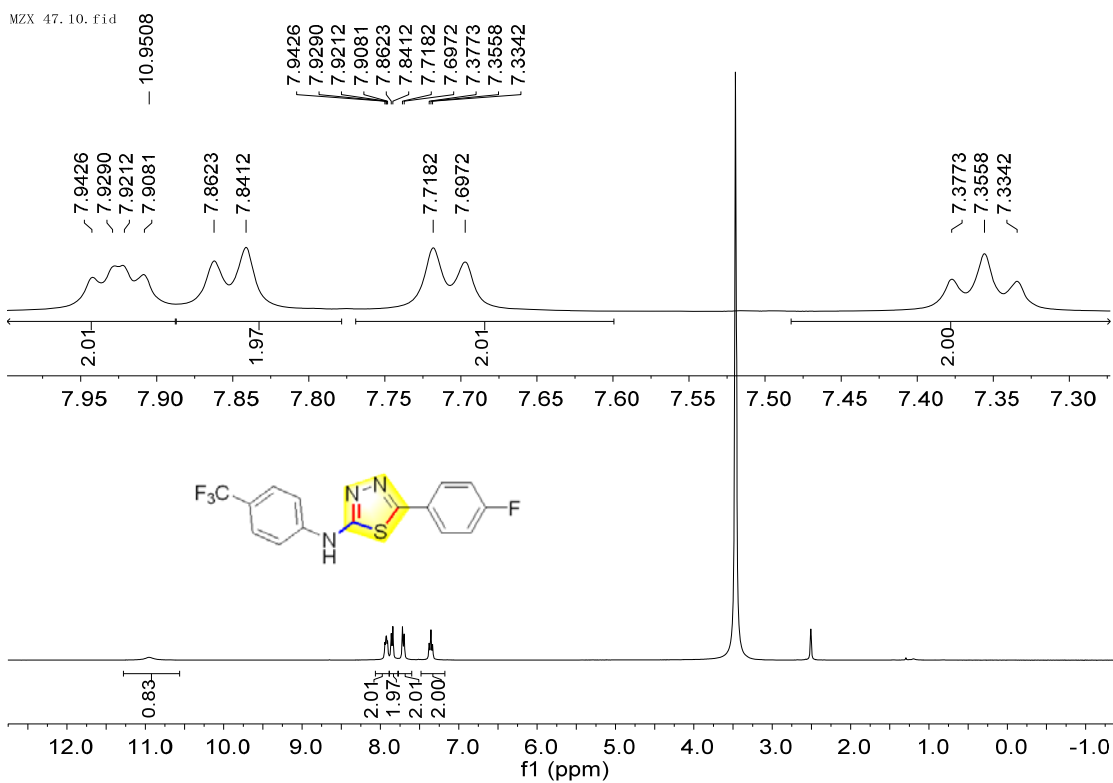

### <sup>13</sup>C NMR

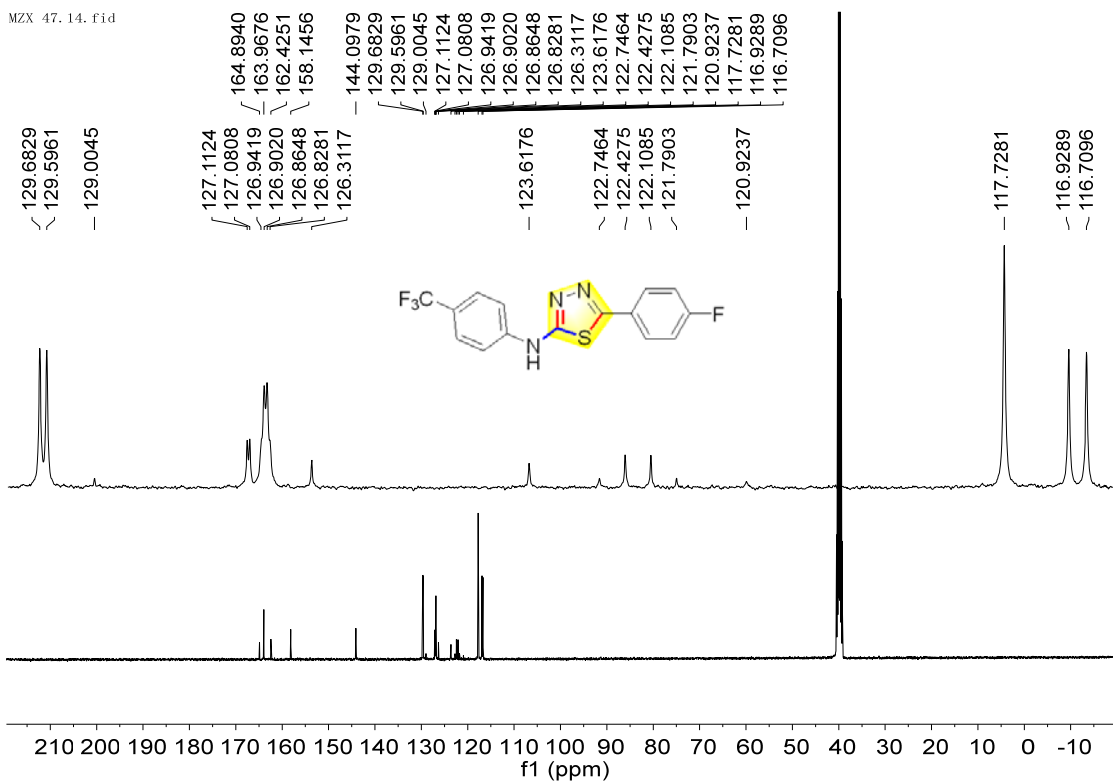

### DEPT 90 and DEPT 135

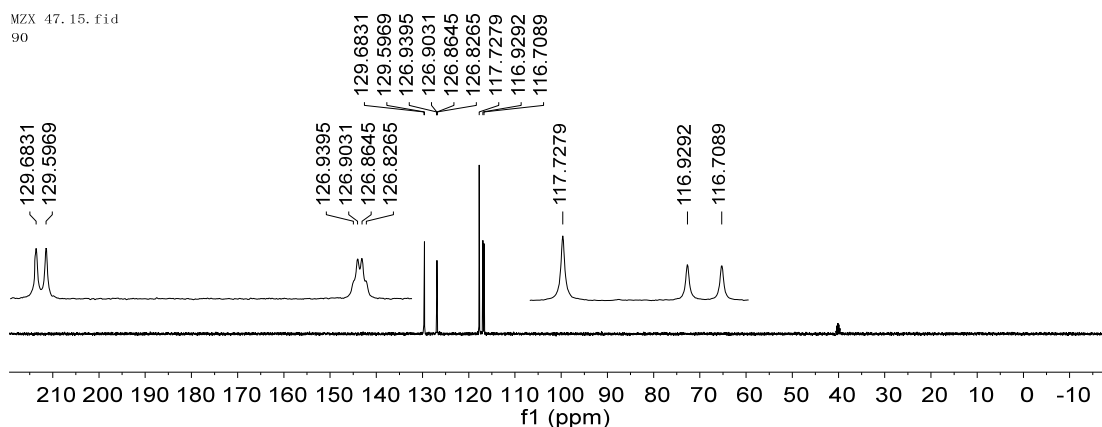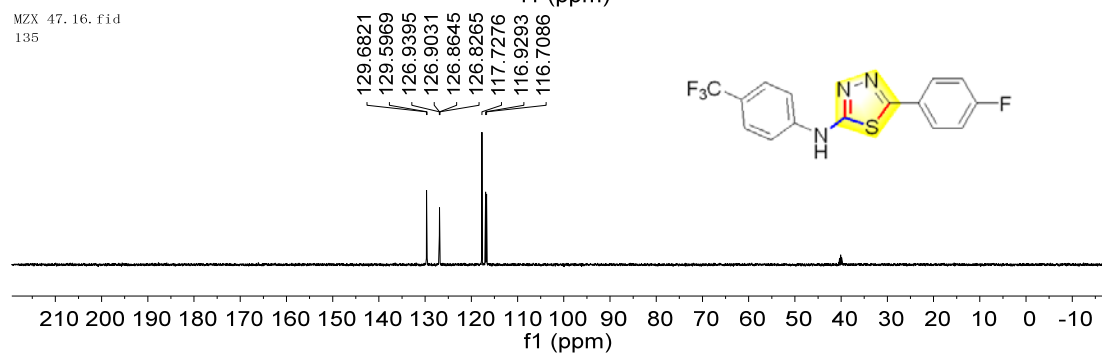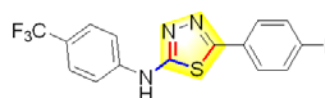

### <sup>19</sup>F NMR

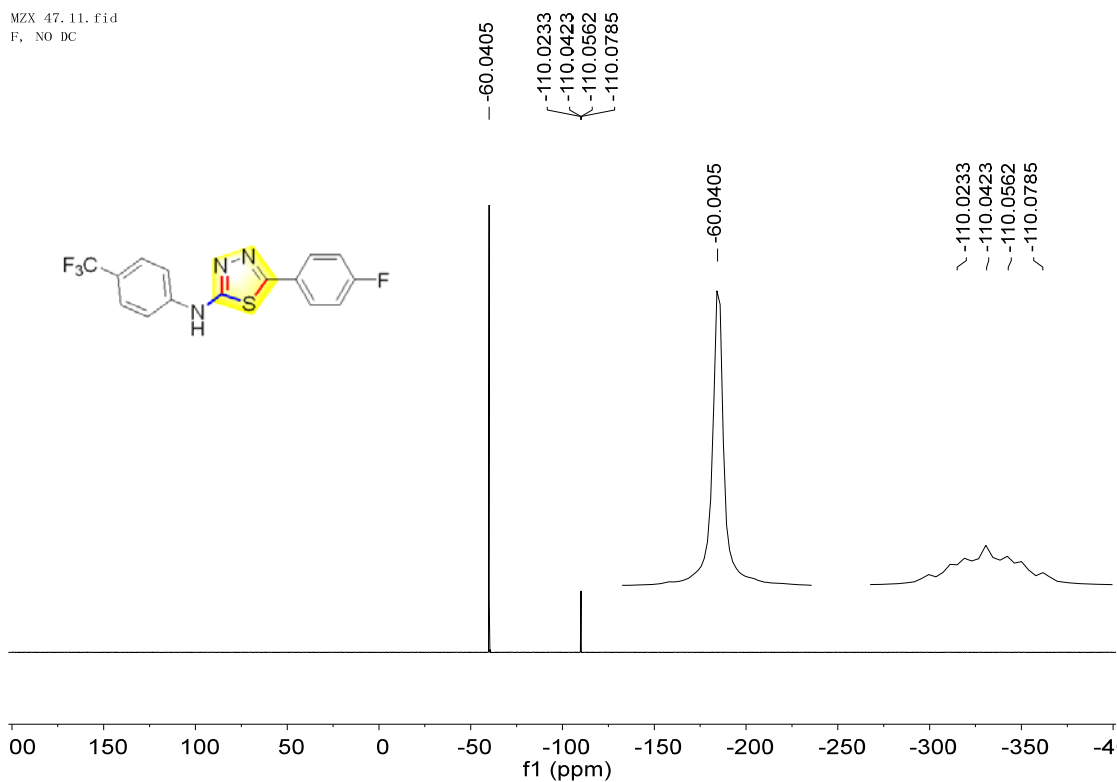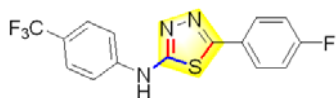

### 3z, <sup>1</sup>H NMR

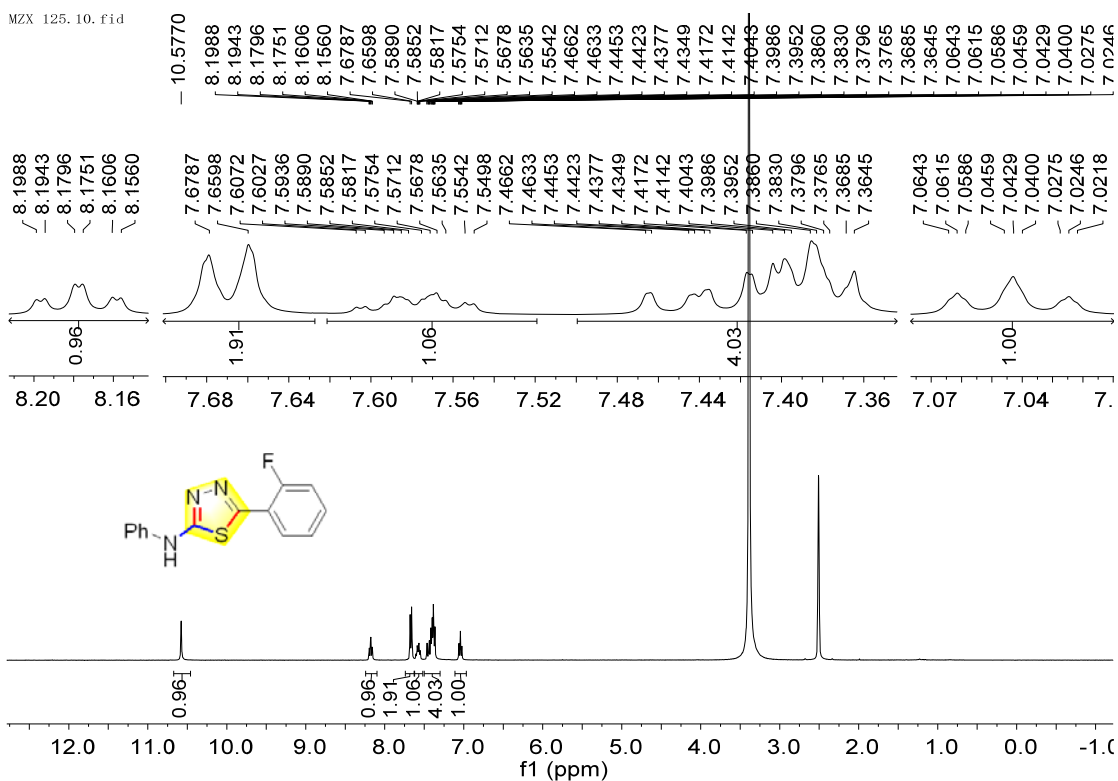

### <sup>13</sup>C NMR

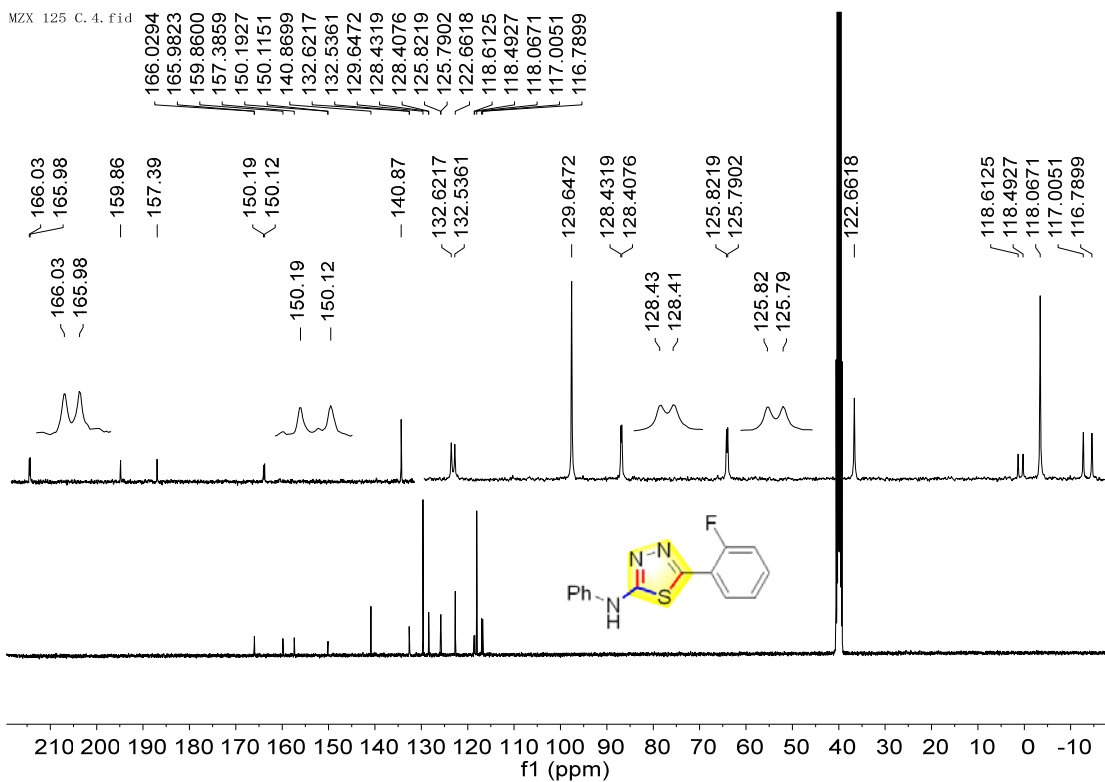

### DEPT 90 and DEPT 135

MZX 125 C. 5. fid  
90

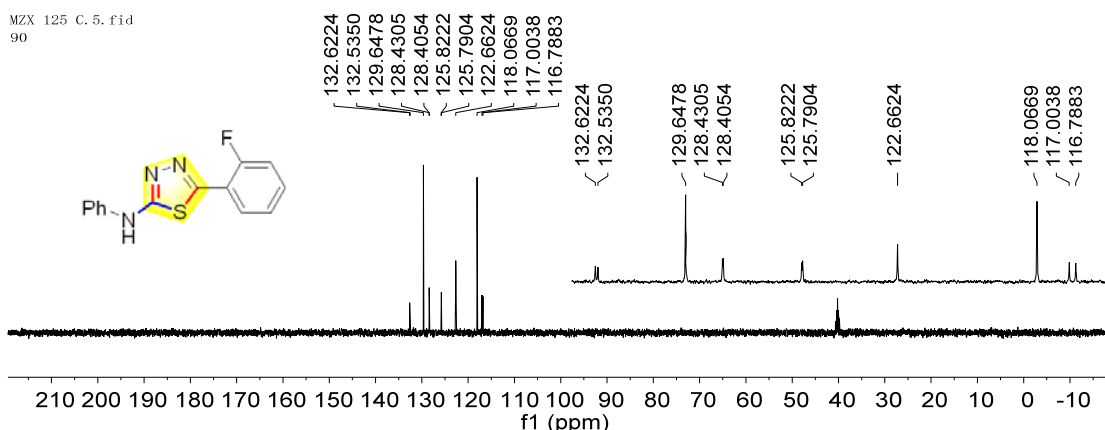

MZX 125 C. 6. fid  
135

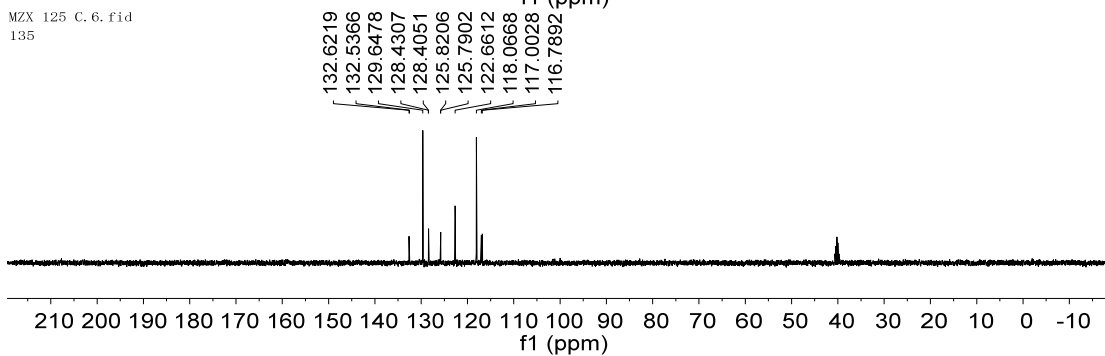

### <sup>19</sup>F NMR

MZX 125 C. 1. fid  
F, NO DC

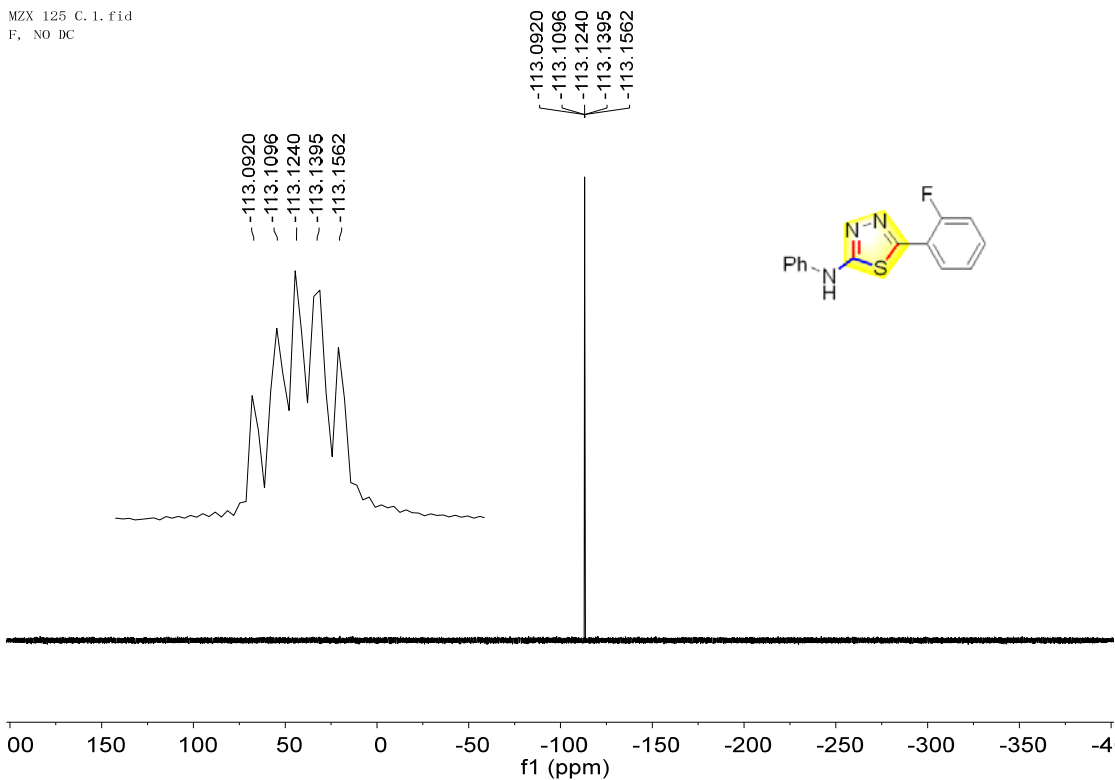

### 3aa, <sup>1</sup>H NMR

MZX 57. 10. fid

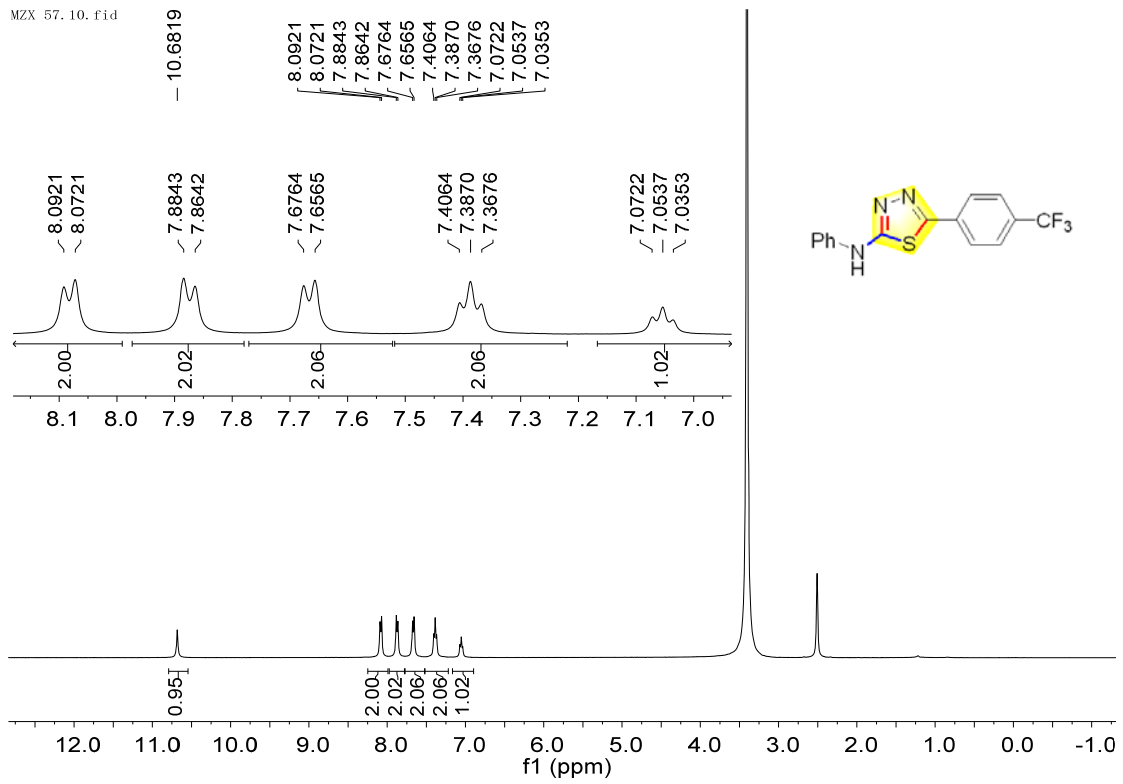

### <sup>13</sup>C NMR

MZX 57 C. 3. fid

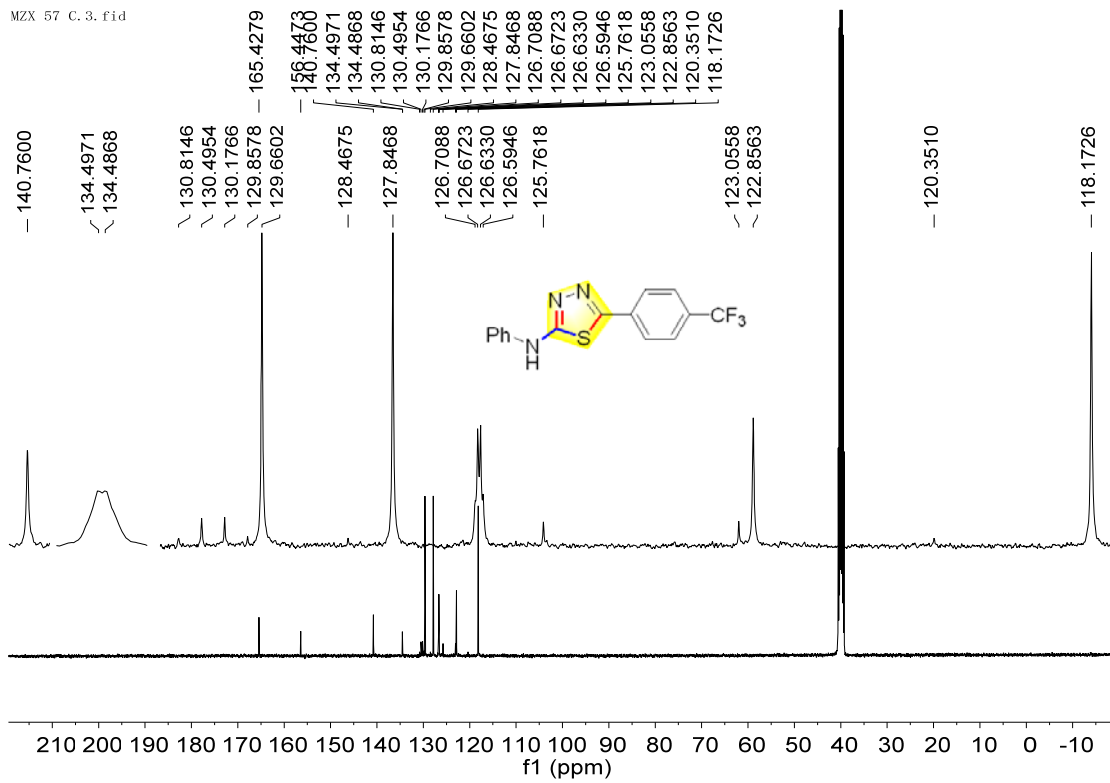



### DEPT 90 and DEPT 135

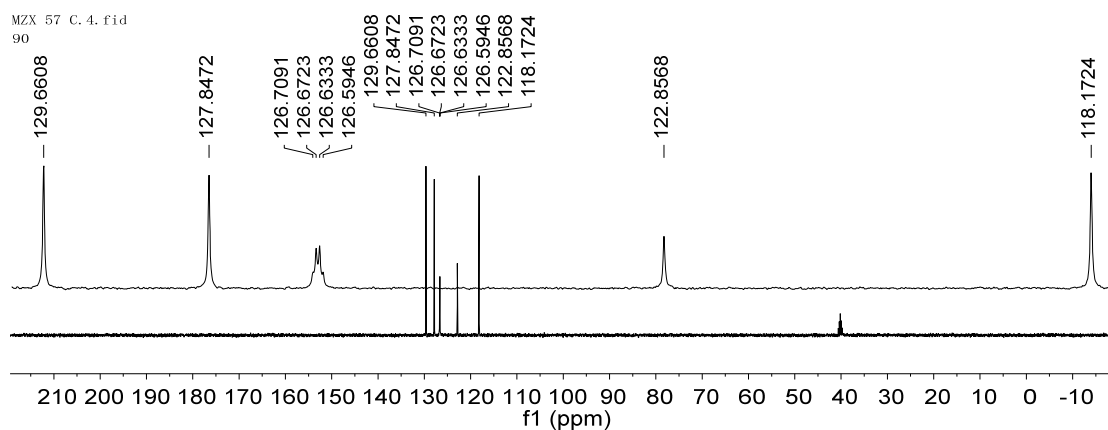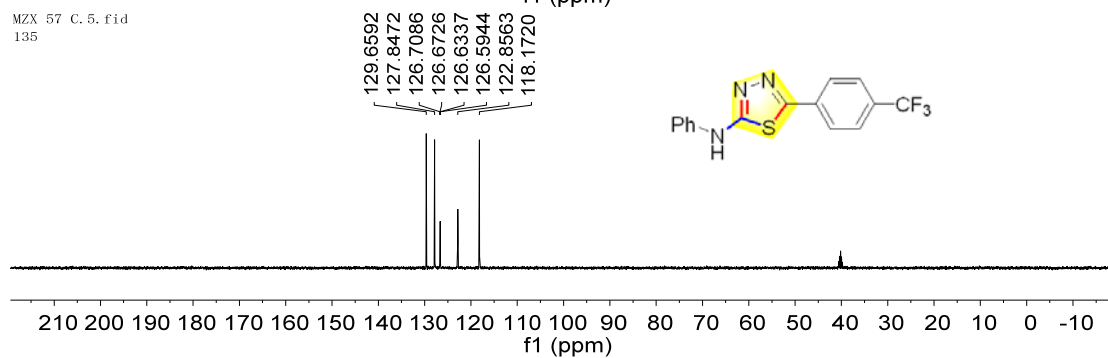

### <sup>19</sup>F NMR

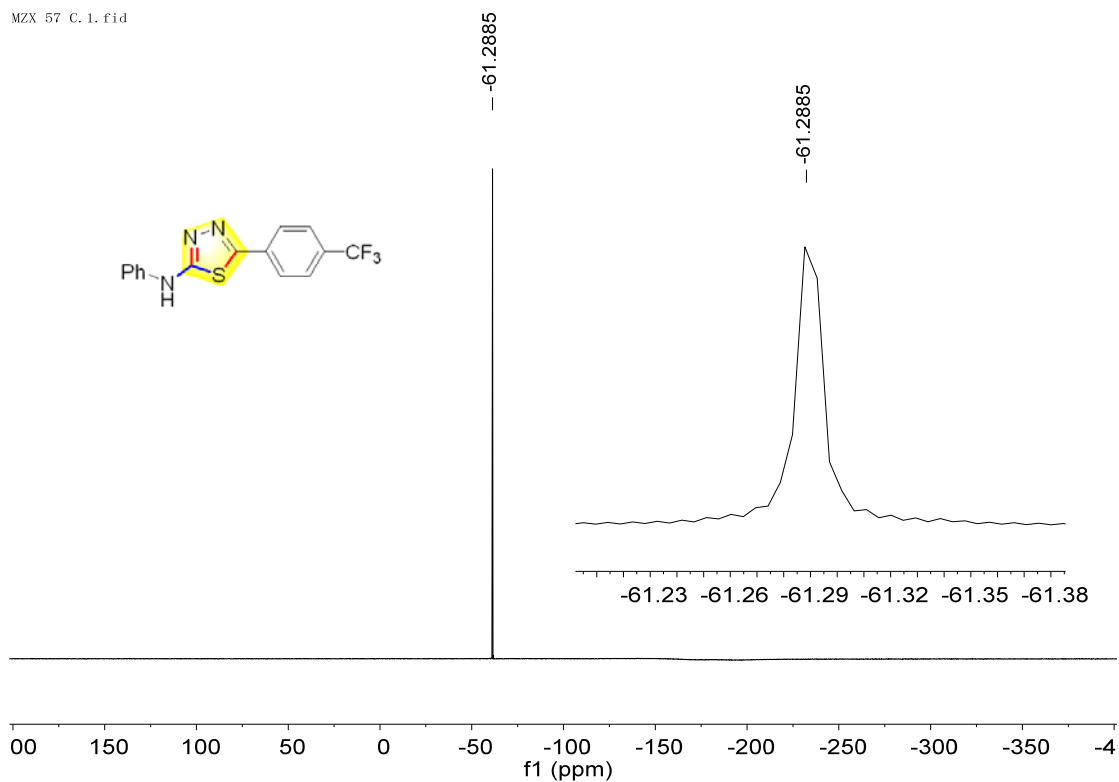

### 3ab, <sup>1</sup>H NMR

MZX 63 C. 1. fid

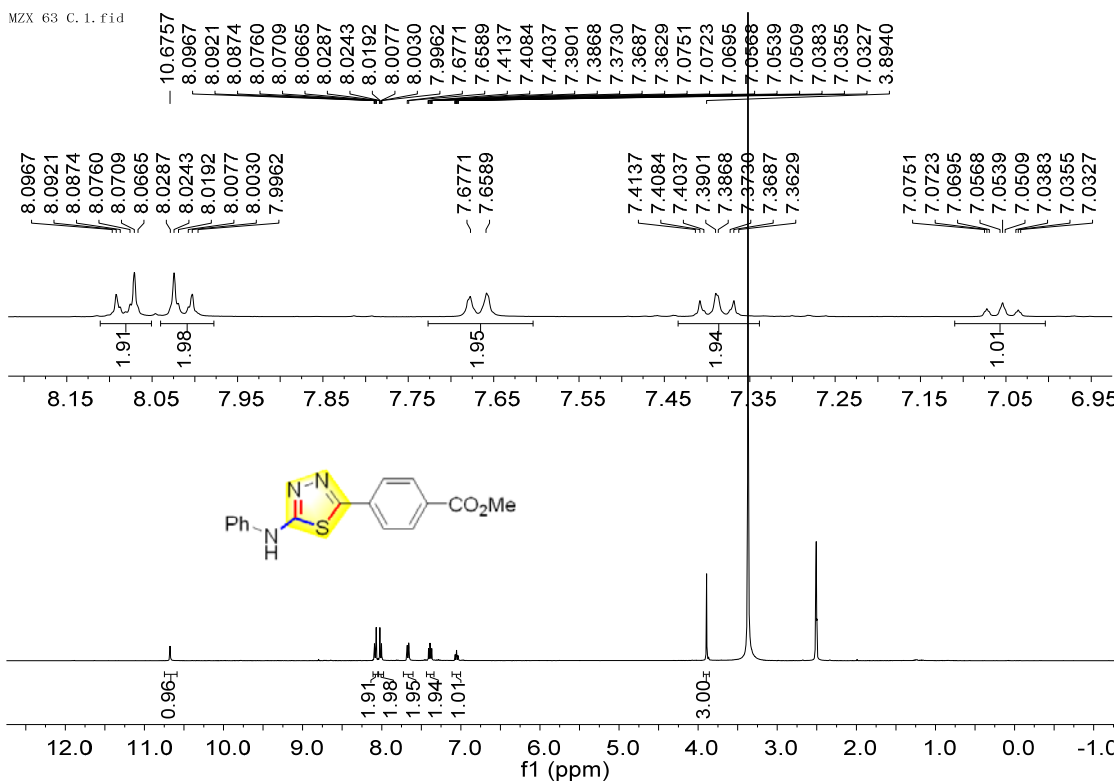

### <sup>13</sup>C NMR

MZX 63 C. 2. fid

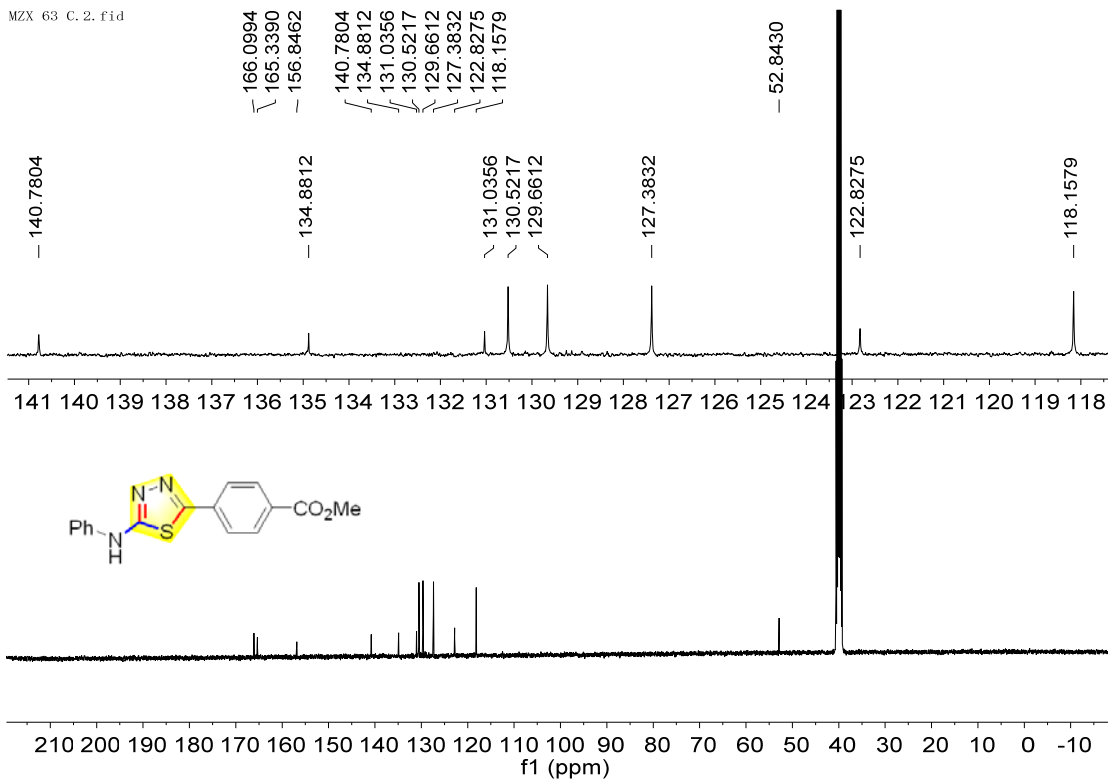

# DEPT 90 and DEPT 135

MZX 63 C. 3. fid  
90

130.5220  
129.6617  
127.3827  
122.8276  
118.1576

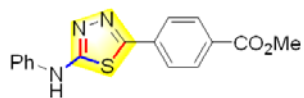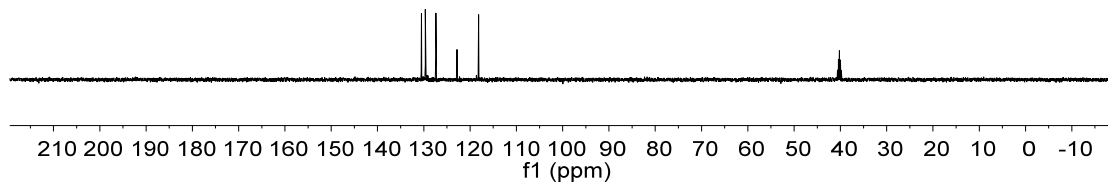

MZX 63 C. 4. fid  
135

130.5218  
129.6616  
127.3822  
122.8272  
118.1576

52.8453

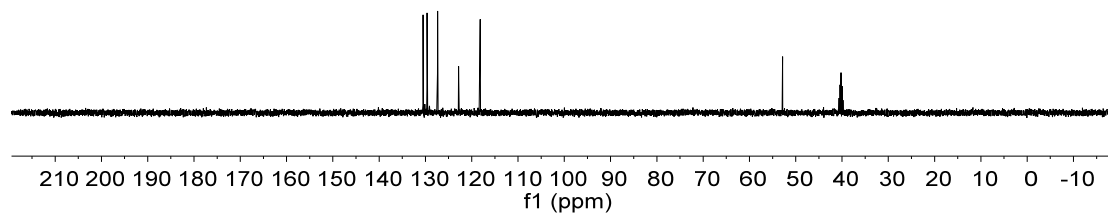

### 3ac, <sup>1</sup>H NMR

MZX 73.10.fid

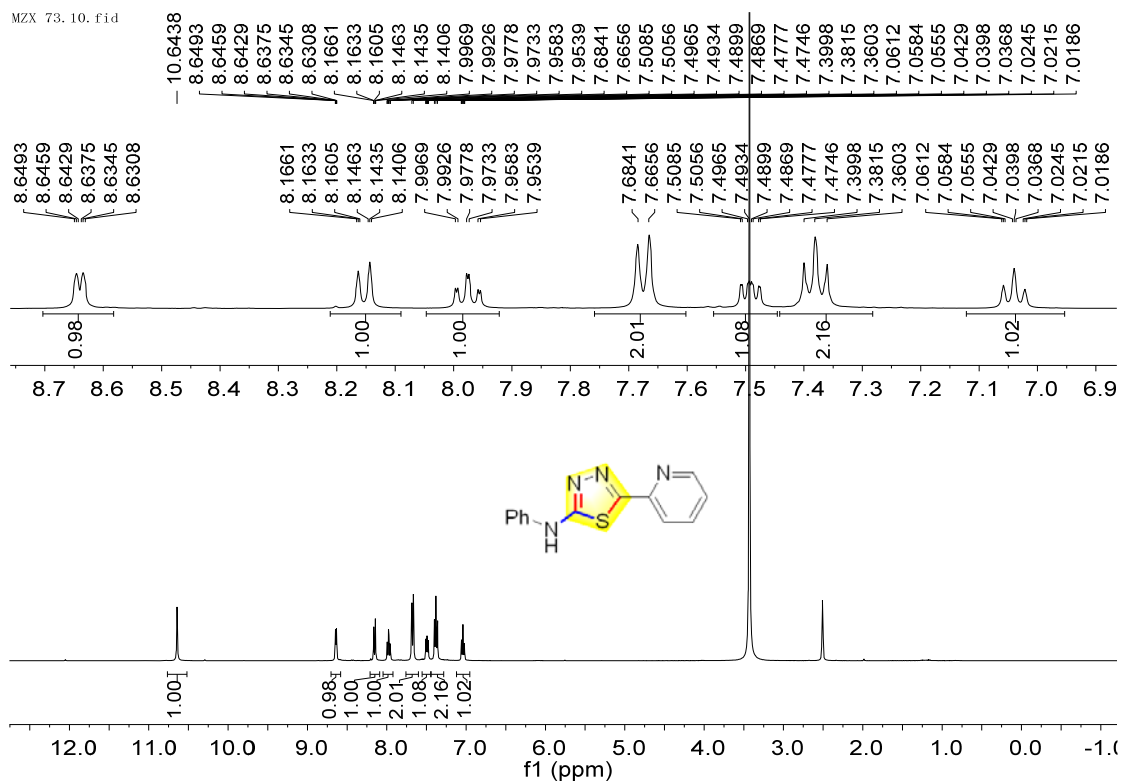

### <sup>13</sup>C NMR

MZX 73.11.fid

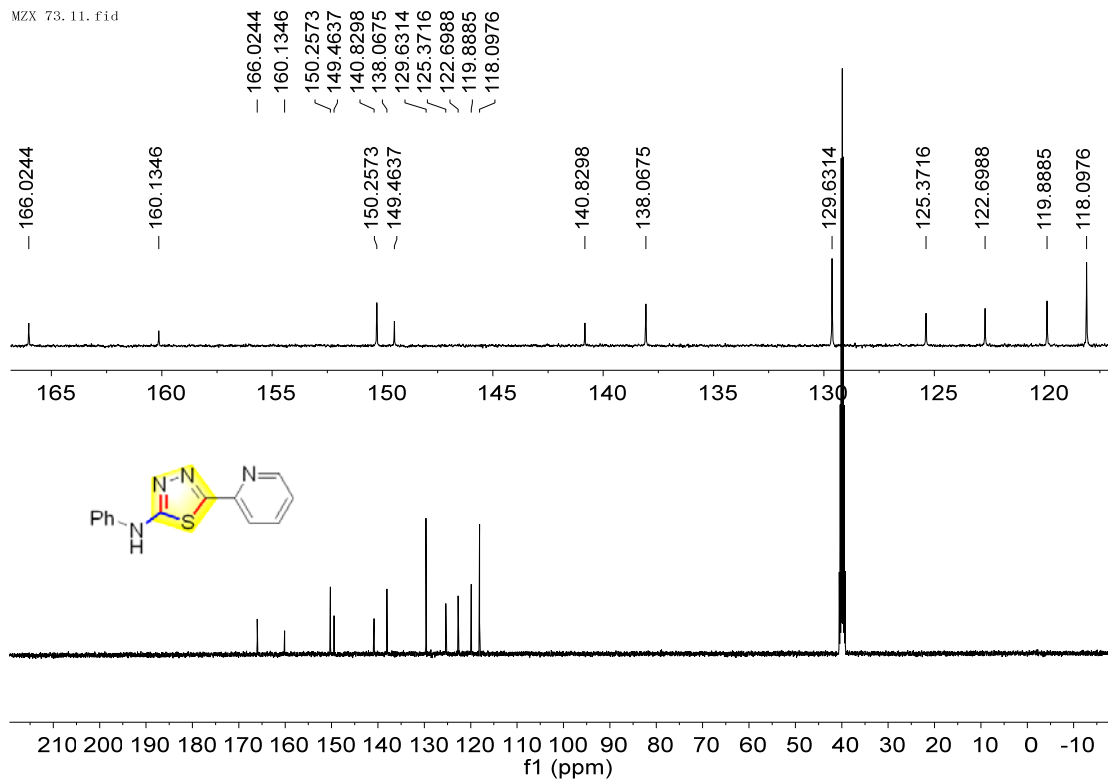

# DEPT 90 and DEPT 135

MZX 73.12.fid  
90

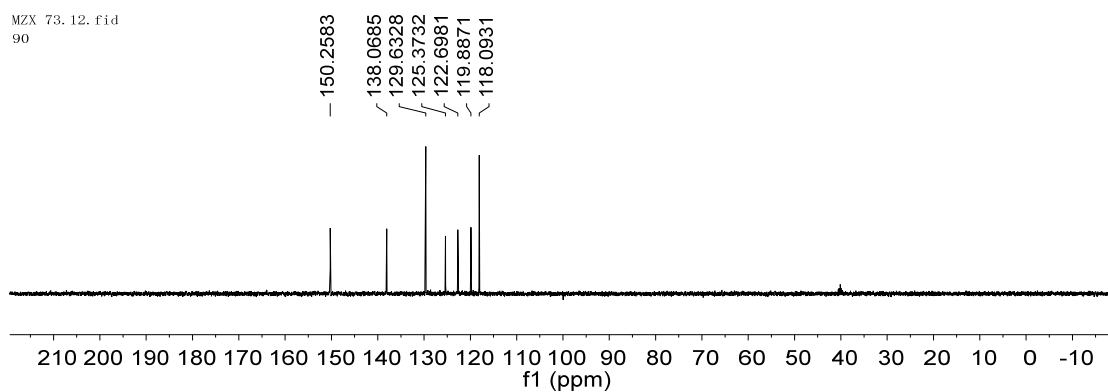

MZX 73.13.fid  
135

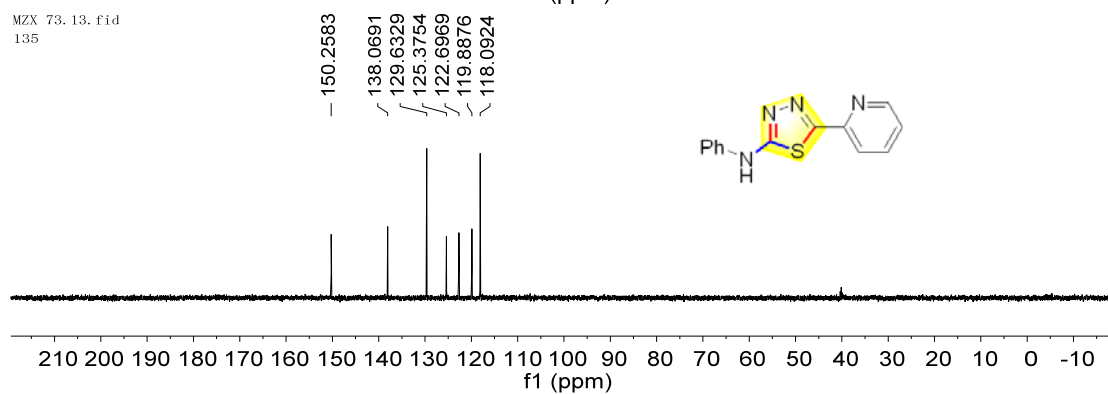

### 3ad, <sup>1</sup>H NMR

MZX 99.1. fid

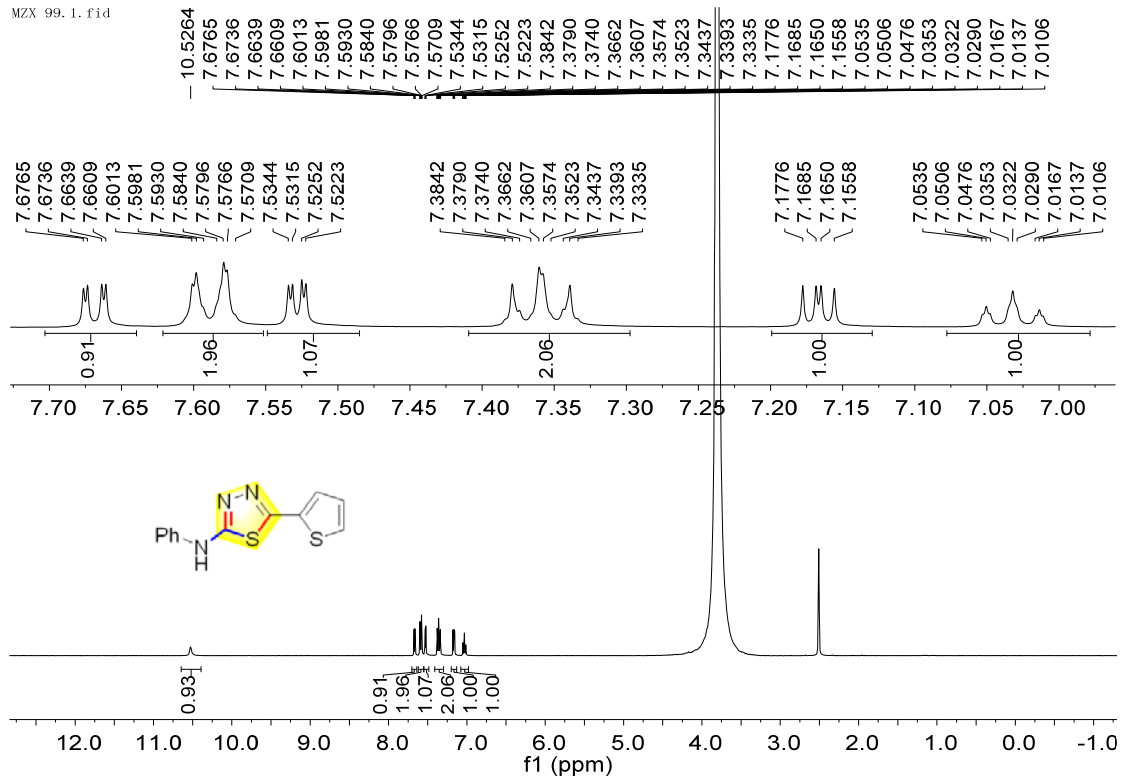

### <sup>13</sup>C NMR

MZX 99 C.2. fid

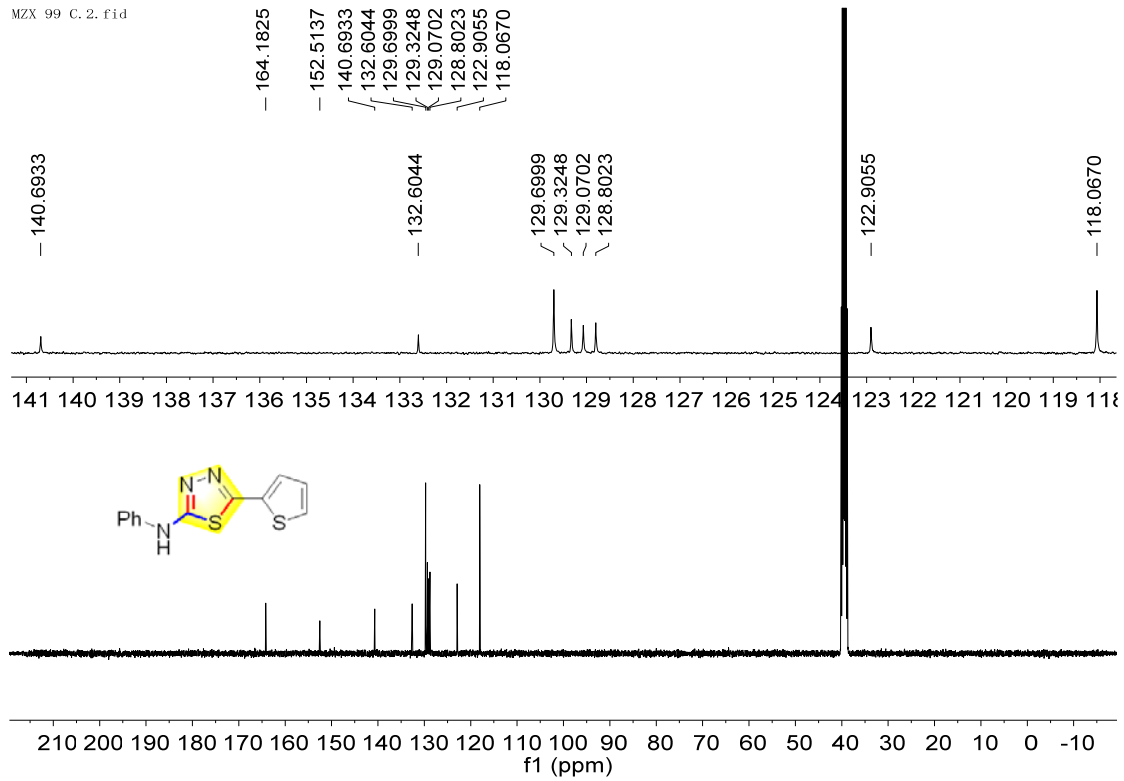

# DEPT 90 and DEPT 135

MZX 99 C. 3. fid  
90

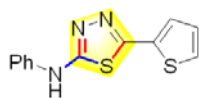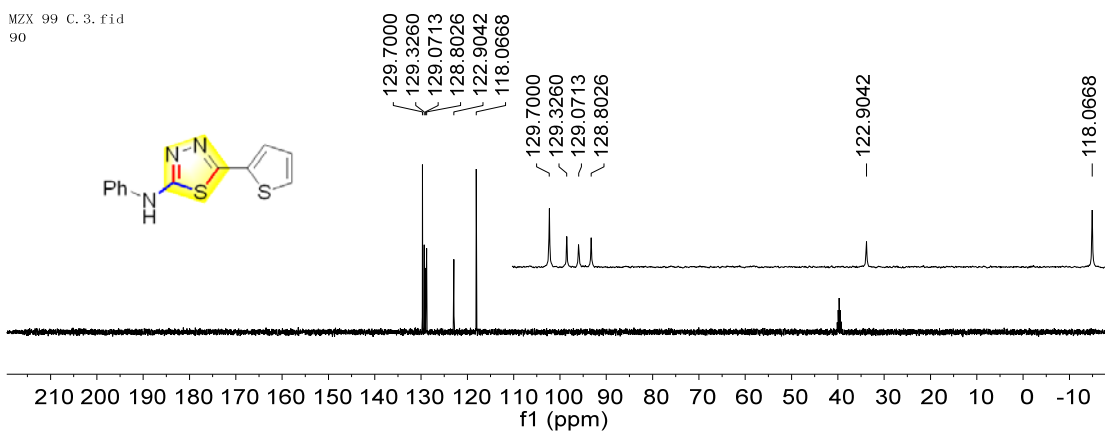

MZX 99 C. 4. fid  
135

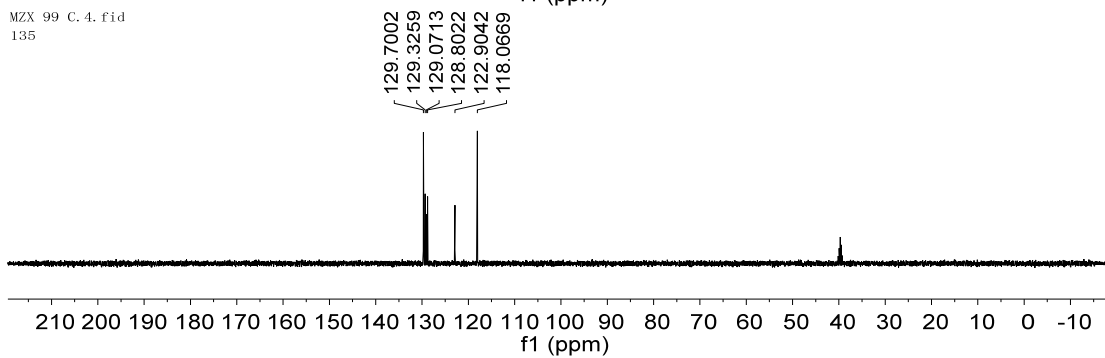

### 3ae, <sup>1</sup>H NMR

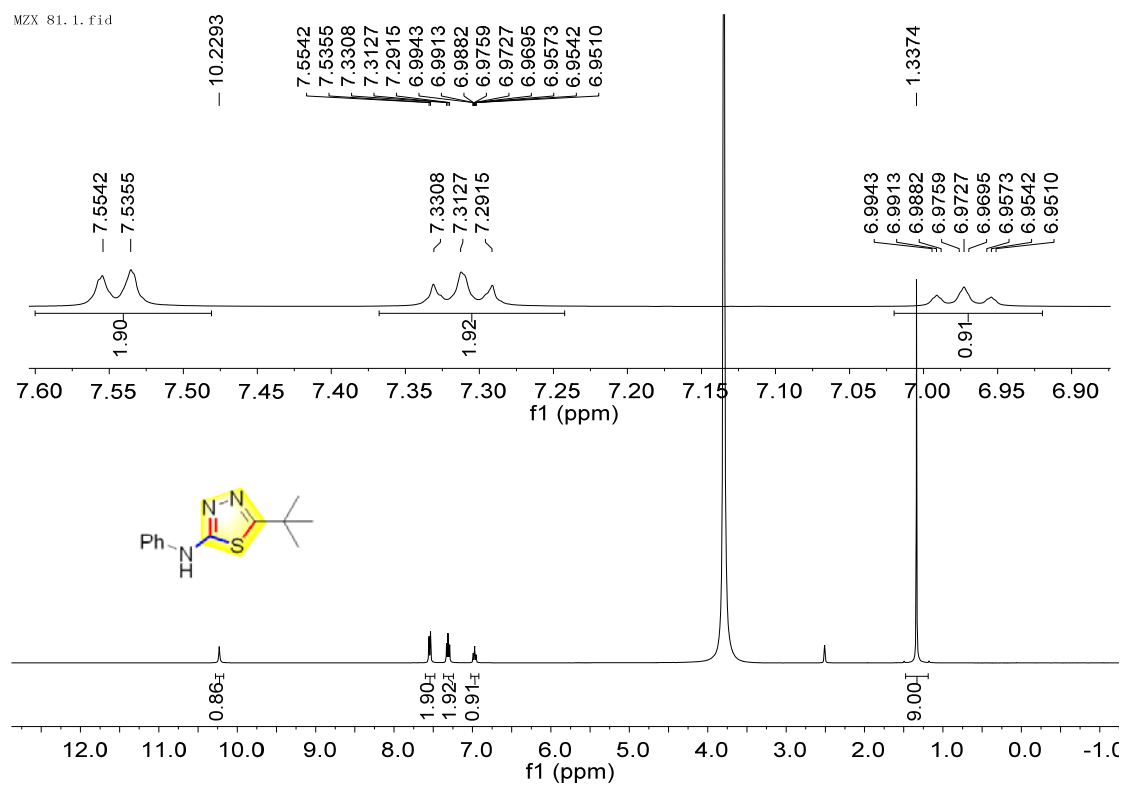

### <sup>13</sup>C NMR

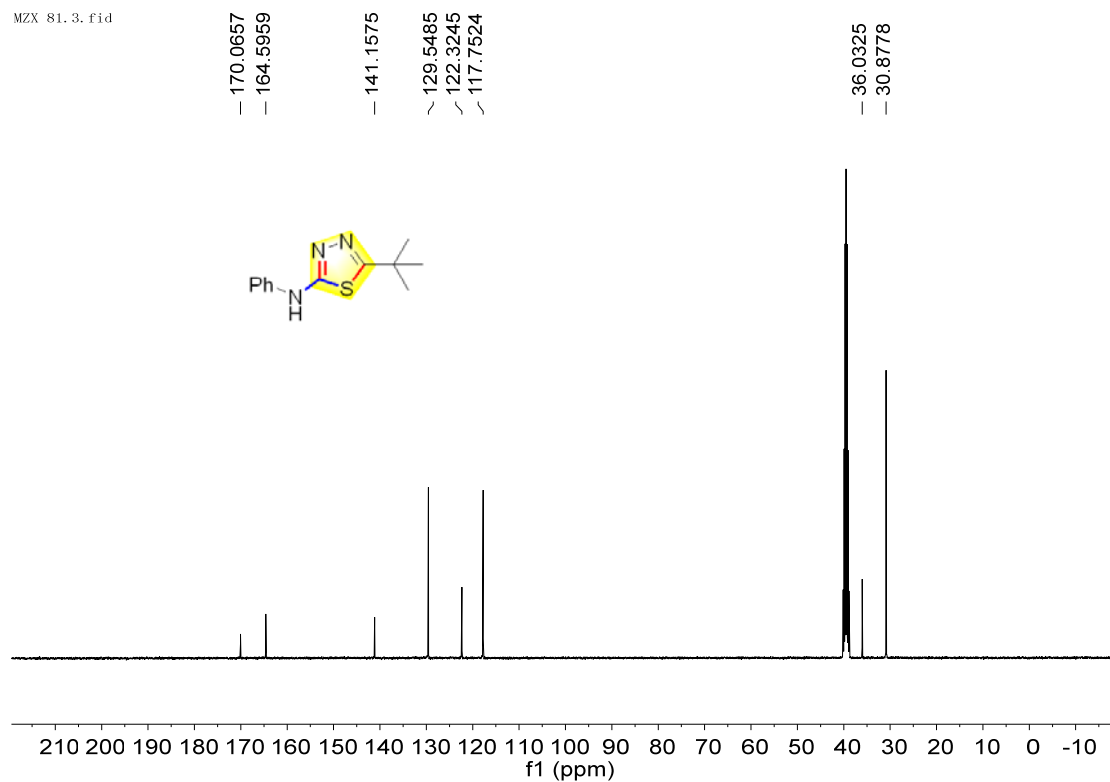



# DEPT 90 and DEPT 135

MZX 81.4.fid  
90

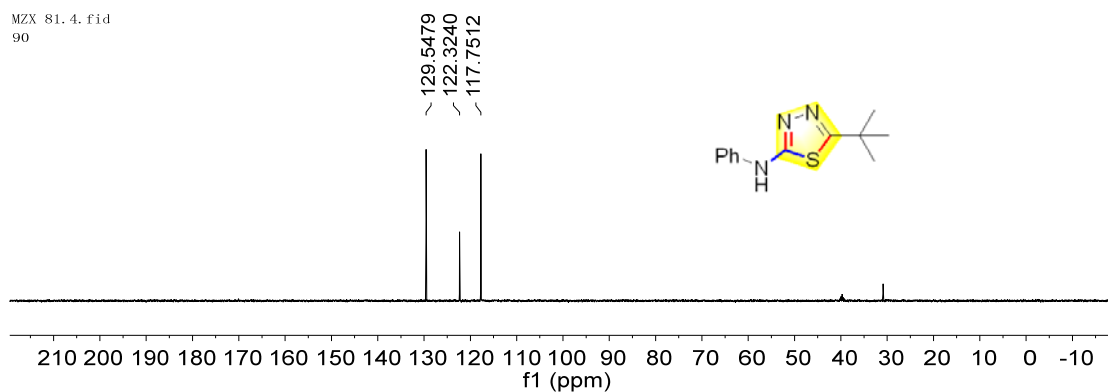

MZX 81.5.fid  
135

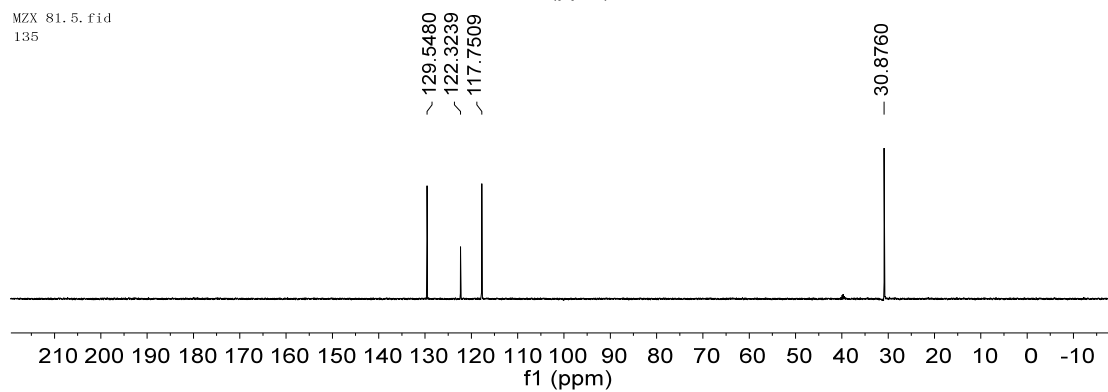

3af, <sup>1</sup>H NMR

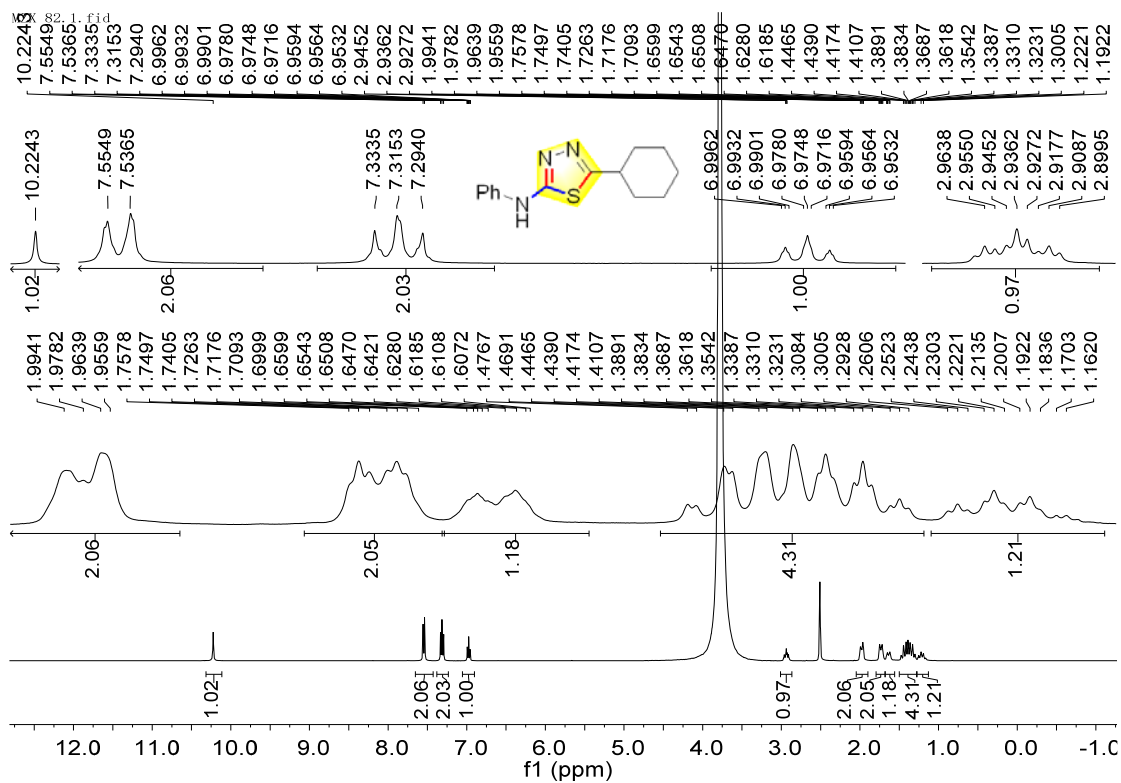

<sup>13</sup>C NMR

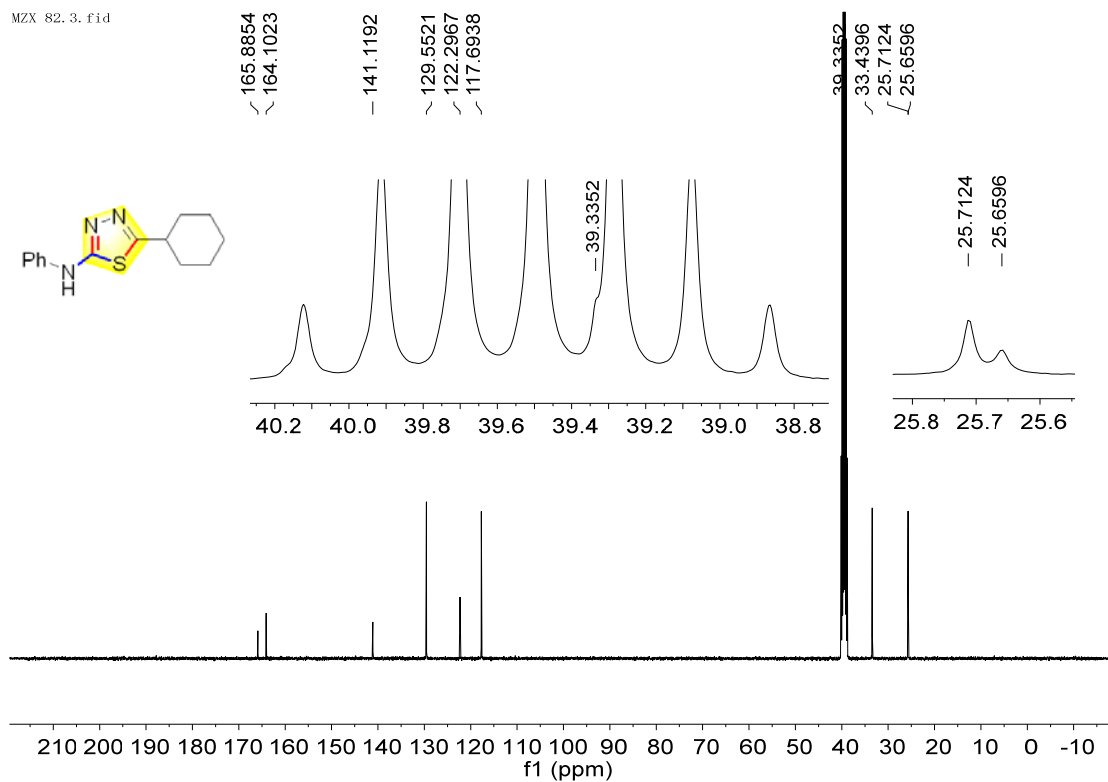

# DEPT 90 and DEPT 135

MZX 82.4.fid  
90

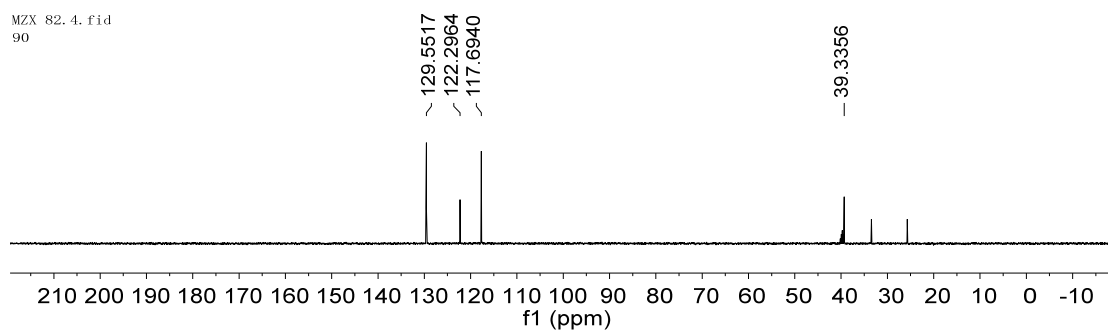

MZX 82.5.fid  
135

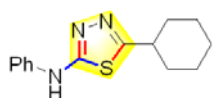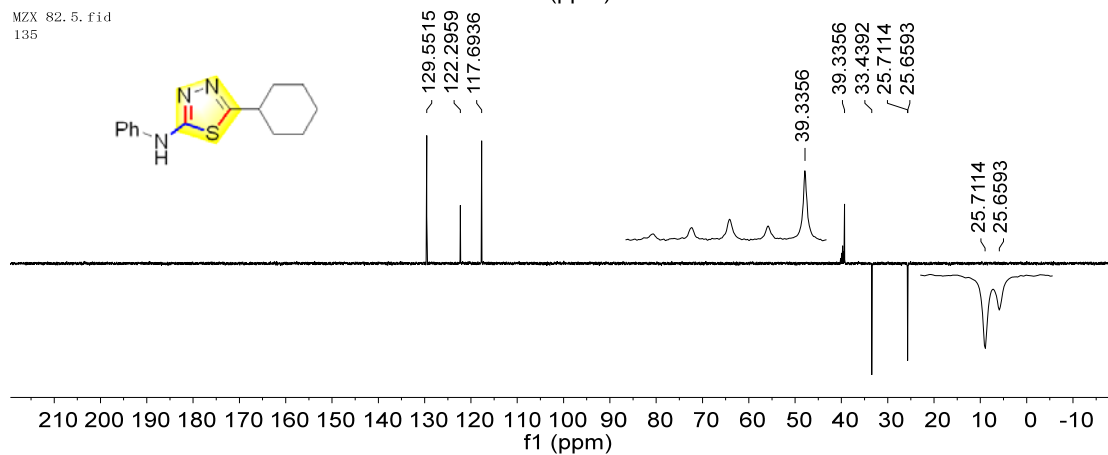

### 3ag, <sup>1</sup>H NMR

MZX 93.1.fid

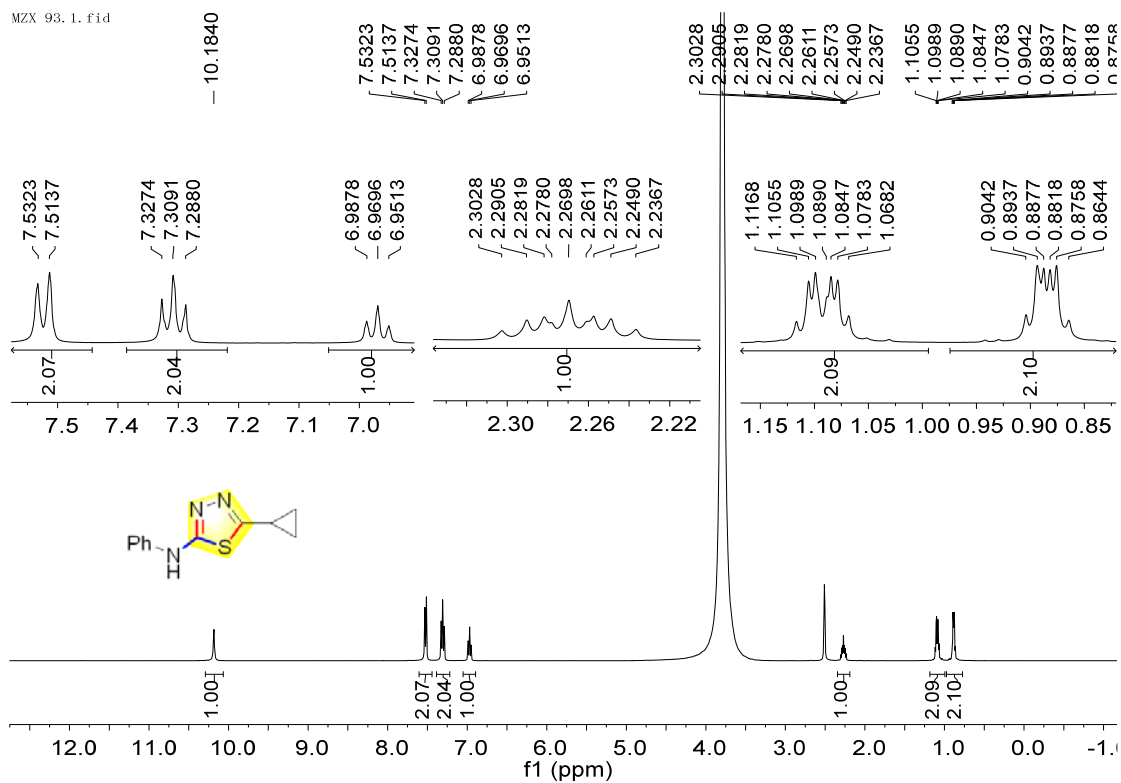

### <sup>13</sup>C NMR

MZX 93.3.fid

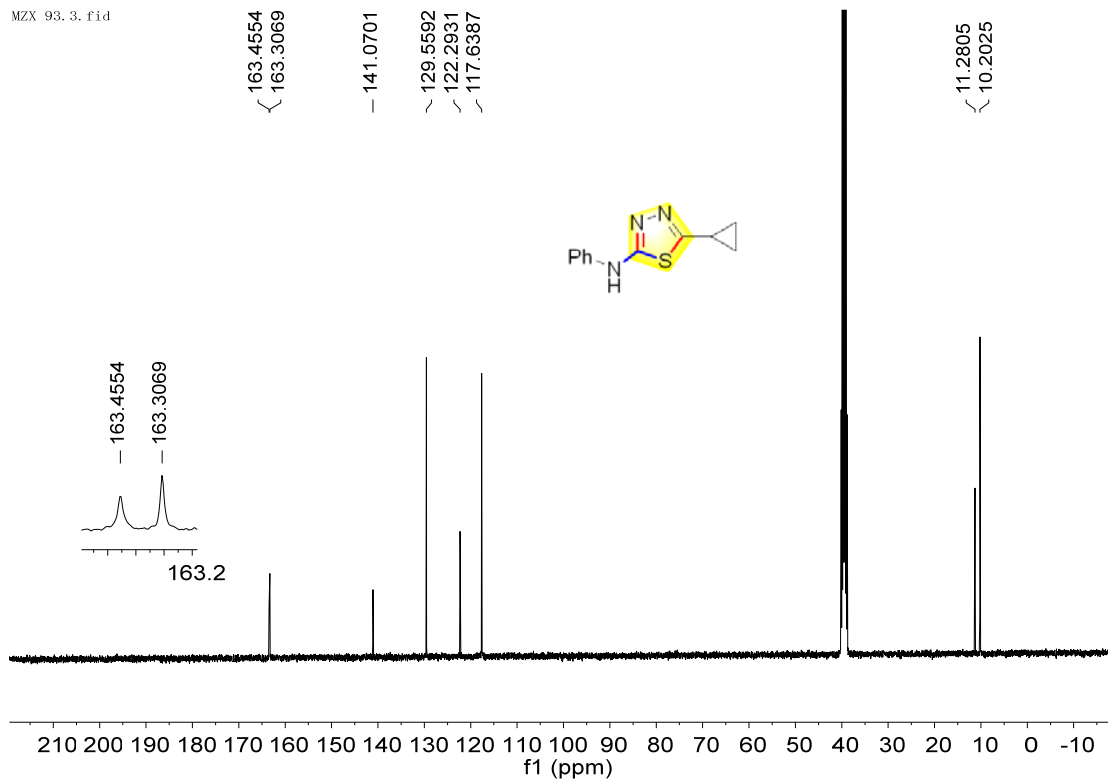

# DEPT 90 and DEPT 135

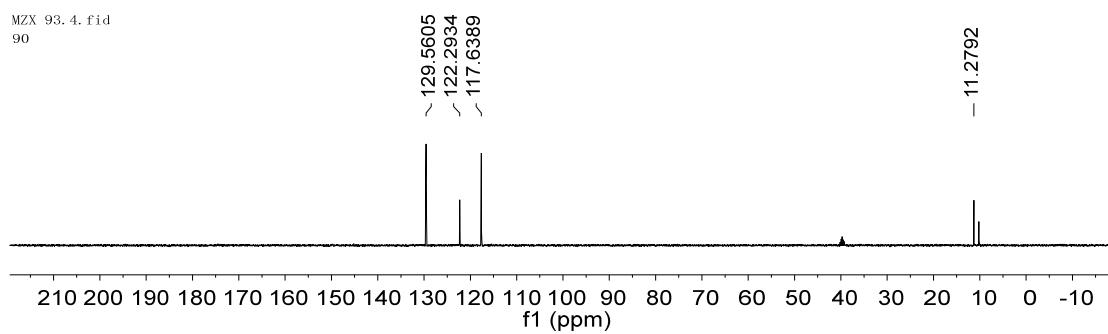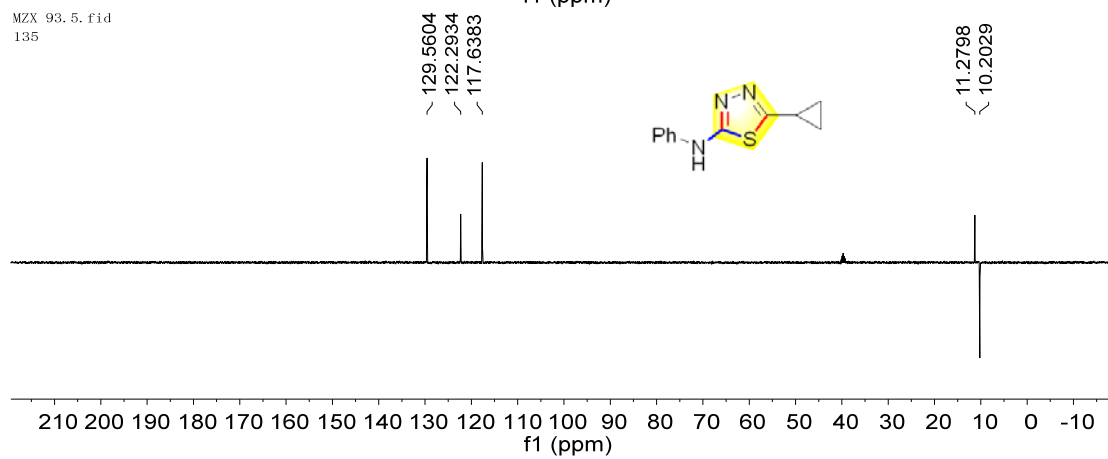

### 3ah, <sup>1</sup>H NMR

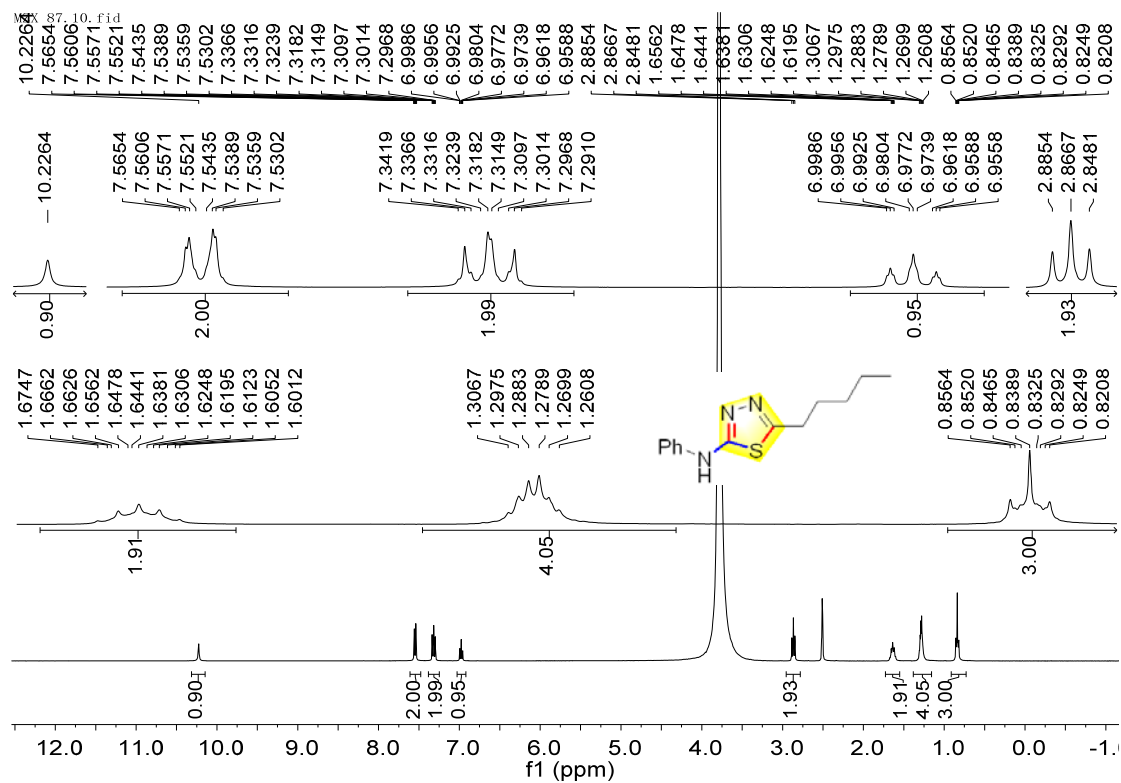

### <sup>13</sup>C NMR

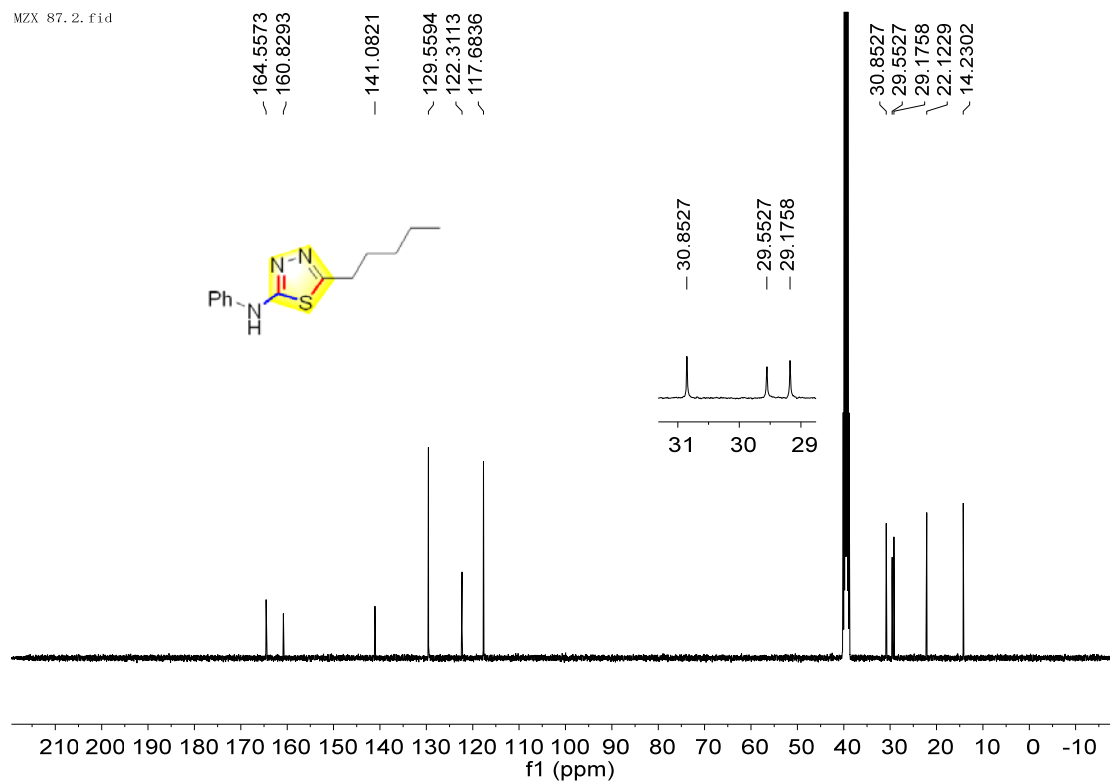

# DEPT 90 and DEPT 135

MZX 87.3.fid  
90

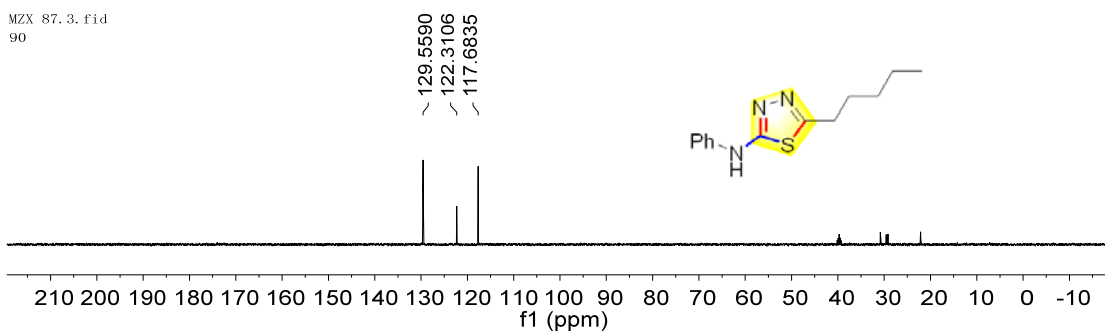

MZX 87.4.fid  
135

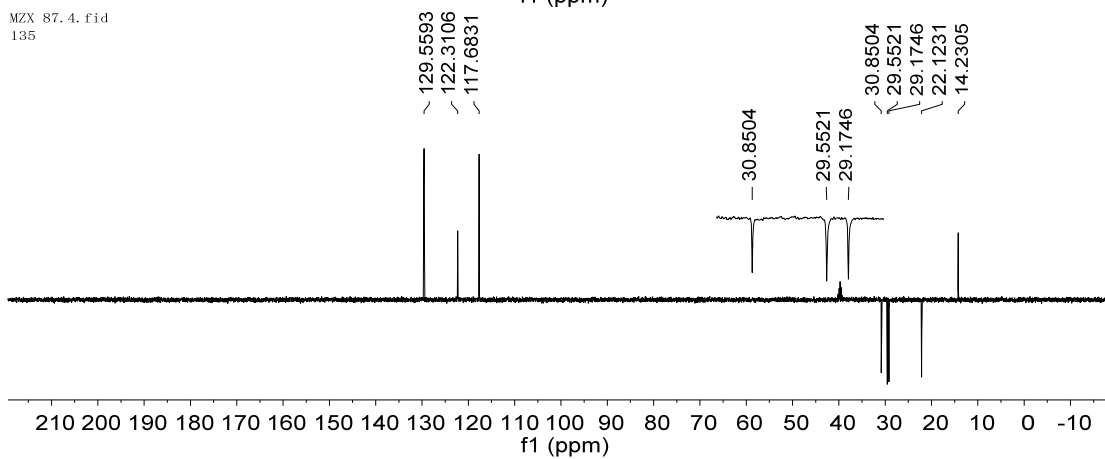

### 3ai, <sup>1</sup>H NMR

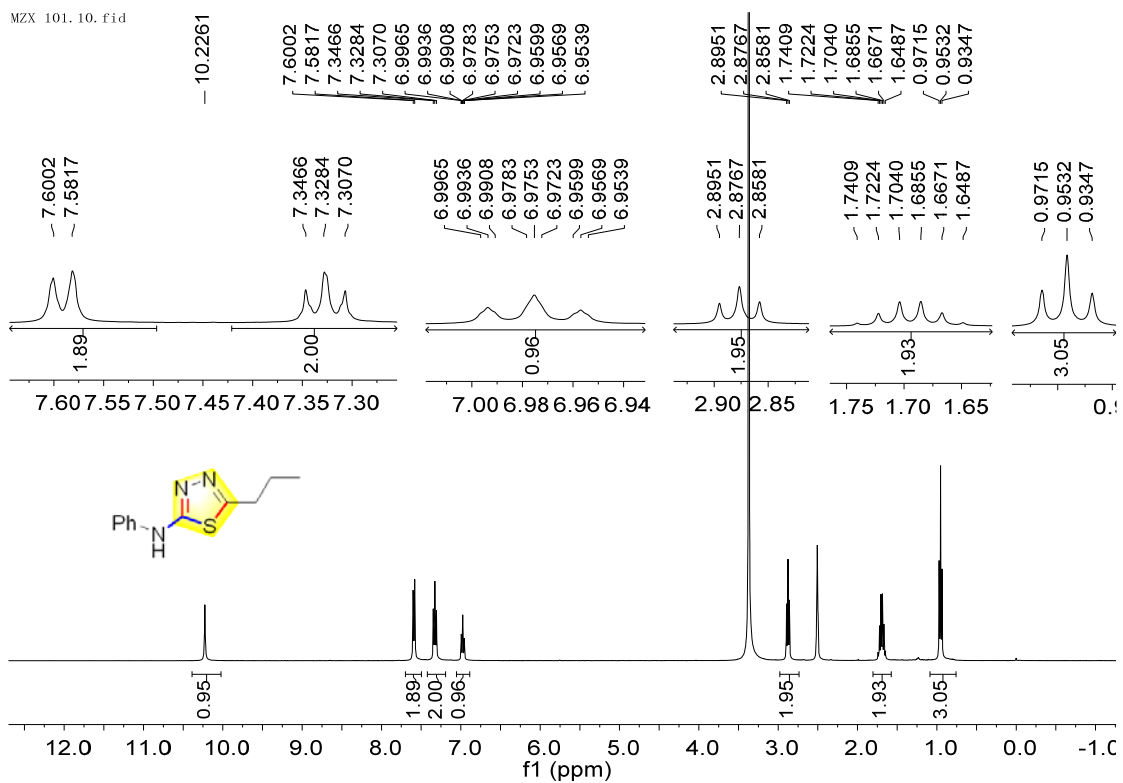

### <sup>13</sup>C NMR

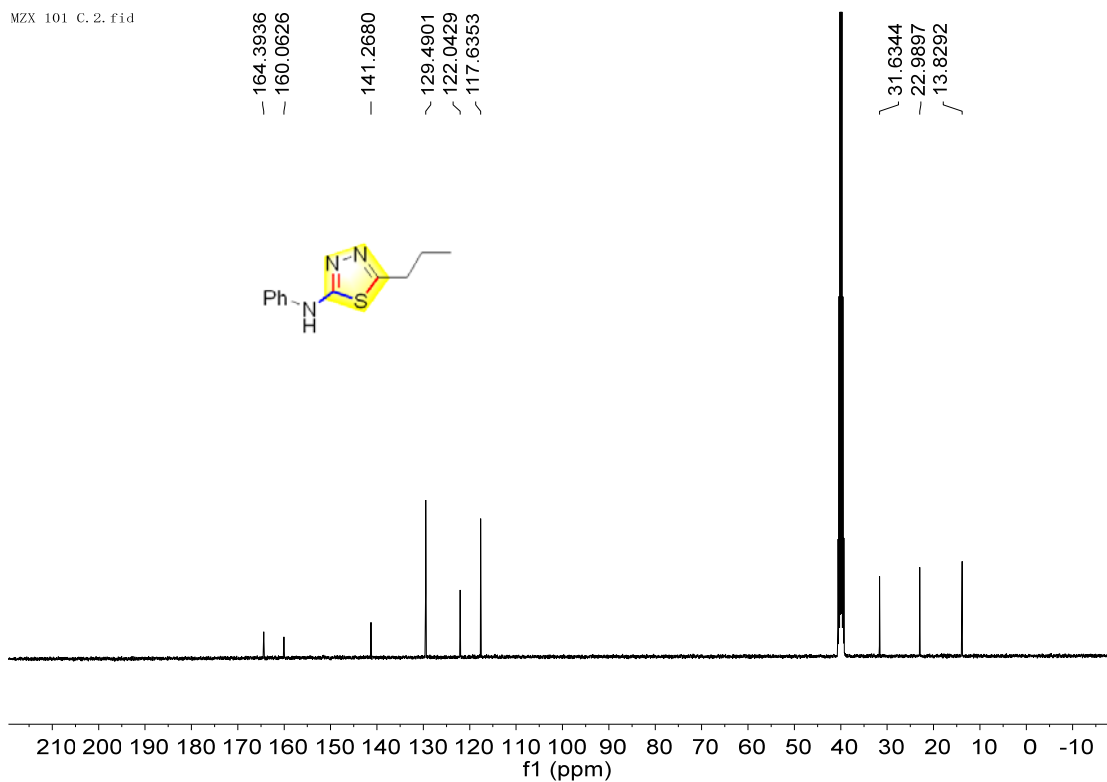



# DEPT 90 and DEPT 135

MZX 101 C. 3. fid  
90

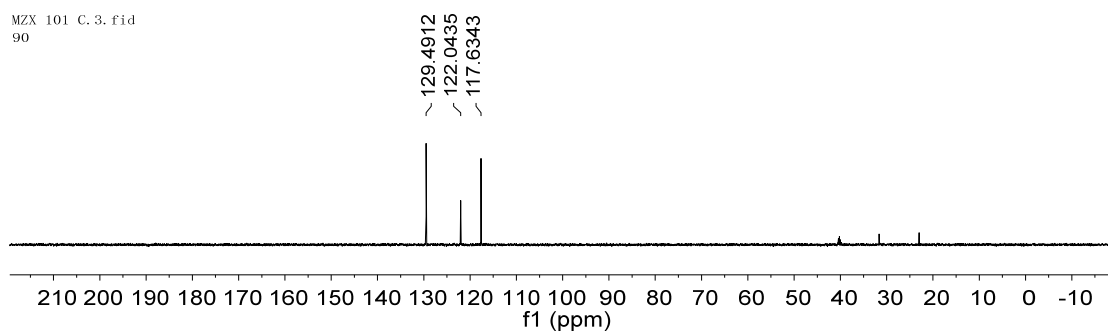

MZX 101 C. 4. fid  
135

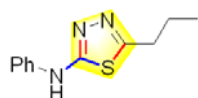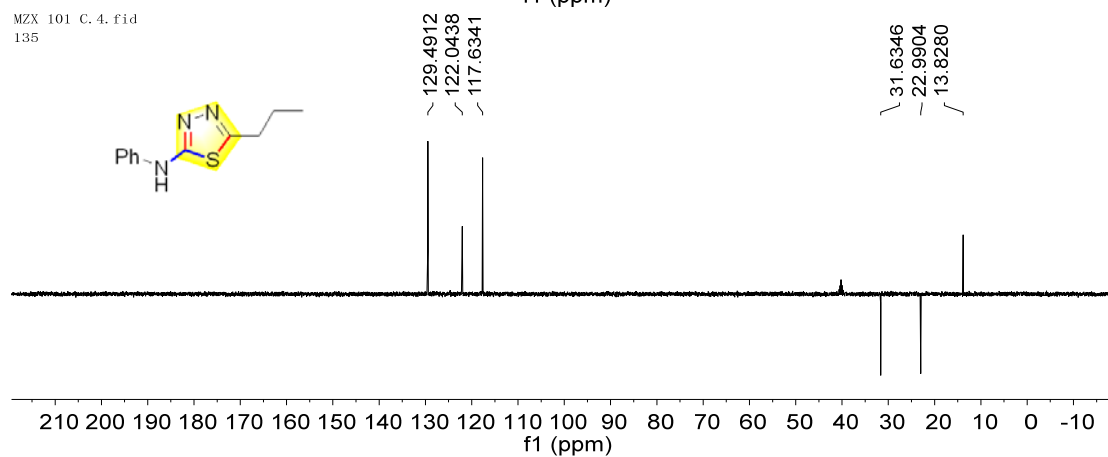

### 4a, <sup>1</sup>H NMR

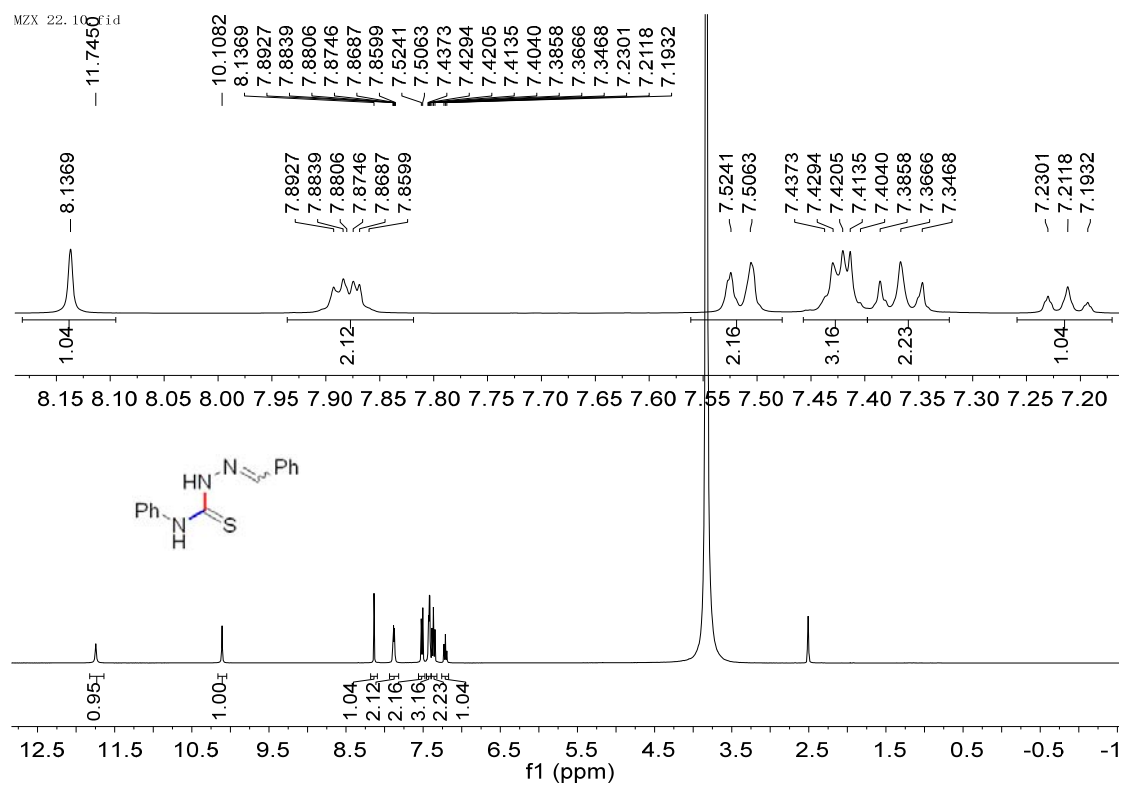

### <sup>13</sup>C NMR

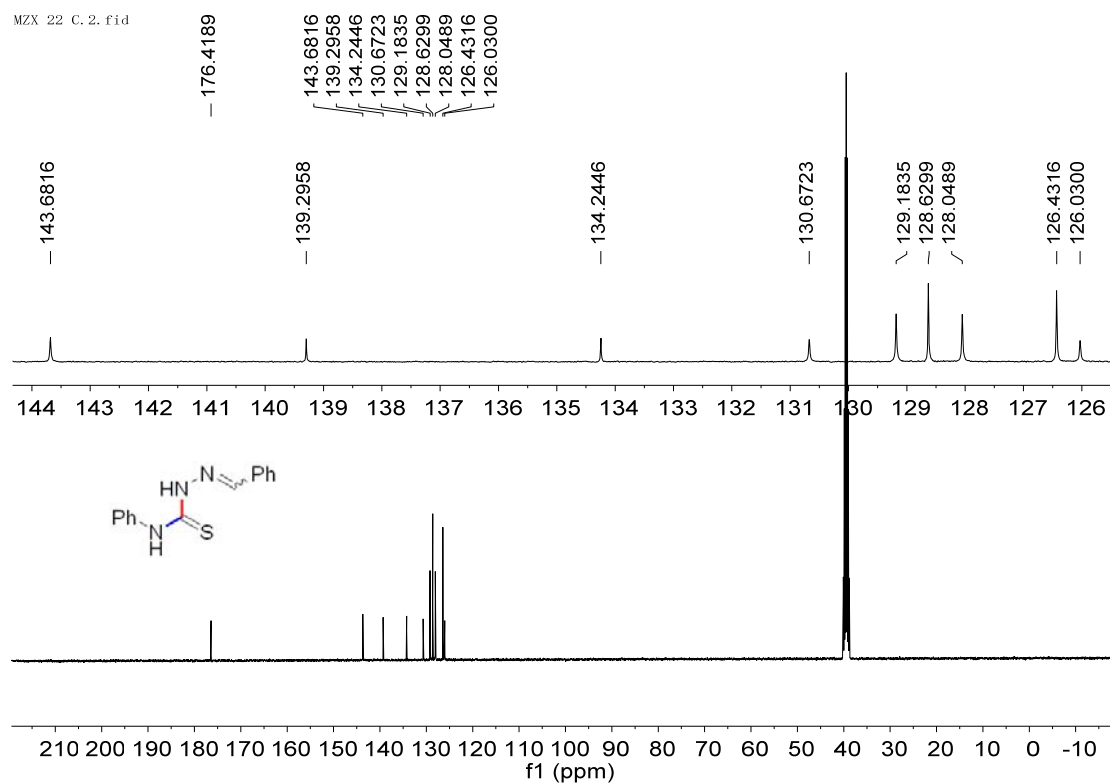

# DEPT 90 and DEPT 135

MZX 22 C. 3. fid  
90

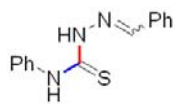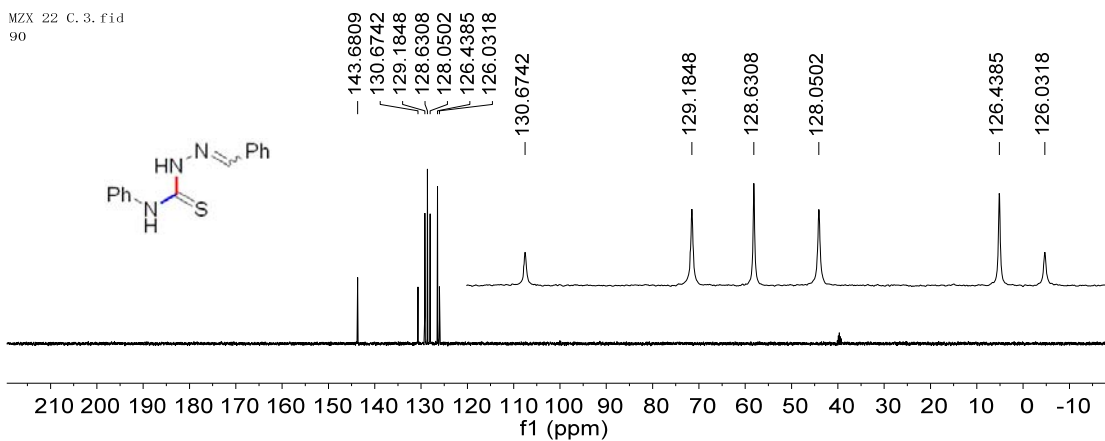

MZX 22 C. 4. fid  
135

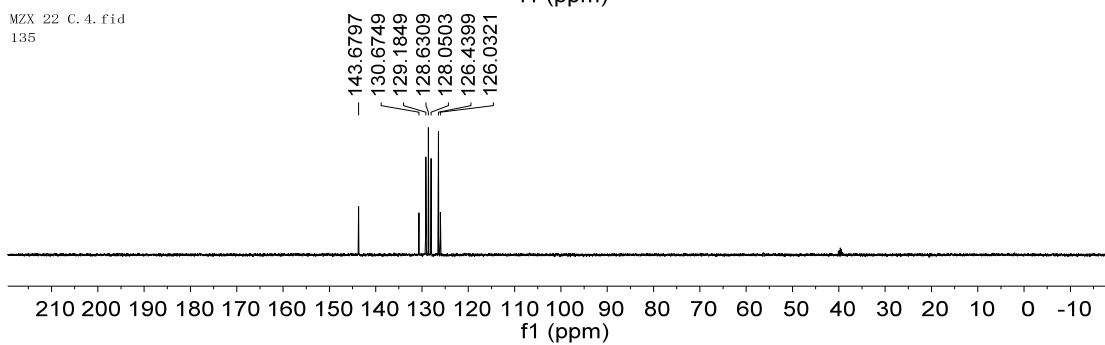

### 4j, <sup>1</sup>H NMR

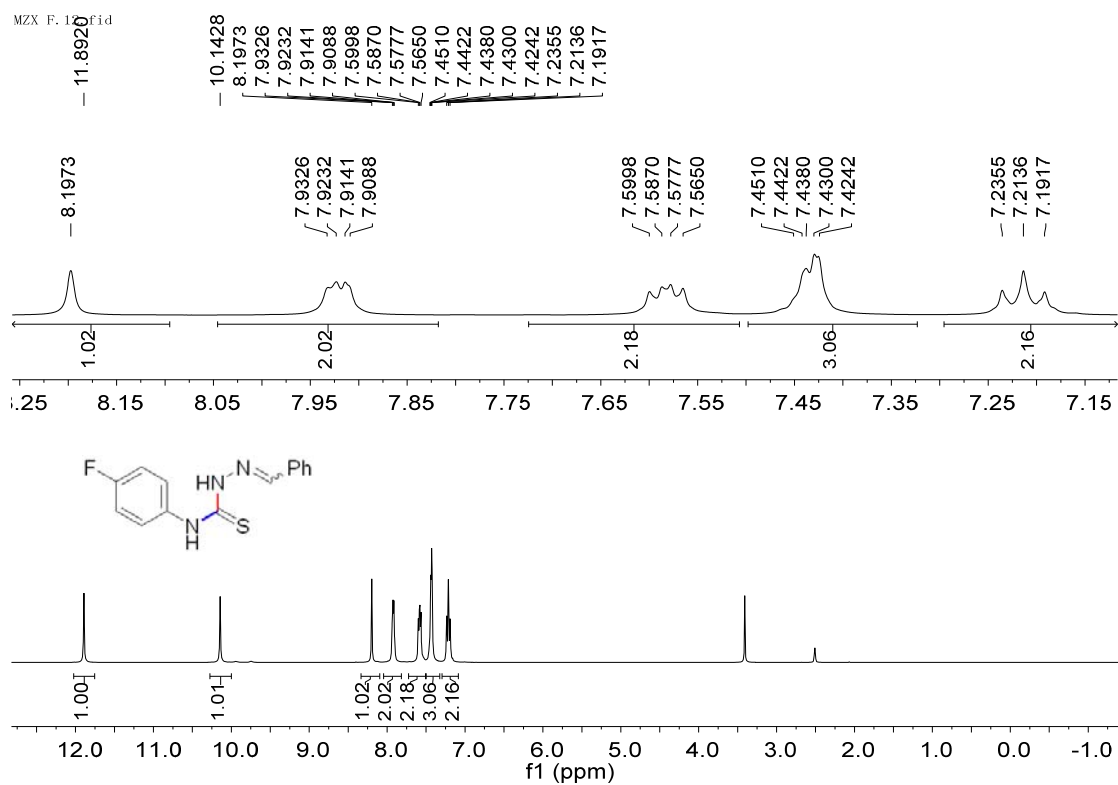

### <sup>13</sup>C NMR

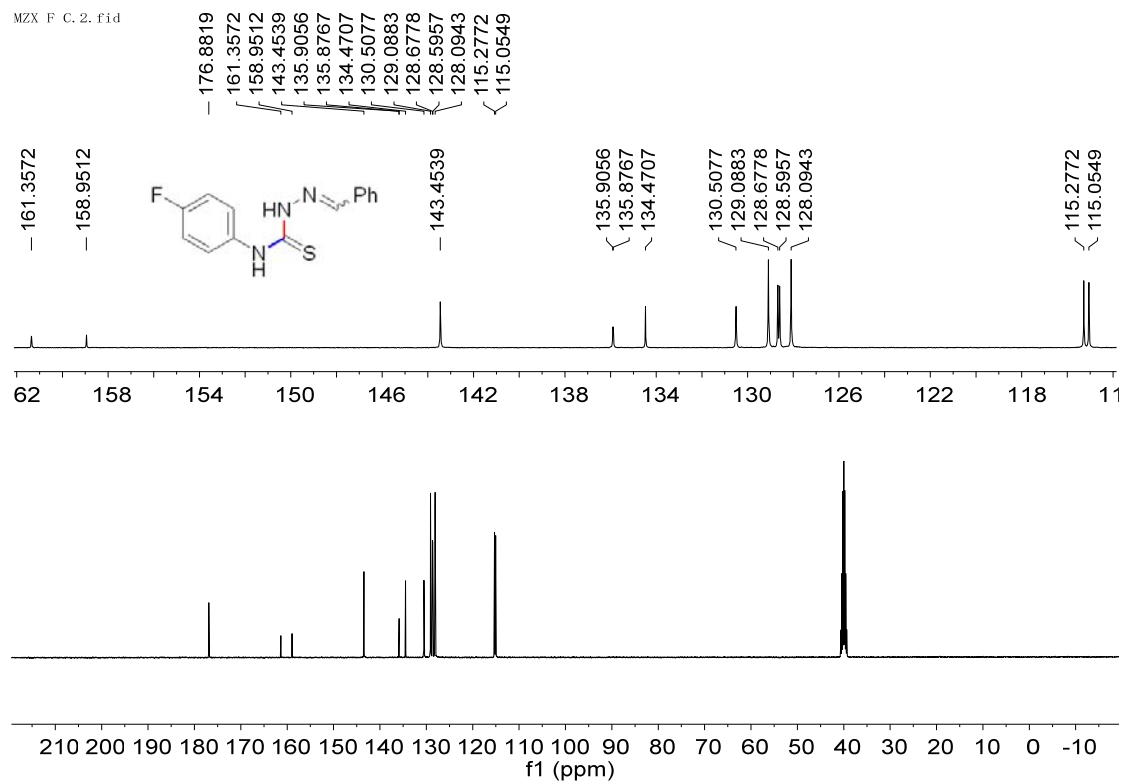

### DEPT 90 and DEPT 135

MZX F C. 3. fid  
90

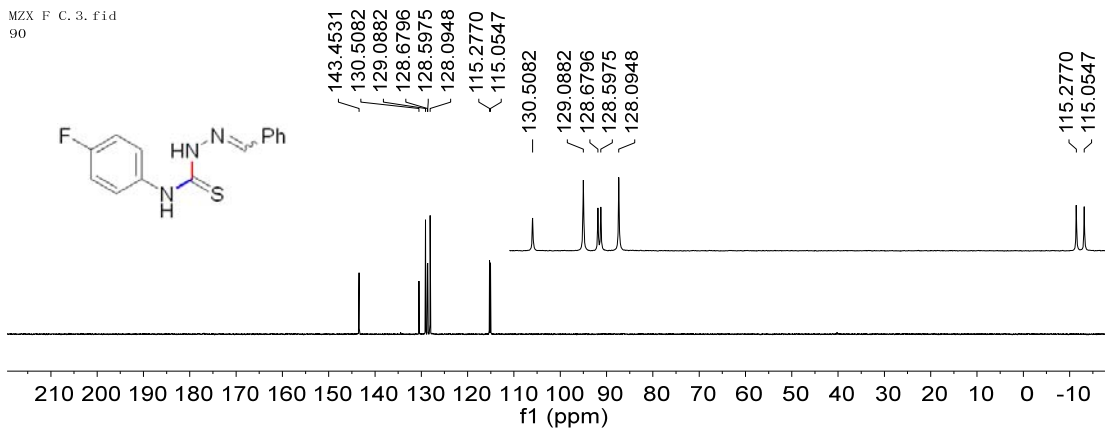

MZX F C. 4. fid  
135

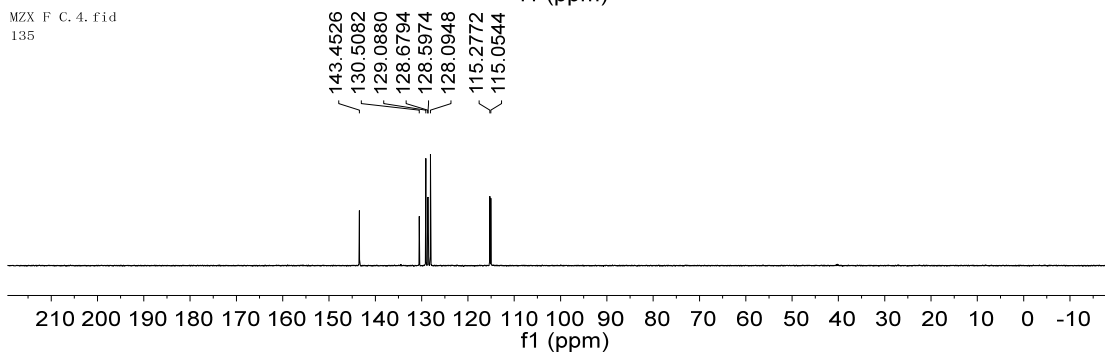

### <sup>19</sup>F NMR

MZX F. 10. fid  
F, NO DC

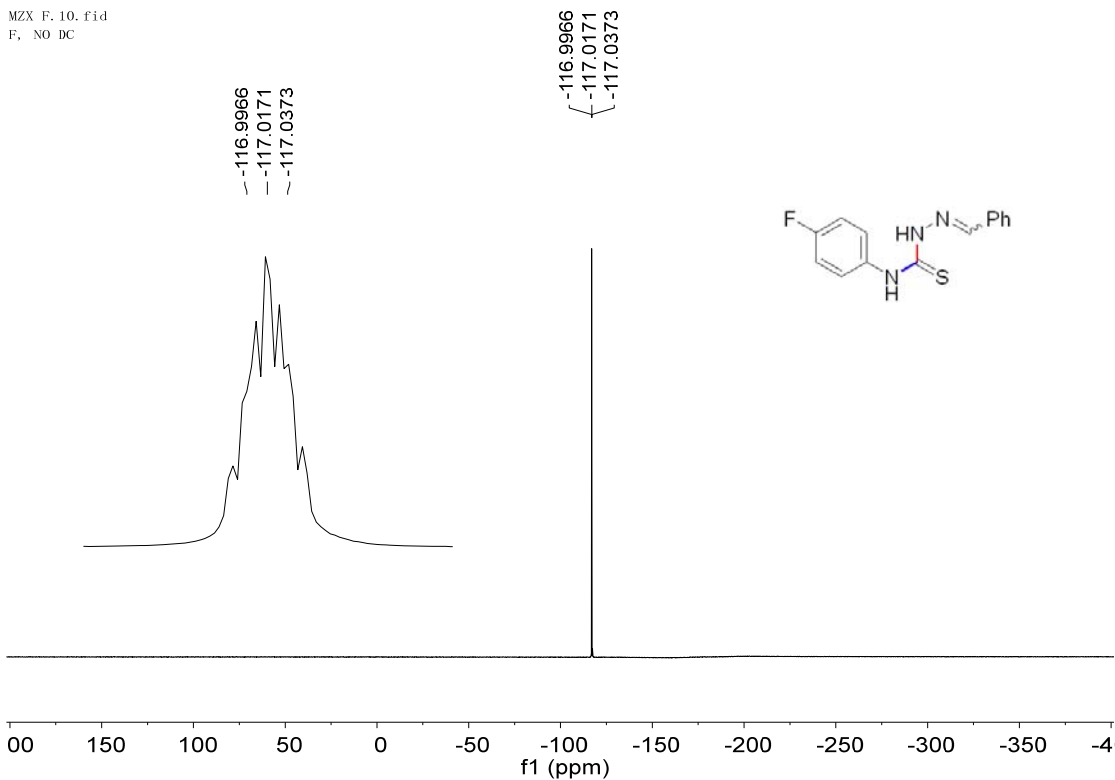

### 2p, <sup>1</sup>H NMR

MZX R-7. 11. fid

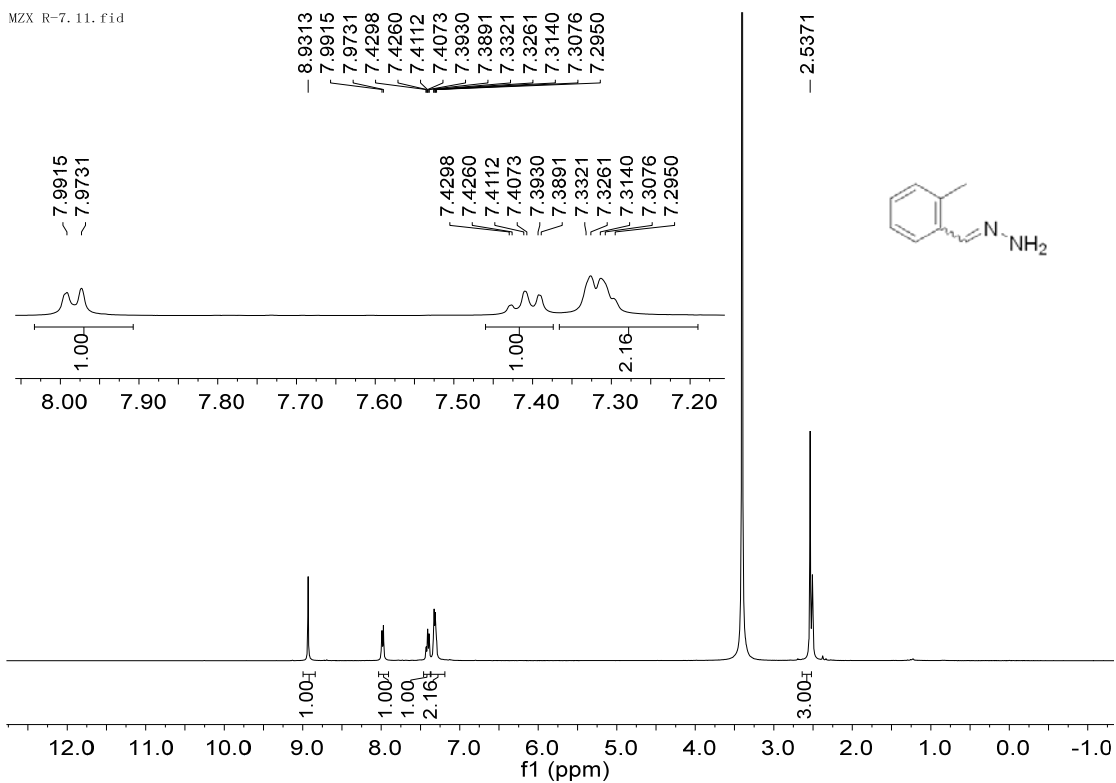

### <sup>13</sup>C NMR

MZX R-7. 12. fid

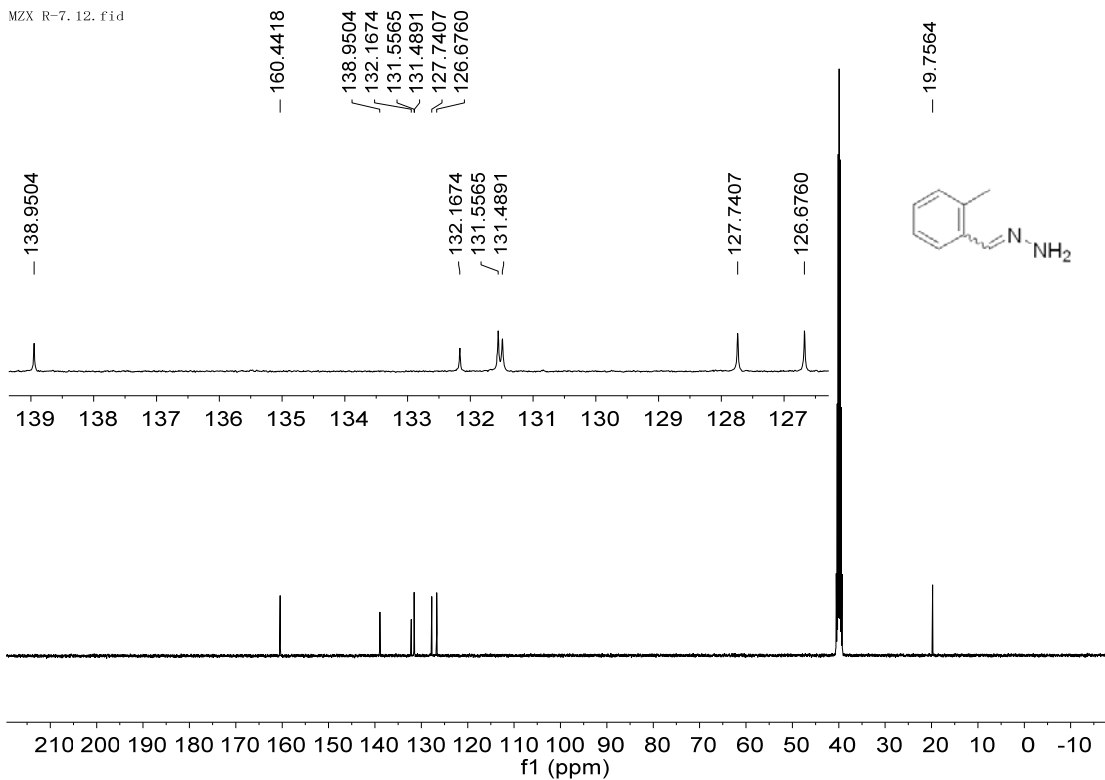

# DEPT 90 and DEPT 135

MZX R-7. 13. fid  
90

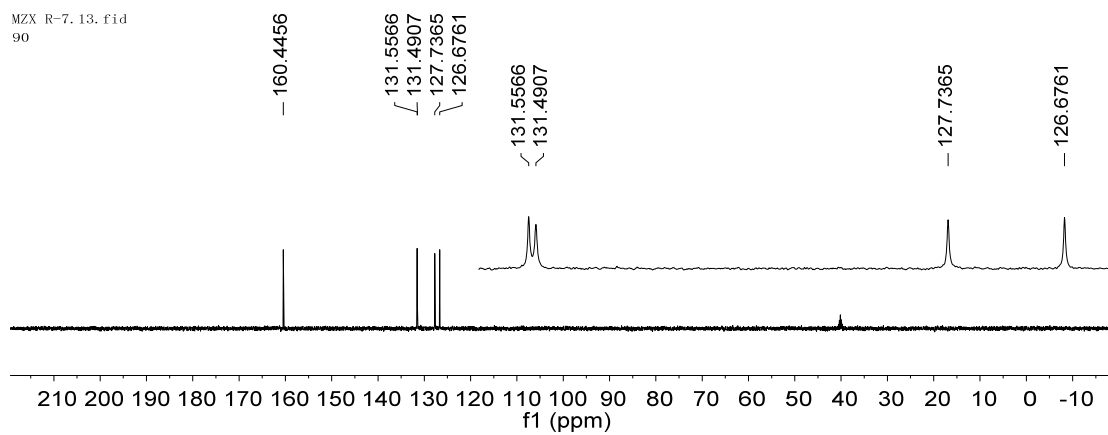

MZX R-7. 14. fid  
135

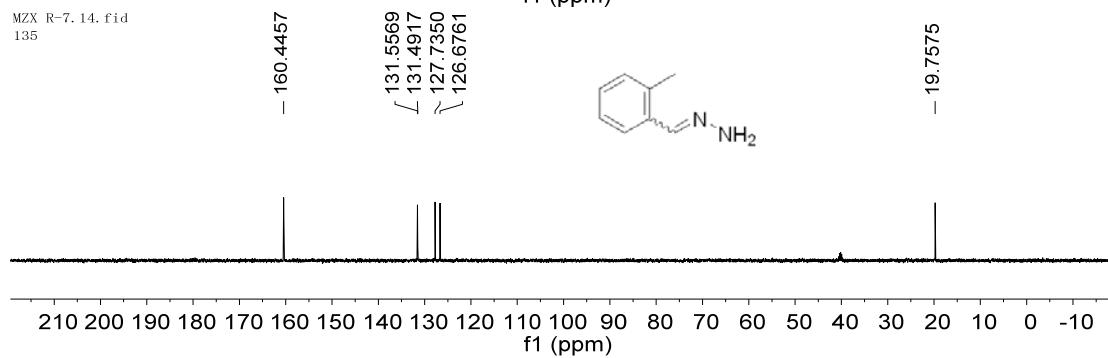

### 2q, <sup>1</sup>H NMR (in Pyridine-d<sub>5</sub>)

MZX R-20.10. fid

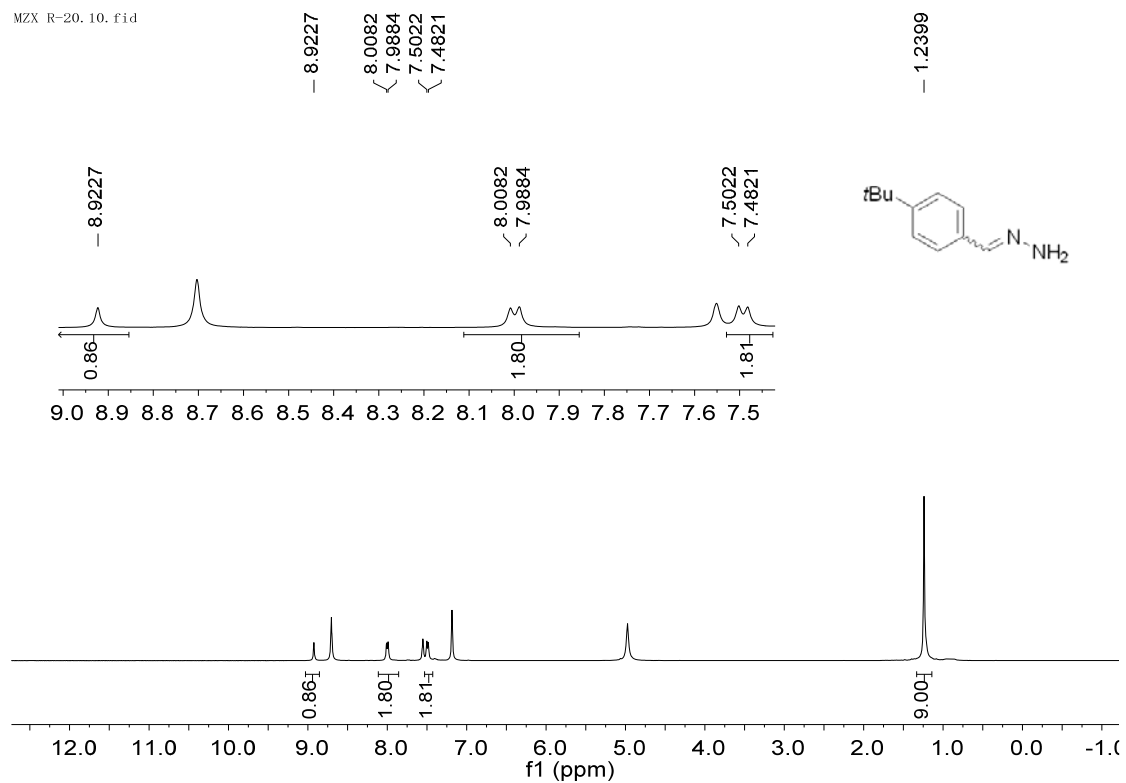

### <sup>13</sup>C NMR (in Pyridine-d<sub>5</sub>)

MZX R-20 C.2. fid

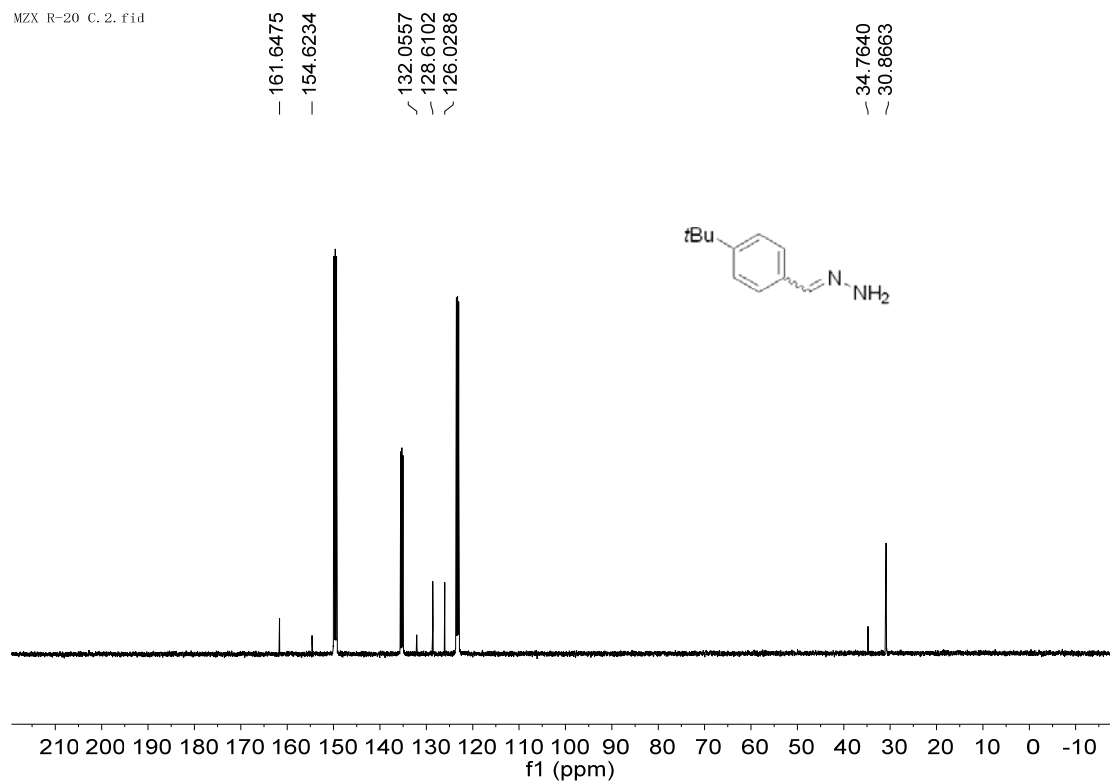



DEPT 90 and DEPT 135 (in Pyridine-*d*<sub>5</sub>)

MZX R-20 C. 3. fid  
90

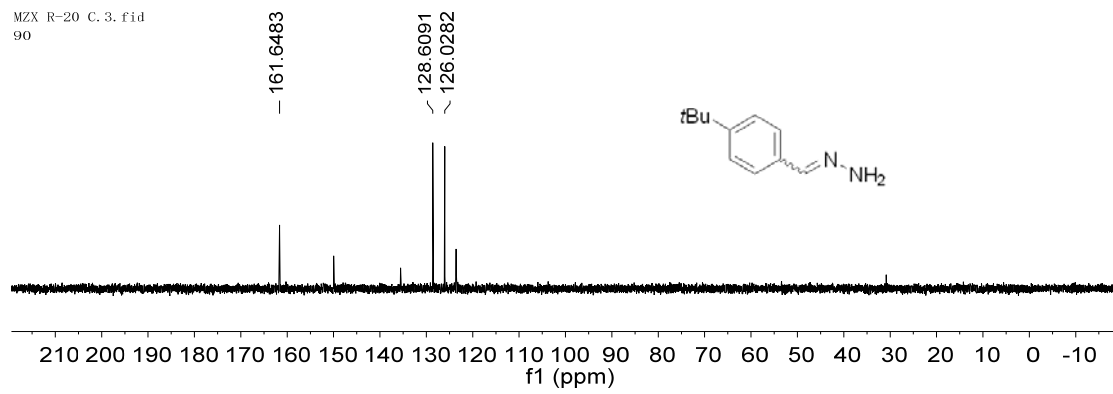

MZX R-20 C. 4. fid  
135

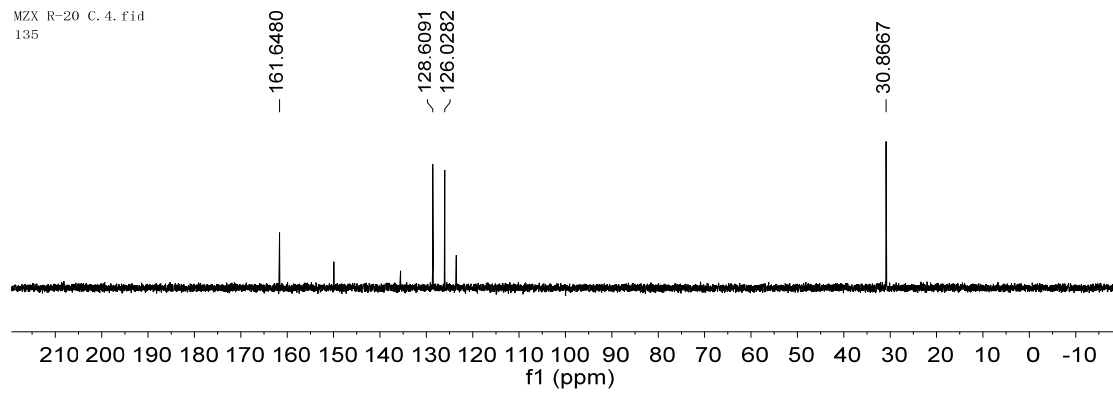

### 2r, <sup>1</sup>H NMR (in Pyridine-d<sub>5</sub>)

MZX R-12. 10. fid

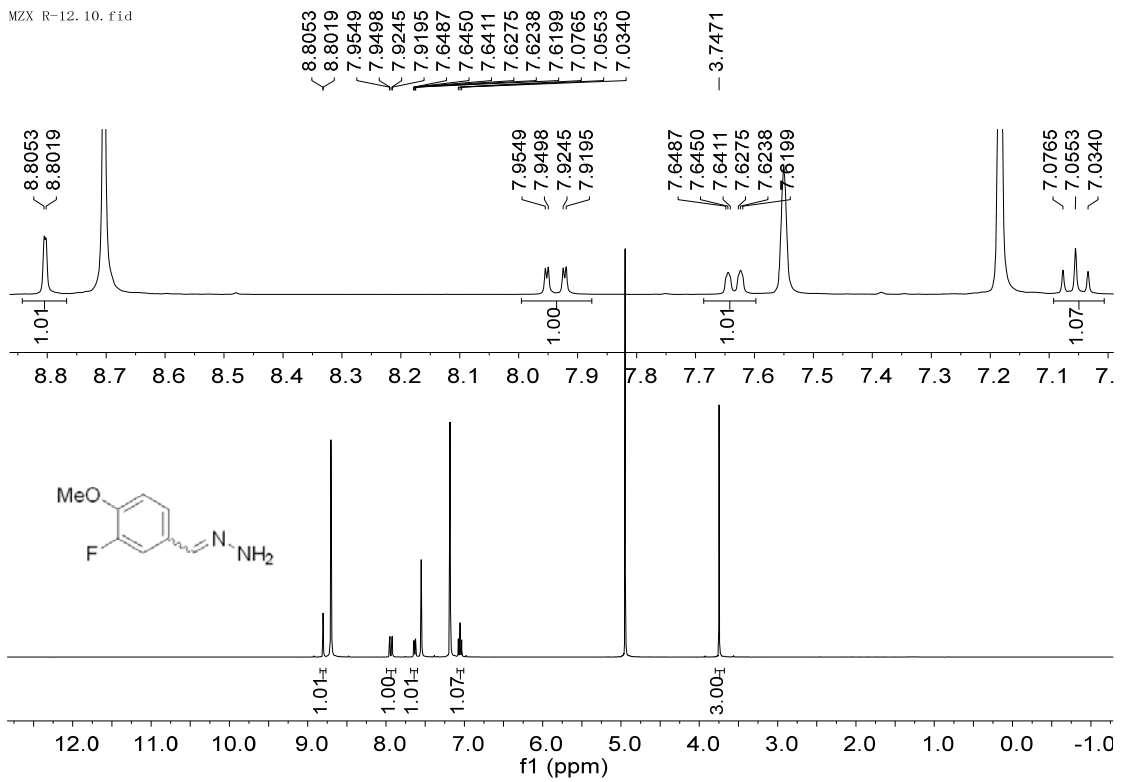

### <sup>13</sup>C NMR (in Pyridine-d<sub>5</sub>)

MZX R-12 C. 2. fid

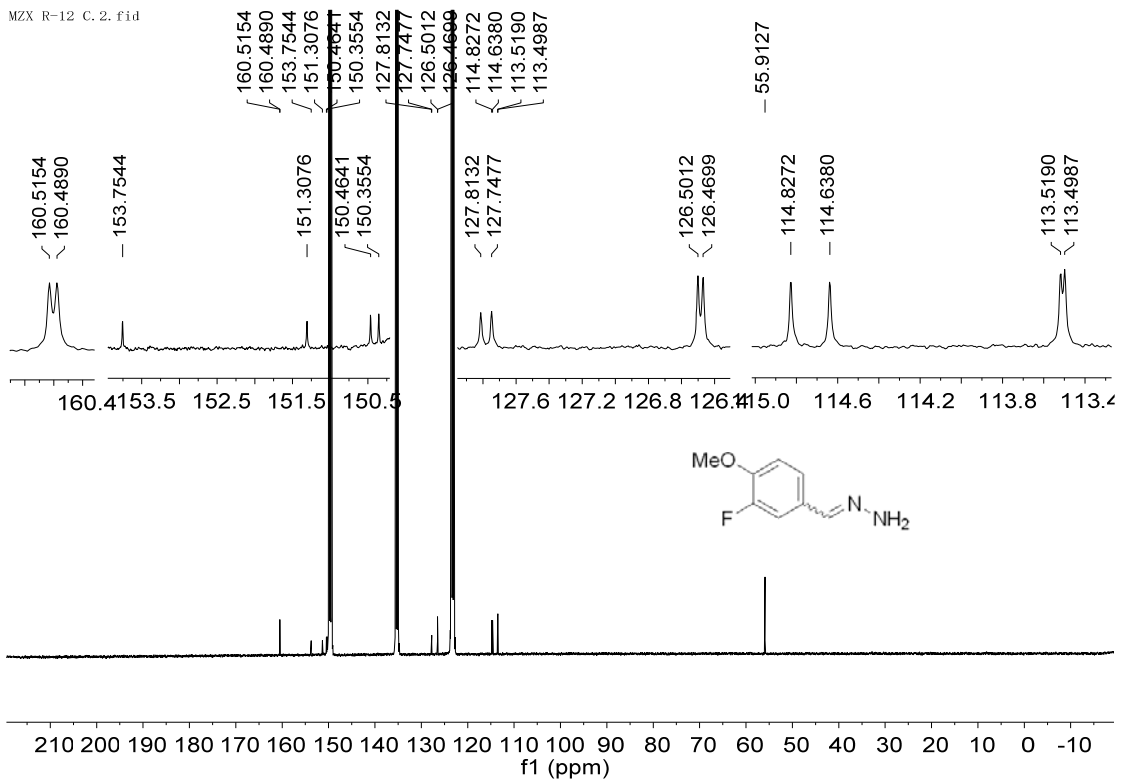

### DEPT 90 and DEPT 135 (in Pyridine-*d*<sub>5</sub>)

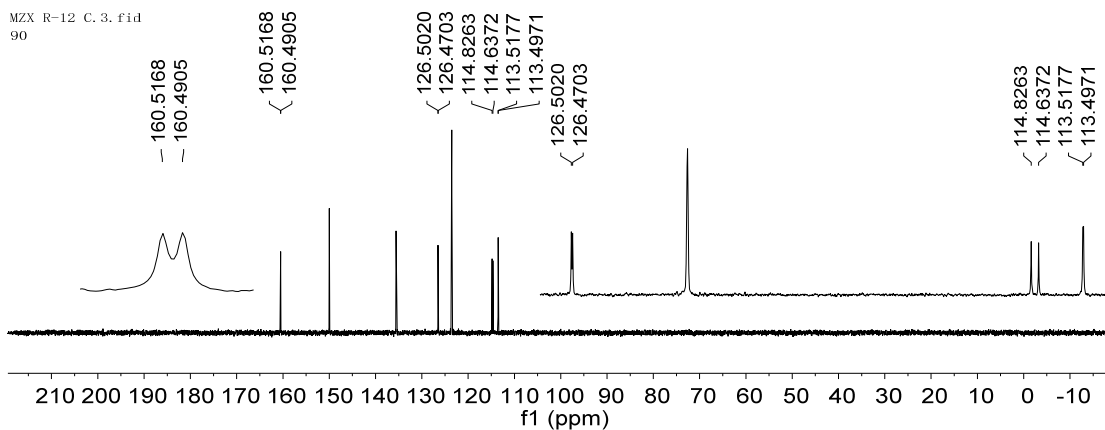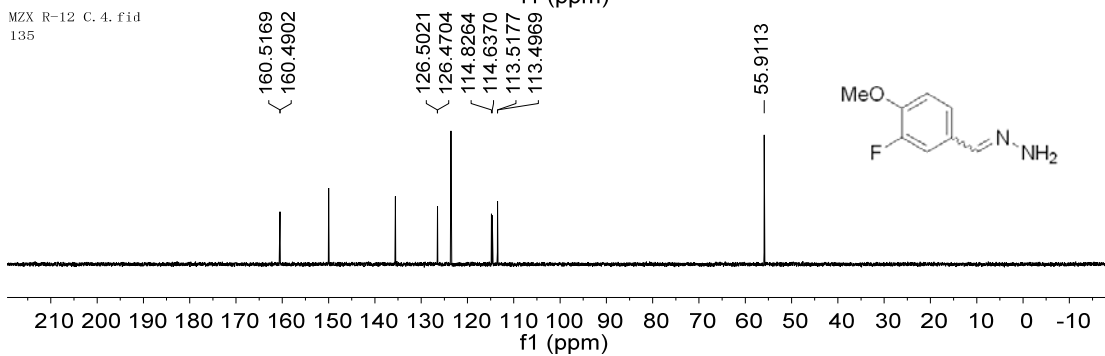

### <sup>19</sup>F NMR (in Pyridine-*d*<sub>5</sub>)

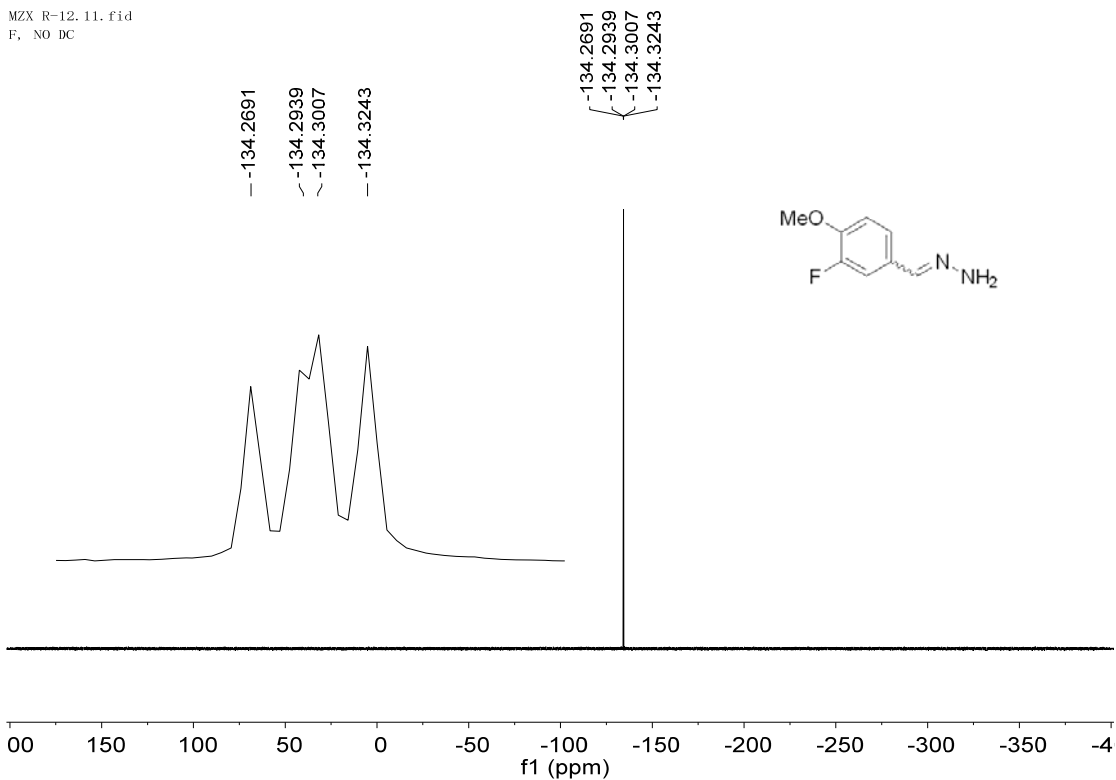

### 2v, <sup>1</sup>H NMR

MZX R-4.20. fid

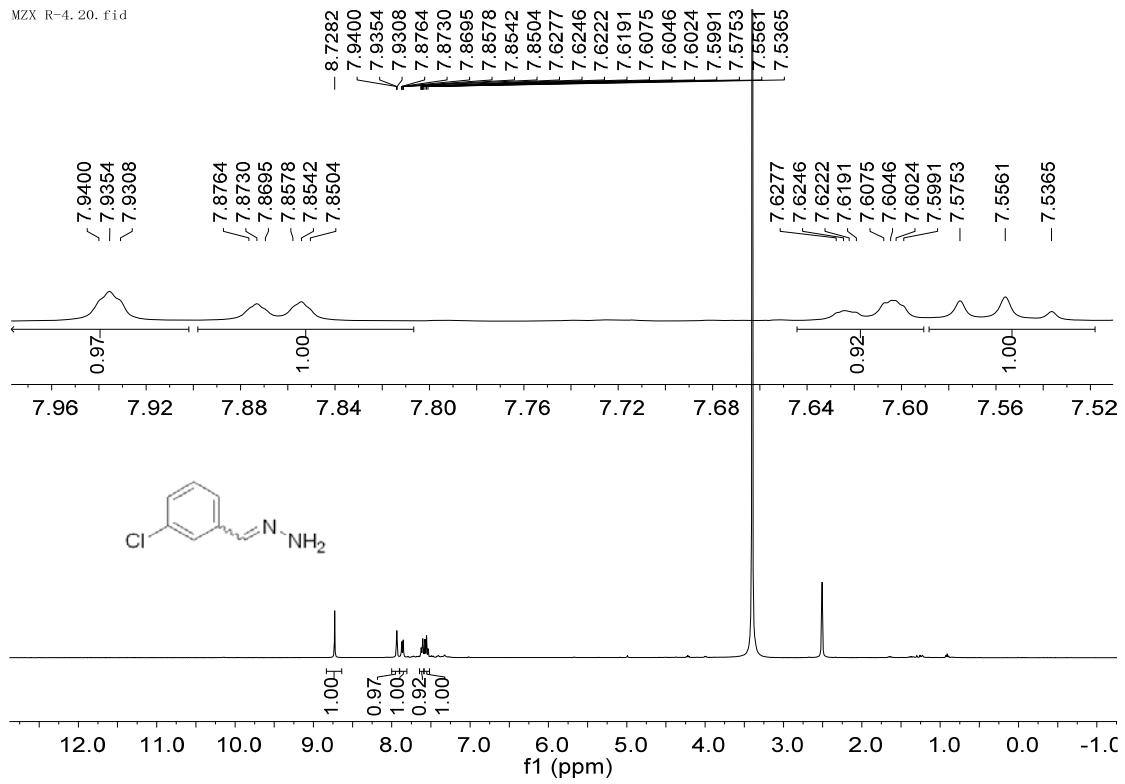

### <sup>13</sup>C NMR

MZX R-4.22. fid

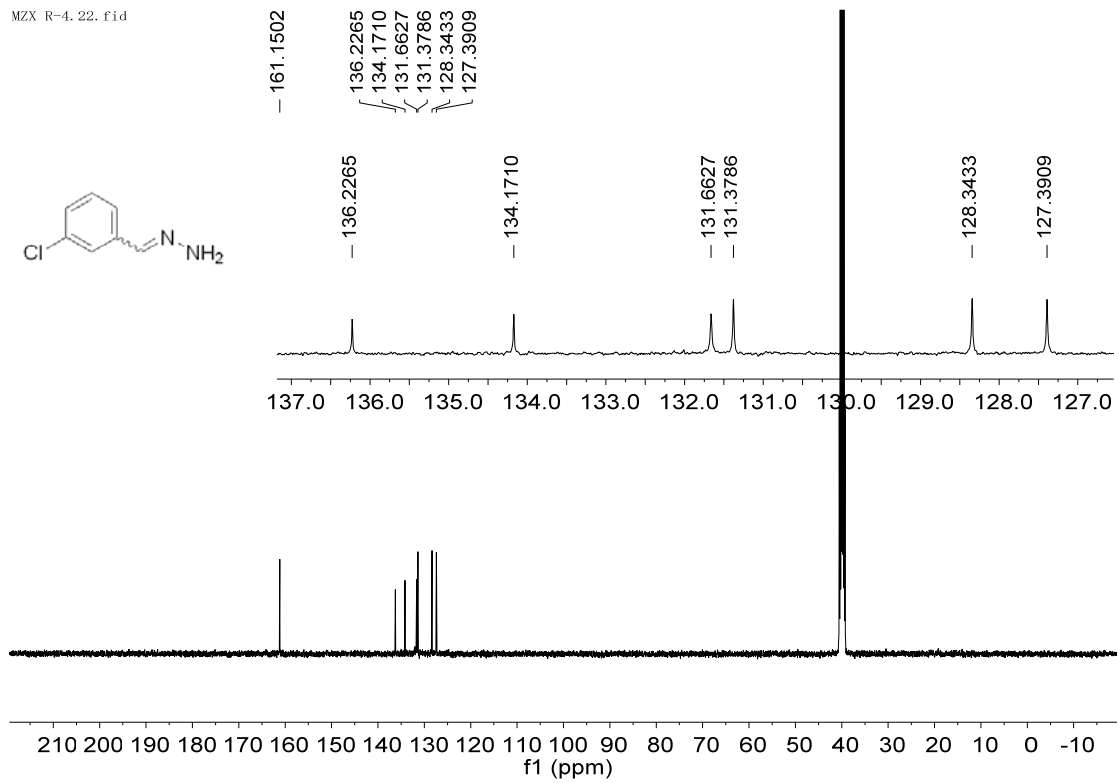

# DEPT 90 and DEPT 135

MZX R-4. 23. fid  
90

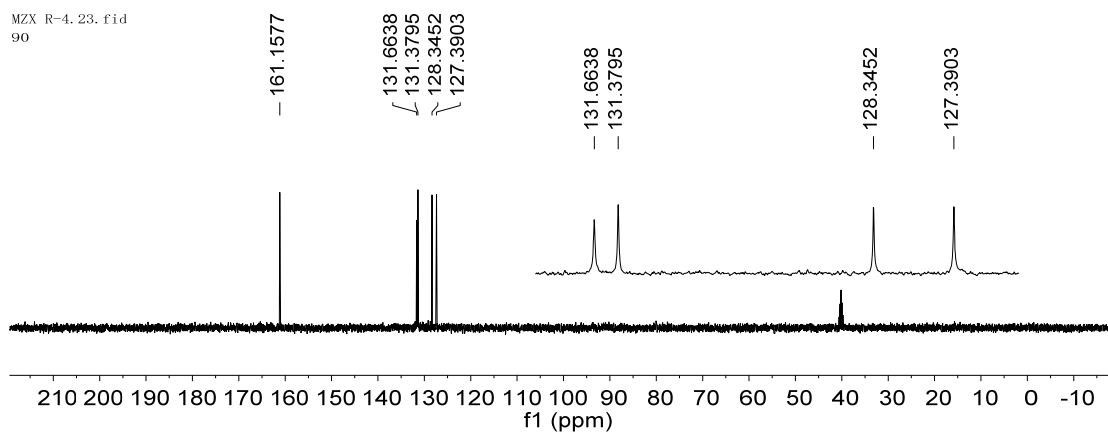

MZX R-4. 24. fid  
135

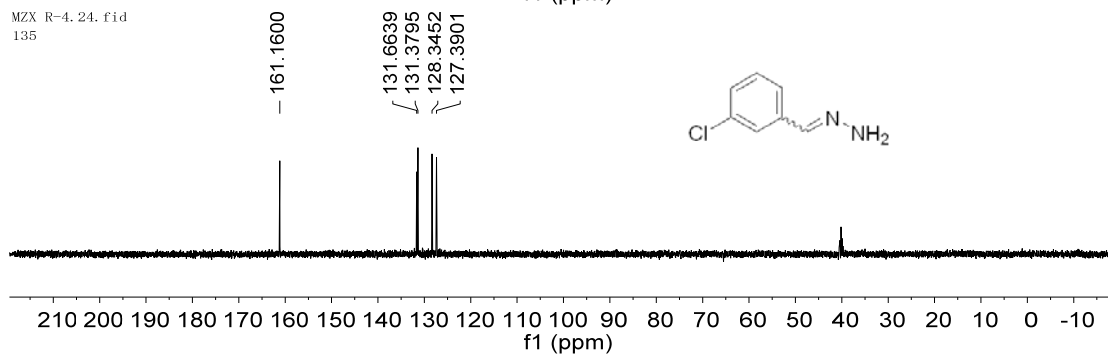

### 2ab, <sup>1</sup>H NMR

MZX R-5. 11. fid

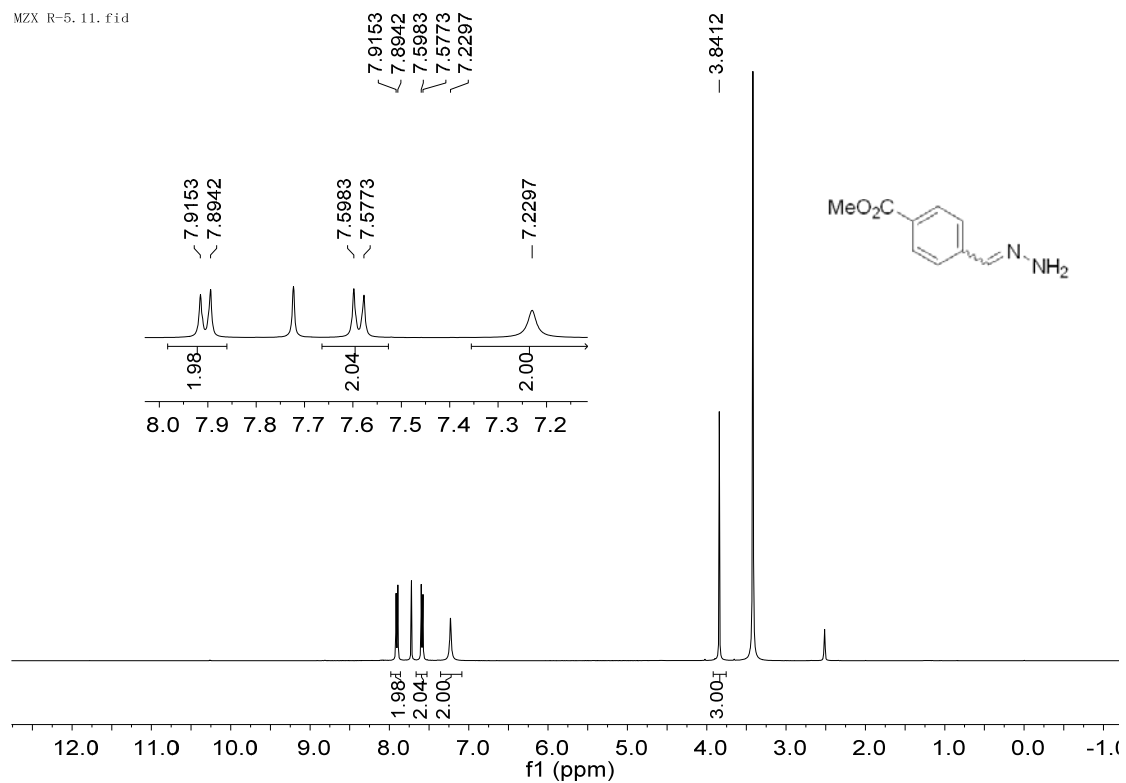

### <sup>13</sup>C NMR

MZX R-5. 12. fid

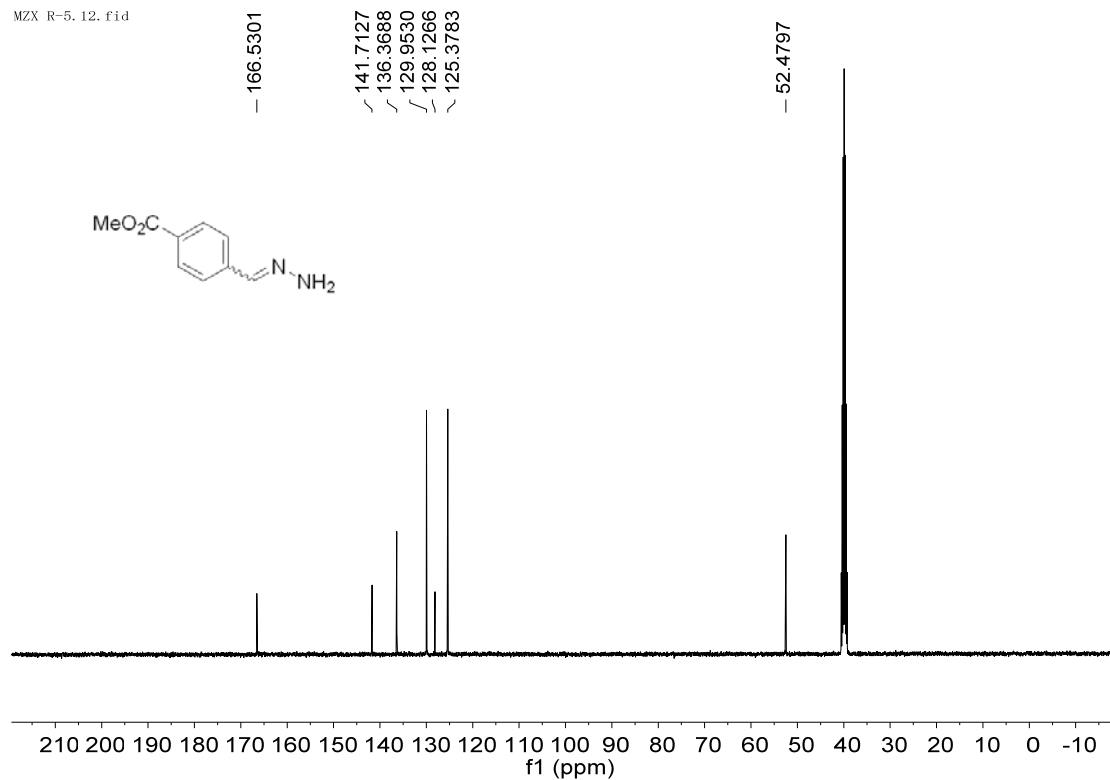

# DEPT 90 and DEPT 135

MZX R-5. 13. fid  
90

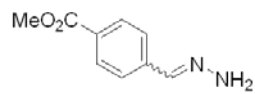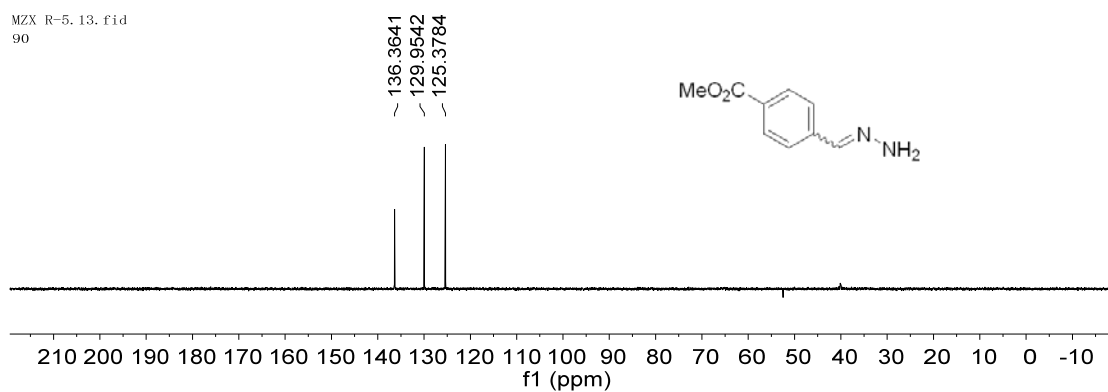

MZX R-5. 14. fid  
135

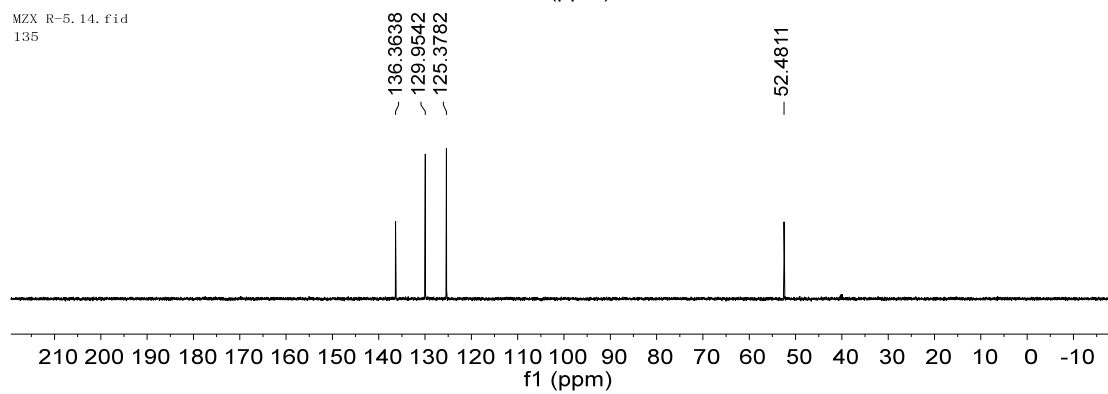

Supplement: d1qo00168j1.pdf [file d1qo00168j1.pdf]
